# Supplementary material for: Variability of DNA Methylation within Schizophrenia Risk Loci across Subregions of Human Hippocampus
Source: Genes (Basel). 2017 May 15;8(5):143. doi: 10.3390/genes8050143 (PMC5448017; doi:10.3390/genes8050143)
Supplement: Supplementary file 1 [file genes-08-00143-s001.xlsx]

## Sheet: AnnotatedDMPsPooled-CA1vsCA
TargetID	CHR	MAPINFO	Delta Beta	FDR	UCSC_REFGENE_NAME	UCSC_REFGENE_ACCESSION	UCSC_REFGENE_GROUP	RELATION_TO_UCSC_CPG_ISLAND
cg06736229	1	2373387	0.0646446	0.000254953				N_Shore
cg05031204	1	2375690	-0.0224315	0.0035733				Island
cg16904348	1	2377415	0.0737106	4.6e-07				S_Shore
cg15496335	1	2377971	0.037948	0.000563961				S_Shelf
cg10542127	1	2378521	0.0261085	0.00942901				S_Shelf			betafc is CA1 - CA3
cg00030604	1	2379831	-0.0194495	0.0146477
cg15548859	1	2381299	0.0914964	6.95e-08
cg14032998	1	2381623	0.0545226	0.00015376
cg12140755	1	2382583	0.0267498	0.00535314
cg12610239	1	2382748	0.0287108	0.000633292
cg06753057	1	2382774	0.0293693	0.0485683
cg12728061	1	2383438	0.0278459	0.00309186
cg06215416	1	2383473	0.0259811	0.00661332
cg13384949	1	2383501	0.0270827	0.00135277
cg00157179	1	2383687	0.0321618	0.000259736				N_Shelf
cg10556142	1	2385305	0.0264594	0.00484147				N_Shelf
cg11214544	1	2391121	0.0165321	0.0472861				S_Shelf
cg13556452	1	2391241	0.0716388	3.64e-05				S_Shelf
cg07700843	1	2391317	0.0510966	7.32e-06				S_Shelf
cg02850689	1	2391347	0.0390472	9.37e-05				S_Shelf
cg07381283	1	2391837	-0.0431341	6.36e-06				S_Shelf
cg11332951	1	2396472	-0.0188872	0.0256185				N_Shelf
cg16578609	1	2399051	-0.0182067	0.044688				Island
cg12929805	1	2399054	-0.0151162	0.0183509				Island
cg02624668	1	2401668	-0.00830711	0.0135756				S_Shelf
cg23049737	1	8412697	-0.0198641	0.00490953	RERE	NM_012102;NM_001042681;NM_001042682	3'UTR;3'UTR;3'UTR
cg12067736	1	8412849	-0.0290904	0.00526844	RERE	NM_012102;NM_001042681;NM_001042682	3'UTR;3'UTR;3'UTR
cg00569091	1	8424793	0.0358202	0.00595847	RERE	NM_001042682;NM_012102;NM_001042681	5'UTR;Body;Body
cg01771201	1	8427556	-0.024335	0.000672595	RERE	NM_001042682;NM_012102;NM_001042681	5'UTR;Body;Body
cg13081009	1	8430745	0.0442168	0.000134589	RERE	NM_001042682;NM_012102;NM_001042681	5'UTR;Body;Body
cg06634717	1	8442507	0.0164061	0.0451964	RERE	NM_001042682;NM_012102;NM_001042681	5'UTR;Body;Body
cg09246103	1	8456466	0.0352732	0.0218841	RERE	NM_001042682;NM_012102;NM_001042681	5'UTR;Body;Body
cg05045335	1	8457417	0.0394294	7.9e-05	RERE	NM_001042682;NM_012102;NM_001042681	5'UTR;Body;Body
cg20316440	1	8457758	-0.0347903	1.55e-06	RERE	NM_001042682;NM_012102;NM_001042681	5'UTR;Body;Body
cg19679865	1	8467904	-0.0299122	0.00203856	RERE	NM_001042682;NM_012102;NM_001042681	5'UTR;Body;Body
cg15702277	1	8477935	-0.0243771	0.00273518	RERE	NM_001042682;NM_012102;NM_001042681	5'UTR;Body;Body
cg13400249	1	8480963	-0.0488602	9.02e-05	RERE	NM_001042682;NM_012102;NM_001042681	5'UTR;Body;Body	N_Shelf
cg22736444	1	8483475	-0.0174148	0.0275993	RERE	NM_001042682;NM_012102;NM_001042681	5'UTR;Body;Body	Island
cg13841373	1	8484084	-0.013296	0.0104849	RERE	NM_012102;NM_001042682;NM_001042681	Body;TSS1500;Body	Island
cg09539943	1	8484097	-0.0365448	0.00154987	RERE	NM_012102;NM_001042682;NM_001042681	Body;TSS1500;Body	Island
cg23843414	1	8484310	-0.0398209	0.00281215	RERE	NM_012102;NM_001042682;NM_001042681	Body;TSS1500;Body	Island
cg25001161	1	8484338	-0.0371862	1.42e-05	RERE	NM_012102;NM_001042682;NM_001042681	Body;TSS1500;Body	Island
cg00120948	1	8484417	-0.0797409	4.45e-08	RERE	NM_012102;NM_001042682;NM_001042681	Body;TSS1500;Body	S_Shore
cg24536965	1	8492032	-0.0231628	0.000183419	RERE	NM_012102;NM_001042681	Body;Body
cg08653904	1	8497643	0.0933976	2.33e-08	RERE	NM_012102;NM_001042681	Body;Body
cg17029193	1	8510607	-0.0406665	3.66e-07	RERE	NM_012102;NM_001042681	Body;Body
cg23209606	1	8515930	-0.0163209	0.0181289	RERE	NM_012102;NM_001042681	Body;Body
cg15148088	1	8518145	0.0833133	1.4e-07	RERE	NM_012102;NM_001042681	Body;Body
cg15701149	1	8536454	0.0422229	0.00283843	RERE	NM_012102;NM_001042681	Body;Body
cg11080552	1	8556722	0.0567358	1.64e-06	RERE	NM_012102;NM_001042681	Body;Body
cg14286456	1	8570225	0.0339749	0.0263691	RERE	NM_012102;NM_001042681	Body;Body
cg20416874	1	8611966	0.0290023	0.00372239	RERE	NM_012102;NM_001042681	Body;Body
cg25722041	1	8623473	0.0380266	1.81e-05	RERE	NM_012102;NM_001042681	Body;Body
cg18645642	1	8631756	0.0648032	9.88e-05	RERE	NM_012102;NM_001042681	Body;Body
cg04025127	1	44030580	0.0546659	3.38e-06	PTPRF	NM_002840;NM_130440	Body;Body	N_Shore
cg15268136	1	44031309	0.0166969	0.0156912	PTPRF	NM_002840;NM_130440	Body;Body	Island
cg25219246	1	44053380	0.0493932	1.34e-07	PTPRF	NM_002840;NM_130440	Body;Body	N_Shelf
cg24808162	1	44067587	0.0807639	1.09e-09	PTPRF	NM_002840;NM_130440	Body;Body	N_Shelf
cg05661060	1	44074454	-0.00954039	0.00358303	PTPRF	NM_002840;NM_130440	Body;Body	S_Shelf
cg00946598	1	44117093	0.0371318	2.96e-05	KDM4A	NM_014663	5'UTR	S_Shore
cg15991546	1	98386723	0.0417045	0.00274507	DPYD	NM_001160301;NM_000110	TSS200;TSS200	Island
cg02658730	1	98510182	-0.0229841	0.00735426				N_Shore
cg14783814	1	98511792	0.0189467	0.0109751	MIR137	NR_029679	TSS200	S_Shore
cg10489614	1	98512194	-0.0374281	0.00949664	MIR137	NR_029679	TSS1500	S_Shore
cg19361032	1	98514282	0.0330119	0.021566				S_Shelf
cg24866936	1	98514430	0.0165953	0.0214752				S_Shelf
cg18021690	1	150039108	0.025922	0.0426105	VPS45	NM_007259	TSS1500	N_Shore
cg05135541	1	150039387	0.0248856	0.0453521	VPS45	NM_007259;NM_007259	5'UTR;1stExon	Island
cg01522975	1	150039920	0.00808551	0.0146375	VPS45	NM_007259	1stExon	S_Shore
cg26352401	1	150040160	0.0368581	0.00134516	VPS45	NM_007259	Body	S_Shore
cg05228338	1	150048339	-0.0470048	0.0256185	VPS45	NM_007259	Body
cg24437535	1	150121441	-0.0274959	0.00329852	PLEKHO1	NM_016274	TSS1500	N_Shore
cg23258881	1	150123037	-0.0891476	2.77e-06	PLEKHO1	NM_016274	Body	Island
cg20577019	1	150123077	-0.0466664	2.29e-06	PLEKHO1	NM_016274	Body	Island
cg11199810	1	150123146	-0.0715033	1.18e-05	PLEKHO1	NM_016274	Body	S_Shore
cg20785674	1	150123490	-0.0891472	8.08e-09	PLEKHO1	NM_016274	Body	S_Shore
cg23369564	1	150123734	-0.0411294	9.07e-06	PLEKHO1	NM_016274	Body	S_Shore
cg20849928	1	150182644	-0.0316241	0.00367058				N_Shelf
cg26574003	1	150186289	0.0278864	0.0201397				S_Shore
cg03541057	1	150206242	0.0302236	0.0207954	ANP32E	NM_001136478;NM_001136479;NM_030920	Body;5'UTR;Body	N_Shore
cg01371477	1	150207822	0.0245321	0.0461228	ANP32E	NM_001136479;NM_001136478;NM_030920	TSS1500;Body;Body	Island
cg10549188	1	150208539	0.0116987	0.0235524	ANP32E	NM_030920;NM_001136478	TSS200;TSS200	S_Shore
cg04405926	1	150208726	0.0427405	0.0420502	ANP32E	NM_001136478;NM_030920	TSS1500;TSS1500	S_Shore
cg27589731	1	150229143	0.0326453	0.000758772	CA14	NM_012113	TSS1500
cg20791007	1	150229443	0.0539776	3.22e-07	CA14	NM_012113	TSS1500
cg03969696	1	150229580	0.0312304	0.00800176	CA14	NM_012113	TSS1500
cg19320294	1	150229871	0.0732728	1.78e-05	CA14	NM_012113	TSS1500
cg00561287	1	150230177	0.0263894	0.00589673	CA14	NM_012113	TSS200
cg05037389	1	150230233	0.0296352	0.00321885	CA14	NM_012113;NM_012113	1stExon;5'UTR
cg00102955	1	150230345	0.0221468	0.000283957	CA14	NM_012113;NM_012113	1stExon;5'UTR
cg09872278	1	150231727	0.0929492	8.57e-07	CA14	NM_012113	Body
cg18766795	1	177251261	0.0528265	1e-06	FAM5B	NM_021165	3'UTR
cg22500738	1	207928706	-0.0139336	0.0275993	CD46	NM_172360;NM_172357;NM_172359;NM_172358;NM_172354;NM_172353;NM_172351;NM_172356;NM_172355;NM_002389;NM_172350;NM_172361;NM_153826;NM_172352	Body;Body;Body;Body;Body;Body;Body;Body;Body;Body;Body;Body;Body;Body	S_Shelf
cg25727477	1	207967739	0.0857251	1.9e-05	CD46	NM_172357;NM_172354;NM_172361;NM_002389;NM_153826;NM_172360;NM_172359;NM_172356;NM_172358;NM_172350;NM_172353;NM_172355;NM_172352;NM_172351	3'UTR;3'UTR;3'UTR;3'UTR;3'UTR;3'UTR;3'UTR;3'UTR;3'UTR;3'UTR;3'UTR;3'UTR;3'UTR;3'UTR
cg00823526	1	207976495	-0.0155457	0.00355348	MIR29B2	NR_029518;NR_029832	TSS1500;TSS1500
cg22525895	1	207977042	-0.0403773	0.00681708	MIR29B2	NR_029518	TSS1500
cg03888412	1	207990895	-0.0102691	0.0104848	LOC148696	NR_026817	TSS1500
cg05700897	1	207991166	-0.0235582	0.000333637	LOC148696	NR_026817	TSS1500
cg23918388	1	207991593	-0.02074	0.000327357	LOC148696	NR_026817	TSS200
cg04509266	1	207991597	-0.00663818	0.0144367	LOC148696	NR_026817	TSS200
cg11109027	1	207991720	-0.0108719	0.000913357	LOC148696	NR_026817	TSS200
cg10533159	1	207991937	-0.011708	0.0155037	LOC148696	NR_026817	Body
cg24507760	1	207992403	0.0460382	0.0193716	LOC148696	NR_026817	Body
cg22714290	1	207992548	0.0353648	0.00126302	LOC148696	NR_026817	Body
cg22793142	1	207995752	-0.0316112	8.64e-06	LOC148696	NR_026817	Body
cg10501210	1	207997020	-0.0268342	0.0466448
cg05956608	1	207999258	-0.0616558	5.6e-10
cg17877600	1	208005598	-0.0504078	5.39e-06
cg15646741	1	208021736	-0.0283236	1.54e-05
cg00962740	1	243507532	0.0429871	0.00394625	SDCCAG8	NM_006642	Body
cg05593162	1	243577377	0.037361	0.000436627	SDCCAG8	NM_006642	Body
cg23270529	1	243584668	0.127803	3.72e-09	SDCCAG8	NM_006642	Body
cg21526778	1	243584861	0.200404	5.35e-11	SDCCAG8	NM_006642	Body
cg16126286	1	243646235	-0.0366088	0.00281393	SDCCAG8	NM_006642	Body	N_Shore
cg01550716	1	243646318	-0.034541	0.000169129	SDCCAG8	NM_006642	Body	N_Shore
cg27259271	1	243646395	-0.0387352	0.000969835	SDCCAG8	NM_006642	Body	Island
cg22699026	1	243646402	-0.0445472	3.54e-05	SDCCAG8	NM_006642	Body	Island
cg12211856	1	243646691	-0.0542865	1.75e-05	SDCCAG8	NM_006642	Body	Island
cg06882058	1	243646787	-0.0414377	2.05e-05	SDCCAG8	NM_006642	Body	Island
cg02528319	1	243651750	0.056285	0.00460695	SDCCAG8;AKT3	NM_006642;NM_181690	Body;3'UTR	N_Shore
cg22950111	1	243651920	0.0827187	1.48e-05	SDCCAG8;AKT3	NM_006642;NM_181690	Body;3'UTR	N_Shore
cg16052388	1	243652456	0.0378472	0.000744513	SDCCAG8;AKT3	NM_006642;NM_181690	Body;3'UTR	Island
cg10801331	1	243658775	0.014261	0.00158274	SDCCAG8;AKT3	NM_006642;NM_181690	Body;3'UTR
cg04221461	1	243877024	0.0482532	0.000222202	AKT3	NM_005465;NM_181690	Body;Body
cg17133045	1	243877447	0.0759987	0.000147856	AKT3	NM_005465;NM_181690	Body;Body
cg15962538	1	243904118	-0.0130318	0.0101785	AKT3	NM_005465;NM_181690	Body;Body
cg22177451	2	57986550	0.0705678	1.45e-05
cg02738617	2	58023996	0.0365262	0.0239068
cg00610000	2	58272914	-0.0251338	0.0081276	VRK2	NM_001130483;NM_001130482;NM_001130481;NM_001136027;NM_006296;NM_001130480	TSS1500;TSS1500;TSS1500;TSS1500;TSS1500;TSS1500	N_Shore
cg18998670	2	58273552	0.0323024	0.0164202	VRK2	NM_001130483;NM_001130481;NM_001130480;NM_001136027;NM_001130482;NM_006296	TSS200;TSS200;TSS200;TSS1500;TSS200;TSS200	N_Shore
cg05505450	2	58273643	0.0249737	0.0113997	VRK2	NM_001130483;NM_001130481;NM_001130480;NM_001136027;NM_001130482;NM_006296	TSS200;TSS200;TSS200;TSS200;TSS200;TSS200	Island
cg26093711	2	58273654	0.0322904	0.000576609	VRK2	NM_001130483;NM_001130481;NM_001130480;NM_001136027;NM_001130482;NM_006296	TSS200;TSS200;TSS200;TSS200;TSS200;TSS200	Island
cg14399369	2	58273683	0.0406069	0.00954558	VRK2	NM_001130483;NM_001130481;NM_001130480;NM_001136027;NM_001130482;NM_006296	TSS200;TSS200;TSS200;TSS200;TSS200;TSS200	Island
cg12901182	2	58274421	0.0185858	0.0141254	VRK2	NM_006296;NM_001130480;NM_001130483;NM_001130482;NM_001130481;NM_001136027	5'UTR;5'UTR;5'UTR;5'UTR;5'UTR;5'UTR	Island
cg22346380	2	58274524	0.0160588	0.047078	VRK2	NM_006296;NM_001130480;NM_001130483;NM_001130482;NM_001130481;NM_001136027	5'UTR;5'UTR;5'UTR;5'UTR;5'UTR;5'UTR	S_Shore
cg07227049	2	58335008	0.118843	1.18e-08	VRK2	NM_001130483;NM_001136027;NM_006296;NM_001130482;NM_001130480;NM_001130481	Body;Body;Body;Body;Body;Body
cg15160709	2	72357937	-0.0747471	1.09e-09	CYP26B1	NM_019885	3'UTR
cg05414442	2	72358024	-0.0761918	6.48e-09	CYP26B1	NM_019885	3'UTR
cg19599251	2	72360229	-0.00342077	0.0248836	CYP26B1	NM_019885	Body
cg06122697	2	72363781	0.0748338	7.98e-08	CYP26B1	NM_019885	Body
cg00066942	2	149401448	-0.0403834	0.00327712	EPC2	NM_015630	TSS1500	N_Shore
cg22897235	2	149403244	0.0219526	0.0194505	EPC2	NM_015630	Body	Island
cg11656382	2	149406282	0.0466988	0.0158976	EPC2	NM_015630	Body	S_Shelf
cg26872780	2	149478494	0.0314523	0.0252355	EPC2	NM_015630	Body
cg00151251	2	198173194	0.0428427	9.43e-05				N_Shore
cg17016369	2	198246278	-0.0138543	0.0495376
cg18854872	2	198292151	0.0974641	9.48e-08	SF3B1	NM_001005526;NM_012433	Body;Body
cg02208776	2	198365119	0.00704074	0.0306596	HSPE1;HSPD1	NM_002157;NM_002157;NM_002156;NM_199440	1stExon;5'UTR;TSS1500;TSS200	Island
cg04657470	2	198365150	0.0181576	0.037467	HSPE1;HSPD1	NM_002157;NM_002157;NM_002156;NM_199440	1stExon;5'UTR;TSS1500;TSS200	Island
cg22827827	2	198367525	0.0189876	0.0301105	HSPE1	NM_002157	Body	S_Shelf
cg03928690	2	198381209	0.0292073	0.00465945	MOBKL3	NM_199482;NM_001100819;NM_015387	5'UTR;Body;Body	Island
cg01766396	2	198436483	0.086943	5.89e-05	RFTN2	NM_144629	3'UTR
cg09565806	2	198492976	0.0346779	9.04e-05	RFTN2	NM_144629	Body
cg04016383	2	198513476	-0.0128839	0.0187328	RFTN2	NM_144629	Body
cg23334662	2	198540518	0.0454232	0.000333637	RFTN2	NM_144629;NM_144629	1stExon;5'UTR
cg09096031	2	198540569	0.0478131	7.21e-05	RFTN2	NM_144629;NM_144629	1stExon;5'UTR
cg08373610	2	198540621	0.0380672	0.000238474	RFTN2	NM_144629	TSS200
cg22387019	2	198541772	0.0539956	0.00028726	RFTN2	NM_144629	TSS1500
cg18267436	2	198593201	0.096167	5.39e-06	BOLL	NM_033030;NM_197970	3'UTR;3'UTR
cg07495363	2	198651076	-0.0514541	0.0115865	BOLL	NM_197970;NM_033030	TSS200;TSS1500	Island
cg00524271	2	198668185	0.0469614	0.00263314	PLCL1	NM_006226	TSS1500	N_Shore
cg06734510	2	198673750	0.0179756	0.0282965	PLCL1	NM_006226	Body	S_Shelf
cg12600692	2	198809390	0.106408	1.57e-07	PLCL1	NM_006226	Body
cg04554576	2	200168577	0.0572405	5.48e-06	SATB2	NM_015265	Body
cg03735916	2	200715285	0.0170788	0.0498121				N_Shore
cg17379405	2	200716738	-0.037021	0.00748908				S_Shore
cg19824006	2	200718119	0.0626181	9.2e-05				S_Shelf
cg08172999	2	200775722	0.0635045	0.0220832	C2orf69	NM_153689	TSS1500	N_Shore
cg24301350	2	200776224	0.0233864	0.0292515	C2orf69	NM_153689	1stExon	Island
cg13143872	2	200778865	0.0251608	0.0173643	C2orf69	NM_153689	Body	S_Shelf
cg22737473	2	200823609	0.0136174	0.0118253	C2orf47	NM_024520	Body	S_Shelf
cg24422171	2	225365163	-0.02622	0.0390905	CUL3	NM_003590	Body
cg15720017	2	225378351	-0.0328473	0.0488211	CUL3	NM_003590	Body
cg01474011	2	225435131	0.0292184	0.00737339	CUL3	NM_003590	Body
cg25451702	2	225440982	-0.0135294	0.00818646	CUL3	NM_003590	Body
cg13982505	2	233642094	0.0612604	4.69e-06	GIGYF2	NM_015575;NM_001103147;NM_001103146;NM_002242;NM_001103148	Body;Body;Body;TSS1500;Body
cg08188368	2	233680285	0.0835797	4.73e-07	GIGYF2	NM_015575;NM_001103147;NM_001103146;NM_001103148	Body;Body;Body;Body
cg21993290	2	233703120	0.0398452	7.58e-05	GIGYF2	NM_015575;NM_001103147;NM_001103146;NM_001103148	Body;Body;Body;Body
cg26429017	2	233734820	-0.0256467	0.00183828	C2orf82	NM_206895	TSS200
cg21120063	2	233734910	0.0563059	5.2e-06	C2orf82	NM_206895	TSS200
cg13047596	2	233735017	-0.0103582	0.0283098	C2orf82	NM_206895;NM_206895	5'UTR;1stExon
cg04276057	2	233736931	0.045535	9.19e-07	C2orf82	NM_206895	Body	N_Shelf
cg17611093	2	233739114	-0.0299146	1.06e-05	C2orf82	NM_206895	Body	N_Shore
cg13759905	2	233741920	-0.0388165	2.49e-05				S_Shore
cg17048169	2	233744073	-0.0256848	7.84e-05	NGEF	NM_001114090;NM_019850	3'UTR;3'UTR	S_Shelf
cg15518294	2	233748276	-0.014149	0.0109751	NGEF	NM_019850;NM_001114090	Body;Body
cg16596103	2	233749413	-0.0405374	6.2e-06	NGEF	NM_019850;NM_001114090	Body;Body
cg05673534	2	233750541	0.0149039	0.0188947	NGEF	NM_019850;NM_001114090	Body;Body
cg12997538	3	2553085	0.0539755	5.12e-05	CNTN4	NM_175607	5'UTR
cg25512439	3	2553112	0.0384345	1.16e-05	CNTN4	NM_175607	5'UTR
cg08499832	3	2553187	0.0423704	1.16e-05	CNTN4	NM_175607	5'UTR
cg22375856	3	17301676	-0.0273159	0.0375272	TBC1D5	NM_014744;NM_001134380;NM_001134381	Body;Body;Body
cg12990219	3	17686199	-0.0328985	0.00069664	TBC1D5	NM_014744;NM_001134380;NM_001134381	5'UTR;5'UTR;5'UTR
cg07654588	3	17782211	0.0360556	0.000237788	TBC1D5	NM_014744;NM_014744;NM_001134380	1stExon;5'UTR;5'UTR	N_Shore
cg21833841	3	36868879	-0.0194984	0.0321446	TRANK1	NM_014831	3'UTR
cg18099408	3	52552593	0.0121303	0.00449671	STAB1	NM_015136	Body	N_Shore
cg15147215	3	52552868	0.0169502	0.0298756	STAB1	NM_015136	Body	Island
cg08222913	3	52553049	0.0300078	0.00425347	STAB1	NM_015136	Body	Island
cg02980023	3	52558373	-0.024858	0.00472048	STAB1	NM_015136	3'UTR	N_Shore
cg07757611	3	52559064	-0.03764	2.48e-06	NT5DC2	NM_001134231;NM_022908	Body;Body	S_Shore
cg00108715	3	52565015	-0.0199625	0.017802	NT5DC2	NM_001134231;NM_022908	Body;Body	N_Shore
cg07507251	3	52567010	-0.039897	0.00014981	NT5DC2	NM_001134231;NM_022908	Body;Body	Island
cg02231066	3	52567130	-0.0569636	0.00284093	NT5DC2	NM_001134231;NM_022908	Body;Body	Island
cg25934064	3	52569026	0.0356439	1.16e-05	NT5DC2	NM_022908;NM_022908;NM_001134231	5'UTR;1stExon;TSS1500	N_Shore
cg18337363	3	52569053	0.0388462	6.98e-08	NT5DC2	NM_022908;NM_022908;NM_001134231	5'UTR;1stExon;TSS1500	N_Shore
cg22710716	3	52569097	0.044356	9.02e-05	NT5DC2	NM_022908;NM_001134231	TSS200;TSS1500	N_Shore
cg13284614	3	52569169	0.0206105	3.11e-05	NT5DC2;LOC440957	NM_022908;NM_001134231;NM_001124767	TSS200;TSS1500;TSS1500	N_Shore
cg16905306	3	52574451	0.0327416	1.75e-05	LOC440957	NM_001124767	Body	S_Shelf
cg05923681	3	52580707	0.122293	1.03e-09	PBRM1	NM_181042;NM_018313;NM_018165	3'UTR;3'UTR;3'UTR
cg19508367	3	52591502	0.0614592	0.00180143	PBRM1	NM_181042;NM_018313;NM_018165	Body;Body;Body
cg15690379	3	52683739	0.0355707	0.000633292	PBRM1	NM_181042;NM_018313;NM_018165	Body;Body;Body
cg11041457	3	52719354	0.0240447	0.0298729	GNL3;PBRM1	NM_206826;NM_018313;NM_014366;NM_206825	TSS1500;5'UTR;TSS1500;TSS1500	N_Shore
cg00150837	3	52721831	0.0156187	0.0237282	GNL3;SNORD19	NM_206826;NM_014366;NM_206825;NR_003047	Body;Body;Body;TSS1500	S_Shore
cg27294008	3	52748359	0.0360872	0.00383608	NEK4	NM_003157	Body
cg03143060	3	52805638	-0.0259728	0.0104848	NEK4	NM_003157	TSS1500	S_Shore
cg07054668	3	52811637	0.0200853	0.00504366	ITIH1	NM_002215;NM_001166434	1stExon;TSS1500
cg05283597	3	52812410	-0.0161714	0.00940125	ITIH1	NM_001166434;NM_002215	TSS200;Body
cg11163571	3	52813833	-0.0168434	0.00422421	ITIH1	NM_001166435;NM_001166436;NM_001166434;NM_002215	TSS200;TSS200;Body;Body
cg05991220	3	52813859	-0.0129158	0.0170271	ITIH1	NM_001166435;NM_001166436;NM_001166434;NM_002215	TSS200;TSS200;Body;Body
cg10584271	3	52814643	0.0256591	0.00449199	ITIH1	NM_001166435;NM_001166434;NM_001166436;NM_002215	5'UTR;Body;5'UTR;Body
cg18404041	3	52824283	0.0267716	0.0152146	ITIH1	NM_001166435;NM_001166434;NM_001166436;NM_002215	Body;Body;Body;Body
cg16423337	3	52828818	0.0244645	0.00346403	ITIH3	NM_002217;NM_002217	5'UTR;1stExon
cg07464094	3	52832769	-0.0202793	0.00729693	ITIH3	NM_002217	Body
cg27125504	3	52865637	0.0905965	1.96e-05	ITIH4	NM_001166449;NM_002218	TSS1500;TSS1500
cg06204229	3	52865917	-0.0126968	0.00691145	ITIH4	NM_001166449;NM_002218	TSS1500;TSS1500
cg22704203	3	52867330	-0.0161371	8.62e-05	MUSTN1	NM_205853	3'UTR
cg24629711	3	52869263	0.031569	0.00267214	MUSTN1	NM_205853	TSS200
cg20735041	3	52869266	0.0343253	0.00131809	MUSTN1	NM_205853	TSS200
cg21547371	3	52869521	0.0190202	0.010643	MUSTN1	NM_205853	TSS1500
cg13641778	3	52879742	0.0660461	1.19e-07	TMEM110	NM_198563	Body
cg02133011	3	63803766	0.0701519	1.81e-07	C3orf49	NR_026866	TSS1500
cg21565017	3	63804683	0.0197141	0.00329852	C3orf49	NR_026866	TSS1500
cg18542842	3	63857914	-0.0514283	0.0417389	ATXN7	NM_000333;NM_001128149	5'UTR;5'UTR
cg08875947	3	63880859	-0.0110797	0.00472939	ATXN7	NM_000333;NM_001128149	5'UTR;5'UTR
cg05999010	3	63881712	0.027823	0.00104632	ATXN7	NM_000333;NM_001128149	5'UTR;5'UTR
cg13320202	3	63899097	-0.0479044	2.35e-06	ATXN7	NM_000333;NM_001128149	Body;Body	S_Shore
cg20829834	3	63946048	-0.049562	0.000163653	ATXN7	NM_000333;NM_001128149	Body;Body
cg08992499	3	63956514	0.0814084	2.47e-05	ATXN7	NM_000333;NM_001128149	Body;Body
cg07275179	3	63962440	-0.00901722	0.0386533	ATXN7	NM_000333;NM_001128149	Body;Body
cg18405880	3	63978545	-0.0172158	0.00533199	ATXN7	NM_000333;NM_001128149	Body;Body
cg08031689	3	135870058	0.0352456	0.000668566	MSL2	NM_001145417;NM_018133	Body;Body
cg22376827	3	135913335	0.0265178	0.0187541	MSL2	NM_001145417;NM_018133	TSS200;Body	N_Shore
cg25498969	3	136062740	0.0626044	0.00018248	STAG1	NM_005862	Body
cg20519665	3	136497758	0.0593093	2.04e-06
cg22156842	3	136537169	-0.0211023	0.00097441	TMEM22	NM_025246;NM_001097599;NM_001097600	TSS1500;TSS1500;TSS1500	N_Shore
cg10727673	3	136537267	-0.0327847	0.000183274	TMEM22	NM_025246;NM_001097599;NM_001097600	TSS1500;TSS1500;TSS1500	N_Shore
cg18740893	3	136538934	0.0429578	0.00117514	TMEM22	NM_001097600;NM_025246;NM_001097599	5'UTR;5'UTR;5'UTR	Island
cg00475787	3	180641553	0.10404	3.07e-08	FXR1	NM_001013438;NM_001013439;NM_005087	Body;5'UTR;Body
cg05997021	3	180707907	0.0260421	0.0124112	DNAJC19	NM_145261	TSS1500	S_Shore
cg25436634	3	181045270	0.0432992	0.00571866
cg15475553	3	181101204	0.0353705	1.81e-05
cg13448092	3	181135878	0.036556	0.00608654
cg03267502	4	170534530	0.0153292	0.0495376	NEK1	NM_012224	TSS1500	S_Shore
cg18399218	4	170561359	0.0240529	0.033167	CLCN3	NM_173872;NM_001829	Body;Body
cg26072437	4	170581380	0.0263984	0.0329429	CLCN3	NM_173872;NM_001829	Body;Body
cg09030852	4	170629768	0.067559	2.04e-05	CLCN3	NM_173872;NM_001829	Body;Body
cg23337845	4	170641374	0.091593	1.39e-06	CLCN3	NM_173872;NM_001829	3'UTR;3'UTR
cg20565082	5	60525509	-0.0272355	0.00436371
ch.5.1161320F	5	60527978	0.0451912	0.0220832
cg19768229	5	60615309	-0.0418752	0.00924804
cg26124526	5	60618932	-0.021887	0.00166917
cg27132966	5	60625532	-0.0144529	0.00664968				N_Shore
cg14742809	5	60631028	0.0176843	0.00549961	ZSWIM6	NM_020928	Body	S_Shore
cg25386954	5	60640139	0.0935903	9.19e-07	ZSWIM6	NM_020928	Body
cg19456451	5	60699375	0.0424039	0.00221276	ZSWIM6	NM_020928	Body
cg18259253	5	60745986	-0.015202	9.02e-05	ZSWIM6	NM_020928	Body
cg18443559	5	109078338	0.0214627	0.0152146	MAN2A1	NM_002372	Body
cg04520047	5	137606606	0.0118814	0.0155629	GFRA3	NM_001496	Body	N_Shelf
cg04840828	5	137611496	-0.0255723	0.0113898	GFRA3	NM_001496	TSS1500	S_Shore
cg19870978	5	137673245	0.0182689	0.0144367	FAM53C;FAM53C;FAM53C	NM_001135647;NM_001135647;NM_016605	1stExon;5'UTR;TSS1500	N_Shore
cg01632097	5	137897226	-0.0103856	0.0297622	HSPA9;SNORD63	NM_004134;NR_002913	Body;TSS1500
cg18372930	5	137939469	-0.0400934	2.83e-05
cg10920316	5	137946599	0.0330967	0.000149506
cg12420107	5	140090300	-0.0295916	0.0186993	VTRNA1-1	NR_026703	TSS1500
cg16179182	5	140090404	-0.0229752	0.0479328	VTRNA1-1	NR_026703	TSS1500
cg12150457	5	140165687	0.0390629	0.00906945	PCDHA1;PCDHA1;PCDHA1	NM_031411;NM_018900;NM_031410	TSS200;TSS200;TSS200	N_Shore
cg03318614	5	140174612	0.0253909	0.0381461	PCDHA1;PCDHA1;PCDHA2;PCDHA2	NM_031411;NM_018900;NM_031495;NM_018905	Body;Body;1stExon;1stExon	Island
cg03694936	5	140179490	-0.0308068	0.0414668	PCDHA2;PCDHA1;PCDHA3;PCDHA1;PCDHA3	NM_018905;NM_031411;NM_018906;NM_018900;NM_031497	Body;Body;TSS1500;Body;TSS1500	N_Shore
cg11781306	5	140201656	-0.0390034	0.00716358	PCDHA2;PCDHA1;PCDHA1;PCDHA3;PCDHA4;PCDHA5;PCDHA5	NM_018905;NM_031411;NM_018900;NM_018906;NM_018907;NM_031501;NM_018908	Body;Body;Body;Body;Body;1stExon;1stExon	Island
cg19106945	5	140206841	0.0392656	0.0457342	PCDHA2;PCDHA1;PCDHA1;PCDHA5;PCDHA6;PCDHA3;PCDHA6;PCDHA4;PCDHA6	NM_018905;NM_031411;NM_018900;NM_018908;NM_018909;NM_018906;NM_031848;NM_018907;NM_031849	Body;Body;Body;Body;TSS1500;Body;TSS1500;Body;TSS1500	N_Shore
cg26618441	5	140213825	0.036584	0.0378494	PCDHA6;PCDHA2;PCDHA1;PCDHA7;PCDHA1;PCDHA6;PCDHA5;PCDHA7;PCDHA3;PCDHA4	NM_031849;NM_018905;NM_031411;NM_031852;NM_018900;NM_018909;NM_018908;NM_018910;NM_018906;NM_018907	Body;Body;Body;TSS200;Body;Body;Body;TSS200;Body;Body	N_Shore
cg06938264	5	140214372	0.033971	0.0321446	PCDHA6;PCDHA2;PCDHA1;PCDHA7;PCDHA1;PCDHA6;PCDHA5;PCDHA3;PCDHA4;PCDHA7	NM_031849;NM_018905;NM_031411;NM_031852;NM_018900;NM_018909;NM_018908;NM_018906;NM_018907;NM_018910	Body;Body;Body;1stExon;Body;Body;Body;Body;Body;1stExon	Island
cg04634417	5	140220803	0.0518074	3.01e-05	PCDHA6;PCDHA2;PCDHA1;PCDHA8;PCDHA7;PCDHA1;PCDHA6;PCDHA5;PCDHA8;PCDHA3;PCDHA4	NM_031849;NM_018905;NM_031411;NM_018911;NM_018910;NM_018900;NM_018909;NM_018908;NM_031856;NM_018906;NM_018907	Body;Body;Body;TSS200;Body;Body;Body;Body;TSS200;Body;Body	N_Shore
cg02560085	5	140220810	0.0382472	0.00352194	PCDHA6;PCDHA2;PCDHA1;PCDHA8;PCDHA7;PCDHA1;PCDHA6;PCDHA5;PCDHA8;PCDHA3;PCDHA4	NM_031849;NM_018905;NM_031411;NM_018911;NM_018910;NM_018900;NM_018909;NM_018908;NM_031856;NM_018906;NM_018907	Body;Body;Body;TSS200;Body;Body;Body;Body;TSS200;Body;Body	N_Shore
cg17261096	5	151986804	0.0298451	0.0370538
cg10931792	5	152022470	-0.015255	0.0305286
cg25545074	5	152097174	-0.0148552	0.020531
cg10976311	5	152591026	0.0449442	0.0101405
cg07369507	6	28304287	0.0334348	0.0223261	ZNF323;ZNF323;ZNF323;ZNF323;ZNF323;ZNF323	NR_024164;NR_024165;NM_001135215;NM_030899;NM_145909;NM_001135216	TSS1500;TSS200;5'UTR;TSS200;5'UTR;TSS1500
cg21177257	6	28322092	0.0304854	0.00973099	ZNF323;ZKSCAN3;ZNF323	NM_001135215;NM_024493;NM_145909	5'UTR;5'UTR;TSS200
cg21771726	6	28348476	0.102272	1.81e-06	ZSCAN12	NR_028077	Body	N_Shelf
cg25728685	6	28351148	-0.0374043	0.0129186	ZSCAN12	NR_028077	Body	Island
cg15964468	6	28351351	-0.0314812	0.00475318	ZSCAN12	NR_028077	Body	Island
cg12297501	6	28364357	0.00998848	0.004261	ZSCAN12;ZSCAN12	NM_001163391;NR_028077	Body;Body	N_Shelf
cg04799120	6	28371032	0.0502528	0.000527725				S_Shelf
cg12831863	6	28457210	0.0294882	0.029985				N_Shore
cg20971927	6	28471077	0.0149622	0.010898	GPX6	NM_182701	3'UTR
cg07790947	6	28474513	0.0318888	0.0487783	GPX6	NM_182701	Body
cg05921260	6	28484915	0.0125791	0.0420695	GPX6	NM_182701	TSS1500
cg23824666	6	28493661	-0.0193768	0.00294885	GPX5;GPX5	NM_003996;NM_001509	TSS200;TSS200
cg19168192	6	28493664	-0.0165142	0.00951658	GPX5;GPX5	NM_003996;NM_001509	TSS200;TSS200
cg12939270	6	28494445	0.026873	0.00821093	GPX5;GPX5	NM_003996;NM_001509	Body;Body
cg25320749	6	28494732	0.0252116	0.00343716	GPX5;GPX5	NM_003996;NM_001509	Body;Body
cg21644009	6	28494863	0.0231427	0.0186993	GPX5;GPX5	NM_003996;NM_001509	Body;Body
cg18361418	6	28499676	0.0502299	3.29e-06	GPX5;GPX5	NM_003996;NM_001509	Body;Body
cg23936402	6	28499703	0.064419	2.77e-06	GPX5;GPX5	NM_003996;NM_001509	Body;Body
cg04405612	6	28499825	0.0215572	0.00444364	GPX5;GPX5	NM_003996;NM_001509	Body;Body
cg12280901	6	28501816	0.0193232	0.0475842	GPX5;GPX5	NM_001509;NM_003996	Body;3'UTR
cg21534401	6	28501916	0.0173845	0.000736595	GPX5;GPX5	NM_001509;NM_003996	Body;3'UTR
cg15031983	6	28510376	0.0203891	0.0486429
cg17120654	6	28551020	-0.0126089	0.0261296	SCAND3	NM_052923	Body	N_Shelf
cg19747271	6	28553390	0.0232895	0.00752712	SCAND3	NM_052923	Body	N_Shore
cg22302929	6	28554373	0.0480182	0.000157574	SCAND3	NM_052923	1stExon	N_Shore
cg26145670	6	28554497	0.0458668	5.92e-05	SCAND3;SCAND3	NM_052923;NM_052923	1stExon;5'UTR	N_Shore
cg11414709	6	28555055	-0.0136086	0.0252355	SCAND3;SCAND3	NM_052923;NM_052923	1stExon;5'UTR	Island
cg22867156	6	28555664	0.0291526	0.00460695	SCAND3	NM_052923	TSS1500	S_Shore
cg25679766	6	28558113	-0.0294783	0.022893				S_Shelf
cg20851828	6	28601440	0.010869	0.024485				N_Shore
cg21144120	6	28661199	0.0584349	3.37e-07
cg23250574	6	28661310	0.0692826	3.22e-07
cg01530154	6	28661712	0.0283565	0.000333637
cg14234426	6	28677112	0.041593	0.0169643
cg05279229	7	1896384	-0.0135071	0.015825	MAD1L1;MAD1L1;MAD1L1	NM_003550;NM_001013837;NM_001013836	Body;Body;Body	Island
cg12538522	7	1897374	-0.0135212	0.0381286	MAD1L1;MAD1L1;MAD1L1	NM_003550;NM_001013837;NM_001013836	Body;Body;Body	S_Shore
cg17187143	7	1903058	-0.0231027	3.88e-05	MAD1L1;MAD1L1;MAD1L1	NM_003550;NM_001013837;NM_001013836	Body;Body;Body	Island
cg04622224	7	1903159	-0.0204015	0.0034093	MAD1L1;MAD1L1;MAD1L1	NM_003550;NM_001013837;NM_001013836	Body;Body;Body	S_Shore
cg27212520	7	1912334	-0.0180359	0.0218841	MAD1L1;MAD1L1;MAD1L1	NM_003550;NM_001013837;NM_001013836	Body;Body;Body	N_Shore
cg18650626	7	1914073	0.00763804	0.0410461	MAD1L1;MAD1L1;MAD1L1	NM_003550;NM_001013837;NM_001013836	Body;Body;Body	Island
cg24505167	7	1915268	-0.0359838	0.000312886	MAD1L1;MAD1L1;MAD1L1	NM_003550;NM_001013837;NM_001013836	Body;Body;Body	S_Shore
cg12376829	7	1915363	-0.0163539	0.00591369	MAD1L1;MAD1L1;MAD1L1	NM_003550;NM_001013837;NM_001013836	Body;Body;Body	S_Shore
cg02272667	7	1922866	-0.0342669	5.38e-05	MAD1L1;MAD1L1;MAD1L1	NM_003550;NM_001013837;NM_001013836	Body;Body;Body
cg01886004	7	1923613	-0.0144261	0.0110875	MAD1L1;MAD1L1;MAD1L1	NM_003550;NM_001013837;NM_001013836	Body;Body;Body
cg02421172	7	1938701	-0.0403385	2.85e-05	MAD1L1;MAD1L1;MAD1L1	NM_003550;NM_001013837;NM_001013836	Body;Body;Body	S_Shore
cg00749118	7	1938791	-0.0286426	6.48e-06	MAD1L1;MAD1L1;MAD1L1	NM_003550;NM_001013837;NM_001013836	Body;Body;Body	S_Shore
cg16393715	7	1948819	-0.0392576	1.24e-05	MAD1L1;MAD1L1;MAD1L1	NM_003550;NM_001013837;NM_001013836	Body;Body;Body	N_Shore
cg17329602	7	1948947	-0.0273902	9e-05	MAD1L1;MAD1L1;MAD1L1	NM_003550;NM_001013837;NM_001013836	Body;Body;Body	N_Shore
cg07610468	7	1949632	0.0555914	1.08e-07	MAD1L1;MAD1L1;MAD1L1	NM_003550;NM_001013837;NM_001013836	Body;Body;Body	N_Shore
cg17542346	7	1952807	-0.0171123	0.0237282	MAD1L1;MAD1L1;MAD1L1	NM_003550;NM_001013837;NM_001013836	Body;Body;Body	S_Shelf
cg01301117	7	1953969	-0.0145013	0.00224159	MAD1L1;MAD1L1;MAD1L1	NM_003550;NM_001013837;NM_001013836	Body;Body;Body	S_Shelf
cg23667108	7	1954008	-0.0207743	7.33e-05	MAD1L1;MAD1L1;MAD1L1	NM_003550;NM_001013837;NM_001013836	Body;Body;Body	S_Shelf
cg26811313	7	1959989	-0.04977	1.38e-05	MAD1L1;MAD1L1;MAD1L1	NM_003550;NM_001013837;NM_001013836	Body;Body;Body
cg17309904	7	1960073	-0.04785	5.01e-05	MAD1L1;MAD1L1;MAD1L1	NM_003550;NM_001013837;NM_001013836	Body;Body;Body
cg08712631	7	1960676	-0.0681198	3.06e-06	MAD1L1;MAD1L1;MAD1L1	NM_003550;NM_001013837;NM_001013836	Body;Body;Body
cg17551891	7	1960795	-0.0643927	6.61e-08	MAD1L1;MAD1L1;MAD1L1	NM_003550;NM_001013837;NM_001013836	Body;Body;Body
cg15997393	7	1961869	-0.0129593	0.0182867	MAD1L1;MAD1L1;MAD1L1	NM_003550;NM_001013837;NM_001013836	Body;Body;Body
cg26204448	7	1962212	-0.00538815	0.0341658	MAD1L1;MAD1L1;MAD1L1	NM_003550;NM_001013837;NM_001013836	Body;Body;Body
cg25193073	7	1967621	0.0217553	0.000371536	MAD1L1;MAD1L1;MAD1L1	NM_003550;NM_001013837;NM_001013836	Body;Body;Body	N_Shore
cg05323058	7	1969193	-0.0097811	0.020531	MAD1L1;MAD1L1;MAD1L1	NM_003550;NM_001013837;NM_001013836	Body;Body;Body	N_Shore
cg10532980	7	1971467	-0.019856	0.020531	MAD1L1;MAD1L1;MAD1L1	NM_003550;NM_001013837;NM_001013836	Body;Body;Body	S_Shore
cg12253851	7	1973091	-0.0209631	0.00780267	MAD1L1;MAD1L1;MAD1L1	NM_003550;NM_001013837;NM_001013836	Body;Body;Body	N_Shelf
cg05894015	7	1974838	-0.0103646	0.035614	MAD1L1;MAD1L1;MAD1L1	NM_003550;NM_001013837;NM_001013836	Body;Body;Body	N_Shore
cg21728101	7	1979360	-0.0303823	0.000203047	MAD1L1;MAD1L1;MAD1L1	NM_003550;NM_001013837;NM_001013836	Body;Body;Body	S_Shore
cg20777796	7	1980117	-0.0209616	0.00200611	MAD1L1;MAD1L1;MAD1L1	NM_003550;NM_001013837;NM_001013836	Body;Body;Body	S_Shore
cg03604067	7	1980273	-0.0195342	0.024475	MAD1L1;MAD1L1;MAD1L1	NM_003550;NM_001013837;NM_001013836	Body;Body;Body	S_Shore
cg13798585	7	1980479	-0.0166405	0.0081276	MAD1L1;MAD1L1;MAD1L1	NM_003550;NM_001013837;NM_001013836	Body;Body;Body	S_Shore
cg12017631	7	1980892	-0.0235417	0.00199682	MAD1L1;MAD1L1;MAD1L1	NM_003550;NM_001013837;NM_001013836	Body;Body;Body	S_Shore
cg21936454	7	1983169	0.0176035	0.00272778	MAD1L1;MAD1L1;MAD1L1	NM_003550;NM_001013837;NM_001013836	Body;Body;Body
cg11797898	7	1983375	0.0837585	2.4e-07	MAD1L1;MAD1L1;MAD1L1	NM_003550;NM_001013837;NM_001013836	Body;Body;Body
cg21180201	7	1983503	0.0421673	1.24e-06	MAD1L1;MAD1L1;MAD1L1	NM_003550;NM_001013837;NM_001013836	Body;Body;Body
cg11001739	7	1983918	-0.0152683	0.00462779	MAD1L1;MAD1L1;MAD1L1	NM_003550;NM_001013837;NM_001013836	Body;Body;Body
cg23997168	7	1984831	-0.0443922	1.64e-06	MAD1L1;MAD1L1;MAD1L1	NM_003550;NM_001013837;NM_001013836	Body;Body;Body
cg07147130	7	1984938	-0.0404347	1.82e-07	MAD1L1;MAD1L1;MAD1L1	NM_003550;NM_001013837;NM_001013836	Body;Body;Body
cg24858207	7	1989993	-0.00920259	0.03718	MAD1L1;MAD1L1;MAD1L1	NM_003550;NM_001013837;NM_001013836	Body;Body;Body	N_Shore
cg08214518	7	1990114	0.0144351	0.0252738	MAD1L1;MAD1L1;MAD1L1	NM_003550;NM_001013837;NM_001013836	Body;Body;Body	N_Shore
cg00197322	7	1990554	-0.0147321	0.0381286	MAD1L1;MAD1L1;MAD1L1	NM_003550;NM_001013837;NM_001013836	Body;Body;Body	N_Shore
cg16086269	7	1991495	-0.0134344	0.00951658	MAD1L1;MAD1L1;MAD1L1	NM_003550;NM_001013837;NM_001013836	Body;Body;Body	N_Shore
cg14972721	7	2003279	-0.0167706	0.00505285	MAD1L1;MAD1L1;MAD1L1	NM_003550;NM_001013837;NM_001013836	Body;Body;Body
cg27217945	7	2025386	-0.0102513	0.00716358	MAD1L1;MAD1L1;MAD1L1	NM_003550;NM_001013837;NM_001013836	Body;Body;Body	N_Shore
cg04170282	7	2025606	0.0359758	0.000221795	MAD1L1;MAD1L1;MAD1L1	NM_003550;NM_001013837;NM_001013836	Body;Body;Body	N_Shore
cg23729427	7	2025799	0.0146276	0.00214557	MAD1L1;MAD1L1;MAD1L1	NM_003550;NM_001013837;NM_001013836	Body;Body;Body	N_Shore
cg05342467	7	2029732	-0.0111441	0.000607992	MAD1L1;MAD1L1;MAD1L1	NM_003550;NM_001013837;NM_001013836	Body;Body;Body	S_Shore
cg05434287	7	2030229	-0.0226079	0.000104257	MAD1L1;MAD1L1;MAD1L1	NM_003550;NM_001013837;NM_001013836	Body;Body;Body	S_Shore
cg21782813	7	2030301	-0.0272769	0.00294885	MAD1L1;MAD1L1;MAD1L1	NM_003550;NM_001013837;NM_001013836	Body;Body;Body	S_Shore
cg16960402	7	2032075	0.0337514	0.000266499	MAD1L1;MAD1L1;MAD1L1	NM_003550;NM_001013837;NM_001013836	Body;Body;Body	S_Shelf
cg08722586	7	2046821	0.0247468	0.00100334	MAD1L1;MAD1L1;MAD1L1	NM_003550;NM_001013837;NM_001013836	Body;Body;Body	S_Shelf
cg21155852	7	2048760	-0.011408	0.00267922	MAD1L1;MAD1L1;MAD1L1	NM_003550;NM_001013837;NM_001013836	Body;Body;Body	S_Shelf
cg10534659	7	2049947	-0.00669474	0.0446413	MAD1L1;MAD1L1;MAD1L1	NM_003550;NM_001013837;NM_001013836	Body;Body;Body
cg26462130	7	2052961	0.0942969	3.66e-09	MAD1L1;MAD1L1;MAD1L1	NM_003550;NM_001013837;NM_001013836	Body;Body;Body	N_Shore
cg20530835	7	2056550	0.0941178	1.91e-06	MAD1L1;MAD1L1;MAD1L1	NM_003550;NM_001013837;NM_001013836	Body;Body;Body	N_Shelf
cg15225688	7	2057835	0.0381377	0.00012413	MAD1L1;MAD1L1;MAD1L1	NM_003550;NM_001013837;NM_001013836	Body;Body;Body	N_Shelf
cg10784668	7	2058031	0.00705346	0.00811196	MAD1L1;MAD1L1;MAD1L1	NM_003550;NM_001013837;NM_001013836	Body;Body;Body	N_Shore
cg01128574	7	2058865	-0.0235391	0.00014981	MAD1L1;MAD1L1;MAD1L1	NM_003550;NM_001013837;NM_001013836	Body;Body;Body	N_Shore
cg07568296	7	2059150	-0.017352	0.049864	MAD1L1;MAD1L1;MAD1L1	NM_003550;NM_001013837;NM_001013836	Body;Body;Body	N_Shore
cg02305113	7	2059212	-0.0252884	0.00549961	MAD1L1;MAD1L1;MAD1L1	NM_003550;NM_001013837;NM_001013836	Body;Body;Body	N_Shore
cg21110456	7	2059412	-0.0257366	0.00273496	MAD1L1;MAD1L1;MAD1L1	NM_003550;NM_001013837;NM_001013836	Body;Body;Body	N_Shore
cg15896696	7	2059921	-0.0248274	0.00128584	MAD1L1;MAD1L1;MAD1L1	NM_003550;NM_001013837;NM_001013836	Body;Body;Body	Island
cg11870042	7	2060040	-0.0210196	0.00476925	MAD1L1;MAD1L1;MAD1L1	NM_003550;NM_001013837;NM_001013836	Body;Body;Body	Island
cg19629631	7	2060116	-0.0128386	0.00716094	MAD1L1;MAD1L1;MAD1L1	NM_003550;NM_001013837;NM_001013836	Body;Body;Body	Island
cg27211408	7	2060130	-0.0149762	0.00633872	MAD1L1;MAD1L1;MAD1L1	NM_003550;NM_001013837;NM_001013836	Body;Body;Body	Island
cg03723481	7	2071723	0.043718	1.66e-05	MAD1L1;MAD1L1;MAD1L1	NM_003550;NM_001013837;NM_001013836	Body;Body;Body
cg13571479	7	2077345	0.0333714	0.0461243	MAD1L1;MAD1L1;MAD1L1	NM_003550;NM_001013837;NM_001013836	Body;Body;Body
cg01843768	7	2078650	0.0393192	7.72e-05	MAD1L1;MAD1L1;MAD1L1	NM_003550;NM_001013837;NM_001013836	Body;Body;Body
cg04848693	7	2078786	0.0253888	0.00113717	MAD1L1;MAD1L1;MAD1L1	NM_003550;NM_001013837;NM_001013836	Body;Body;Body
cg25352924	7	2083583	-0.0285399	1.2e-05	MAD1L1;MAD1L1;MAD1L1	NM_003550;NM_001013837;NM_001013836	Body;Body;Body
cg14108894	7	2094628	0.0285672	8.68e-06	MAD1L1;MAD1L1;MAD1L1	NM_003550;NM_001013837;NM_001013836	Body;Body;Body
cg06555468	7	2094790	0.0396472	2.96e-05	MAD1L1;MAD1L1;MAD1L1	NM_003550;NM_001013837;NM_001013836	Body;Body;Body
cg18013792	7	2103069	-0.0143966	0.0124831	MAD1L1;MAD1L1;MAD1L1	NM_003550;NM_001013837;NM_001013836	Body;Body;Body	S_Shelf
cg27299047	7	2103248	-0.0318369	5.19e-05	MAD1L1;MAD1L1;MAD1L1	NM_003550;NM_001013837;NM_001013836	Body;Body;Body	N_Shelf
cg12098228	7	2106321	-0.0213726	0.00168246	MAD1L1;MAD1L1;MAD1L1	NM_003550;NM_001013837;NM_001013836	Body;Body;Body	N_Shore
cg20593887	7	2106784	-0.00823274	0.0458027	MAD1L1;MAD1L1;MAD1L1	NM_003550;NM_001013837;NM_001013836	Body;Body;Body	N_Shore
cg08210507	7	2109244	0.0438834	2.37e-05	MAD1L1;MAD1L1;MAD1L1	NM_003550;NM_001013837;NM_001013836	Body;Body;Body	S_Shore
cg02743256	7	2109353	0.035158	0.000686424	MAD1L1;MAD1L1;MAD1L1	NM_003550;NM_001013837;NM_001013836	Body;Body;Body	S_Shore
cg20556803	7	2114593	0.0333112	0.00135622	MAD1L1;MAD1L1;MAD1L1	NM_003550;NM_001013837;NM_001013836	Body;Body;Body	N_Shore
cg07065756	7	2119340	-0.0194403	0.000281039	MAD1L1;MAD1L1;MAD1L1	NM_003550;NM_001013837;NM_001013836	Body;Body;Body	S_Shelf
cg01028925	7	2122103	0.0330686	2.04e-05	MAD1L1;MAD1L1;MAD1L1	NM_003550;NM_001013837;NM_001013836	Body;Body;Body
cg23954880	7	2122342	-0.0203656	0.0108148	MAD1L1;MAD1L1;MAD1L1	NM_003550;NM_001013837;NM_001013836	Body;Body;Body
cg19382157	7	2124566	0.00671684	0.0259625	MAD1L1;MAD1L1;MAD1L1	NM_003550;NM_001013837;NM_001013836	Body;Body;Body
cg24525952	7	2127830	-0.0240298	0.000286811	MAD1L1;MAD1L1;MAD1L1	NM_003550;NM_001013837;NM_001013836	Body;Body;Body
cg15571623	7	2127984	-0.00812113	0.00752712	MAD1L1;MAD1L1;MAD1L1	NM_003550;NM_001013837;NM_001013836	Body;Body;Body
cg08024992	7	2133441	0.0175902	0.000734851	MAD1L1;MAD1L1;MAD1L1	NM_003550;NM_001013837;NM_001013836	Body;Body;Body
cg10950524	7	2139216	0.0171331	0.0411462	MAD1L1;MAD1L1;MAD1L1	NM_003550;NM_001013837;NM_001013836	Body;Body;Body
cg18265118	7	2139243	0.0345215	0.000436738	MAD1L1;MAD1L1;MAD1L1	NM_003550;NM_001013837;NM_001013836	Body;Body;Body
cg12964697	7	2140231	-0.0222512	0.00419953	MAD1L1;MAD1L1;MAD1L1	NM_003550;NM_001013837;NM_001013836	Body;Body;Body
cg15686782	7	2143886	-0.0354734	0.000111711	MAD1L1;MAD1L1;MAD1L1	NM_003550;NM_001013837;NM_001013836	Body;Body;Body
cg17618327	7	2143942	-0.108004	2.39e-09	MAD1L1;MAD1L1;MAD1L1	NM_003550;NM_001013837;NM_001013836	Body;Body;Body
cg10445988	7	2144559	-0.0237184	0.000300142	MAD1L1;MAD1L1;MAD1L1	NM_003550;NM_001013837;NM_001013836	Body;Body;Body
cg07143303	7	2144767	-0.0363618	6.86e-05	MAD1L1;MAD1L1;MAD1L1	NM_003550;NM_001013837;NM_001013836	Body;Body;Body
cg16329842	7	2148642	0.0621383	3.71e-05	MAD1L1;MAD1L1;MAD1L1	NM_003550;NM_001013837;NM_001013836	Body;Body;Body
cg20689661	7	2148808	0.0761269	1.73e-05	MAD1L1;MAD1L1;MAD1L1	NM_003550;NM_001013837;NM_001013836	Body;Body;Body
cg05212460	7	2149814	0.0379592	4.78e-05	MAD1L1;MAD1L1;MAD1L1	NM_003550;NM_001013837;NM_001013836	Body;Body;Body
cg09776772	7	2150534	-0.0242735	0.00507212	MAD1L1;MAD1L1;MAD1L1	NM_003550;NM_001013837;NM_001013836	Body;Body;Body
cg09174162	7	2150845	-0.0373553	0.000158621	MAD1L1;MAD1L1;MAD1L1	NM_003550;NM_001013837;NM_001013836	Body;Body;Body	N_Shelf
cg16012294	7	2151681	0.0443306	3.07e-06	MAD1L1;MAD1L1;MAD1L1	NM_003550;NM_001013837;NM_001013836	Body;Body;Body	N_Shelf
cg24655669	7	2151788	0.0591157	1.38e-07	MAD1L1;MAD1L1;MAD1L1	NM_003550;NM_001013837;NM_001013836	Body;Body;Body	N_Shelf
cg15309361	7	2152625	-0.0230468	0.000775409	MAD1L1;MAD1L1;MAD1L1	NM_003550;NM_001013837;NM_001013836	Body;Body;Body	N_Shelf
cg26584120	7	2152705	-0.0342836	0.000158621	MAD1L1;MAD1L1;MAD1L1	NM_003550;NM_001013837;NM_001013836	Body;Body;Body	N_Shore
cg24234270	7	2152821	-0.0224169	0.000412502	MAD1L1;MAD1L1;MAD1L1	NM_003550;NM_001013837;NM_001013836	Body;Body;Body	N_Shore
cg10074347	7	2182153	-0.0396341	2.64e-08	MAD1L1;MAD1L1;MAD1L1	NM_003550;NM_001013837;NM_001013836	Body;Body;Body	N_Shelf
cg19266014	7	2183958	0.0400267	8.78e-06	MAD1L1;MAD1L1;MAD1L1	NM_003550;NM_001013837;NM_001013836	Body;Body;Body	N_Shore
cg02568153	7	2184201	0.0407831	1.25e-05	MAD1L1;MAD1L1;MAD1L1	NM_003550;NM_001013837;NM_001013836	Body;Body;Body	N_Shore
cg24254658	7	2184839	-0.0156456	0.0432508	MAD1L1;MAD1L1;MAD1L1	NM_003550;NM_001013837;NM_001013836	Body;Body;Body	N_Shore
cg05367893	7	2186465	-0.0143068	0.0139102	MAD1L1;MAD1L1;MAD1L1	NM_003550;NM_001013837;NM_001013836	Body;Body;Body	S_Shore
cg17790129	7	24738572	0.0274955	0.000231124	DFNA5;DFNA5;DFNA5	NM_001127454;NM_004403;NM_001127453	3'UTR;3'UTR;3'UTR
cg25577212	7	24740509	-0.0345848	0.000157574	DFNA5;DFNA5;DFNA5	NM_001127454;NM_004403;NM_001127453	Body;Body;Body
cg25709790	7	24742552	-0.0355258	8.45e-05	DFNA5;DFNA5;DFNA5	NM_001127454;NM_004403;NM_001127453	Body;Body;Body
cg04317854	7	24762562	-0.0412931	0.000149506	DFNA5;DFNA5;DFNA5	NM_001127454;NM_004403;NM_001127453	5'UTR;Body;Body
cg27436603	7	24772300	-0.0579764	6e-09	DFNA5;DFNA5;DFNA5	NM_001127454;NM_004403;NM_001127453	5'UTR;Body;Body
cg07293520	7	24797192	-0.0205846	0.0455066	DFNA5;DFNA5;DFNA5	NM_001127454;NM_004403;NM_001127453	5'UTR;5'UTR;TSS200	Island
cg01733570	7	24797656	-0.0435443	5.47e-05	DFNA5;DFNA5;DFNA5	NM_001127453;NM_001127454;NM_004403	TSS1500;TSS200;TSS200	S_Shore
cg25723149	7	24797680	-0.0436703	0.000310226	DFNA5;DFNA5;DFNA5	NM_001127453;NM_001127454;NM_004403	TSS1500;TSS200;TSS200	S_Shore
cg22804000	7	24797691	-0.0474226	5.38e-05	DFNA5;DFNA5;DFNA5	NM_001127453;NM_001127454;NM_004403	TSS1500;TSS200;TSS200	S_Shore
cg07504598	7	24797786	-0.0379848	0.000171883	DFNA5;DFNA5;DFNA5	NM_001127453;NM_001127454;NM_004403	TSS1500;TSS200;TSS200	S_Shore
cg15037663	7	24797835	-0.0418595	0.000237299	DFNA5;DFNA5;DFNA5	NM_001127453;NM_001127454;NM_004403	TSS1500;TSS200;TSS200	S_Shore
cg19706795	7	24797839	-0.0366587	2.1e-05	DFNA5;DFNA5;DFNA5	NM_001127453;NM_004403;NM_001127454	TSS1500;TSS1500;TSS1500	S_Shore
cg20764575	7	24797884	-0.0416395	0.000301678	DFNA5;DFNA5;DFNA5	NM_001127453;NM_004403;NM_001127454	TSS1500;TSS1500;TSS1500	S_Shore
cg12378001	7	24818413	-0.0115458	0.0237282
cg04062190	7	86413438	0.111214	1.05e-07	GRM3	NM_000840	Body	N_Shelf
cg01331810	7	86414302	0.0321612	0.00294885	GRM3	NM_000840	Body	N_Shore
cg18114313	7	104614435	-0.0236021	4.57e-06
cg03997145	7	104619961	0.0482215	0.000312886
cg05816398	7	104623427	0.10766	1.09e-09				N_Shore
cg15707163	7	104630661	0.0225269	0.0115072
cg07029980	7	104640734	0.0613614	0.000568501
cg00993799	7	104653126	-0.0215952	0.0146375	LOC100216545	NR_024586	Body	Island
cg20770516	7	104681396	0.0461704	0.00446195	MLL5;MLL5	NM_182931;NM_018682	5'UTR;5'UTR
cg25076197	7	104681440	0.0548968	0.000514165	MLL5;MLL5	NM_182931;NM_018682	Body;Body
cg10443040	7	104752310	0.0162298	0.0304954	MLL5;MLL5	NM_182931;NM_018682	Body;Body
cg10166277	7	104752828	-0.0245189	0.00180119	MLL5;MLL5	NM_182931;NM_018682	Body;Body
cg21021145	7	104758224	0.0539028	0.000478415	SRPK2;SRPK2	NM_182692;NM_182691	3'UTR;3'UTR
cg08746290	7	104829801	0.0556057	7.09e-08	SRPK2;SRPK2	NM_182691;NM_182692	Body;Body
cg20513448	7	104837830	0.0156726	0.00936257	SRPK2;SRPK2	NM_182691;NM_182692	Body;Body
cg15951914	7	104863626	0.0481355	4.18e-07	SRPK2;SRPK2	NM_182691;NM_182692	Body;Body
cg25883405	7	104865796	0.0315299	0.00966184	SRPK2;SRPK2	NM_182691;NM_182692	Body;Body
cg18041893	7	104869189	0.0161581	0.00126151	SRPK2;SRPK2	NM_182691;NM_182692	Body;Body
cg13950905	7	104869288	0.0263932	8.62e-05	SRPK2;SRPK2	NM_182691;NM_182692	Body;Body
cg17627973	7	104885248	-0.0162612	0.00148247	SRPK2;SRPK2	NM_182691;NM_182692	Body;Body	Island
cg21261709	7	104887042	0.0848082	9.9e-07	SRPK2;SRPK2	NM_182691;NM_182692	Body;Body	S_Shore
cg01776199	7	104892331	0.042774	0.00671884	SRPK2;SRPK2	NM_182691;NM_182692	Body;Body
cg15044010	7	104897205	0.04279	0.00196389	SRPK2;SRPK2	NM_182691;NM_182692	Body;Body
cg00365499	7	104909430	0.0347252	0.00242531	SRPK2;SRPK2;SRPK2	NM_182691;NM_182691;NM_182692	5'UTR;1stExon;Body
cg01580934	7	104909815	0.0505464	0.00018248	SRPK2;SRPK2	NM_182691;NM_182692	TSS1500;Body
cg02170577	7	104939331	0.023081	0.000802017	SRPK2	NM_182692	Body	N_Shelf
cg15857470	7	104945248	0.0893072	4.95e-09	SRPK2	NM_182692	Body	S_Shelf
cg02729030	7	110879415	0.0912943	7.14e-09	IMMP2L	NM_032549	Body
cg02787120	7	111200944	0.041327	0.00072808	IMMP2L	NM_032549	5'UTR	N_Shore
cg16056465	7	111202450	0.016423	0.0218841	IMMP2L	NM_032549	TSS200	Island
cg11019771	7	137085181	-0.0345795	2.75e-05	DGKI	NM_004717	Body
cg21666367	8	27450279	-0.0271483	0.00540202				S_Shore
cg24794833	8	27450748	-0.0137295	0.0120677				S_Shore
cg08579780	8	60609179	-0.017465	0.00367468
cg19913199	8	60674791	0.0144822	0.00570505
ch.8.89733515F	8	89664399	0.0441837	0.0305286
cg26177807	8	89688361	0.0228968	0.00623994
cg11534893	8	89688501	0.0080511	0.0298078
cg13925809	9	84646696	0.0504921	0.00028352
cg13729285	9	84764156	0.0816611	1.44e-07
cg03587042	10	18689035	0.0510534	0.00180119	CACNB2;CACNB2;CACNB2;CACNB2;CACNB2;CACNB2;CACNB2;CACNB2;CACNB2	NM_201571;NM_201593;NM_000724;NM_201597;NM_201570;NM_201572;NM_201590;NM_201596;NM_001167945	Body;Body;Body;Body;TSS1500;Body;Body;Body;Body
cg07262635	10	18689378	0.0633796	5.48e-07	CACNB2;CACNB2;CACNB2;CACNB2;CACNB2;CACNB2;CACNB2;CACNB2;CACNB2	NM_201571;NM_201593;NM_000724;NM_201597;NM_201572;NM_201570;NM_201590;NM_201596;NM_001167945	Body;Body;Body;Body;Body;TSS200;Body;Body;Body
cg25334928	10	18689430	0.0463639	8.1e-05	CACNB2;CACNB2;CACNB2;CACNB2;CACNB2;CACNB2;CACNB2;CACNB2;CACNB2	NM_201571;NM_201593;NM_000724;NM_201597;NM_201572;NM_201570;NM_201590;NM_201596;NM_001167945	Body;Body;Body;Body;Body;TSS200;Body;Body;Body
cg12289251	10	18689471	0.105354	0.000101478	CACNB2;CACNB2;CACNB2;CACNB2;CACNB2;CACNB2;CACNB2;CACNB2;CACNB2	NM_201571;NM_201593;NM_000724;NM_201597;NM_201572;NM_201570;NM_201590;NM_201596;NM_001167945	Body;Body;Body;Body;Body;TSS200;Body;Body;Body
cg24128066	10	18689503	0.0407922	3.46e-05	CACNB2;CACNB2;CACNB2;CACNB2;CACNB2;CACNB2;CACNB2;CACNB2;CACNB2	NM_201571;NM_201593;NM_000724;NM_201597;NM_201572;NM_201570;NM_201590;NM_201596;NM_001167945	Body;Body;Body;Body;Body;TSS200;Body;Body;Body
cg18534077	10	104628846	-0.0320779	0.00102002	AS3MT	NM_020682	TSS1500	N_Shore
cg25143771	10	104629124	-0.0256903	0.0183532	AS3MT	NM_020682	TSS200	Island
cg00894378	10	104680152	0.0259912	0.00516873	CNNM2;CNNM2;CNNM2	NM_199077;NM_199076;NM_017649	Body;Body;Body	S_Shore
cg14737131	10	104680354	0.0349639	0.00400446	CNNM2;CNNM2;CNNM2	NM_199077;NM_199076;NM_017649	Body;Body;Body	S_Shore
cg03493300	10	104813866	-0.0307817	5.44e-05	CNNM2;CNNM2	NM_199076;NM_017649	Body;Body
cg10521431	10	104814810	0.0375294	1.29e-05	CNNM2;CNNM2	NM_199076;NM_017649	Body;Body
cg06043500	10	104832122	0.00786359	0.0496926	CNNM2;CNNM2	NM_199076;NM_017649	Body;Body
cg18882449	10	104885122	0.0514055	0.00422421	NT5C2;NT5C2	NM_001134373;NM_012229	Body;Body
cg16236779	10	104905387	0.0141337	0.0317503	NT5C2;NT5C2	NM_001134373;NM_012229	Body;Body
cg09803321	10	104913480	0.0520075	5.19e-05	NT5C2;NT5C2	NM_001134373;NM_012229	Body;Body
cg10116432	10	104953276	0.0159813	0.0405431	NT5C2;NT5C2	NM_012229;NM_001134373	TSS1500;TSS1500	S_Shore
cg00035347	10	104953608	-0.0316189	0.00822596	NT5C2;NT5C2	NM_012229;NM_001134373	TSS1500;TSS1500	S_Shore
cg16396933	10	104954103	-0.023706	0.000249845	NT5C2;NT5C2	NM_012229;NM_001134373	TSS1500;TSS1500	S_Shore
cg10632966	10	105001051	-0.0142303	0.0247692
cg25462858	10	105032988	0.0253348	0.000914619				N_Shelf
cg18765542	11	46354101	0.027421	0.000555368	DGKZ	NM_201532	TSS1500	Island
cg04854089	11	46355137	0.0358036	6.2e-06	DGKZ	NM_201532	Body	Island
cg10059056	11	46355283	0.0180972	0.0252355	DGKZ	NM_201532	Body	S_Shore
cg09802018	11	46357562	-0.0819877	1.03e-09	DGKZ	NM_201532	Body	S_Shelf
cg22948808	11	46360763	-0.0359515	0.000791247	DGKZ	NM_201532	Body
cg20091215	11	46366419	-0.0120158	0.000288776	DGKZ;DGKZ	NM_201533;NM_201532	TSS1500;Body	N_Shore
cg06061966	11	46366643	-0.0347907	1.61e-05	DGKZ;DGKZ	NM_201533;NM_201532	TSS1500;Body	N_Shore
cg07998213	11	46366813	-0.0403016	1.74e-06	DGKZ;DGKZ	NM_201533;NM_201532	TSS200;Body	N_Shore
cg05576959	11	46366833	-0.0433848	1.37e-05	DGKZ;DGKZ	NM_201533;NM_201532	TSS200;Body	N_Shore
cg13247398	11	46366840	-0.0272157	5.18e-06	DGKZ;DGKZ	NM_201533;NM_201532	TSS200;Body	N_Shore
cg20029347	11	46366877	-0.0295021	0.000159192	DGKZ;DGKZ	NM_201533;NM_201532	TSS200;Body	Island
cg21663341	11	46366884	-0.0303577	0.000162982	DGKZ;DGKZ	NM_201533;NM_201532	TSS200;Body	Island
cg03519157	11	46367033	-0.0305562	8.46e-05	DGKZ;DGKZ;DGKZ	NM_201533;NM_201533;NM_201532	5'UTR;1stExon;Body	Island
cg20666386	11	46367100	-0.0254328	0.000287882	DGKZ;DGKZ	NM_201533;NM_201532	1stExon;Body	Island
cg07701241	11	46367812	-0.0364756	0.000377798	DGKZ;DGKZ;DGKZ	NM_201533;NM_003646;NM_201532	Body;TSS1500;Body	N_Shore
cg22675791	11	46370729	-0.0213507	0.0368696	DGKZ;DGKZ;DGKZ	NM_201533;NM_003646;NM_201532	Body;Body;Body	S_Shore
cg07092212	11	46382544	-0.0224574	0.00115485	DGKZ;DGKZ;DGKZ;DGKZ	NM_201533;NM_001105540;NM_003646;NM_201532	Body;TSS1500;Body;Body
cg01132064	11	46382562	-0.0256754	0.00138142	DGKZ;DGKZ;DGKZ;DGKZ	NM_201533;NM_001105540;NM_003646;NM_201532	Body;TSS1500;Body;Body
cg17266233	11	46382725	-0.0346616	0.000157889	DGKZ;DGKZ;DGKZ;DGKZ	NM_201533;NM_001105540;NM_003646;NM_201532	Body;TSS1500;Body;Body
cg07121644	11	46383031	0.0350007	0.00040037	DGKZ;DGKZ;DGKZ;DGKZ	NM_201533;NM_001105540;NM_003646;NM_201532	Body;TSS200;Body;Body
cg21770622	11	46383066	0.0345897	0.00025887	DGKZ;DGKZ;DGKZ;DGKZ	NM_201533;NM_001105540;NM_003646;NM_201532	Body;TSS200;Body;Body
cg02865822	11	46383141	0.060617	4.06e-06	DGKZ;DGKZ;DGKZ;DGKZ	NM_201533;NM_001105540;NM_003646;NM_201532	Body;TSS200;Body;Body
cg02211741	11	46383924	-0.0364733	9.28e-05	DGKZ;DGKZ;DGKZ;DGKZ	NM_201533;NM_001105540;NM_003646;NM_201532	Body;5'UTR;Body;Body	N_Shelf
cg26473110	11	46385365	0.0802472	6.55e-09	DGKZ;DGKZ;DGKZ;DGKZ	NM_201533;NM_001105540;NM_003646;NM_201532	Body;5'UTR;Body;Body	N_Shelf
cg14787093	11	46387834	-0.0263169	0.00078799	DGKZ;DGKZ;DGKZ;DGKZ	NM_001105540;NM_201533;NM_003646;NM_201532	Body;Body;Body;Body	N_Shore
cg01529068	11	46393519	-0.00737858	0.0267013	DGKZ;DGKZ;DGKZ;DGKZ	NM_001105540;NM_201533;NM_003646;NM_201532	Body;Body;Body;Body	N_Shelf
cg11436767	11	46401422	-0.0277998	0.000391761	MDK;DGKZ;DGKZ;DGKZ;DGKZ	NM_001012334;NM_001105540;NM_201533;NM_003646;NM_201532	TSS1500;Body;Body;Body;Body	N_Shore
cg07052627	11	46401447	-0.0348985	1.4e-07	MDK;DGKZ;DGKZ;DGKZ;DGKZ	NM_001012334;NM_001105540;NM_201533;NM_003646;NM_201532	TSS1500;Body;Body;Body;Body	N_Shore
cg06266097	11	46401702	-0.0165427	0.00782313	MDK;DGKZ;DGKZ;DGKZ;DGKZ	NM_001012334;NM_003646;NM_201533;NM_001105540;NM_201532	TSS1500;3'UTR;3'UTR;3'UTR;3'UTR	N_Shore
cg25448812	11	46402210	-0.035463	0.000414847	MDK;MDK;MDK	NM_001012334;NM_002391;NM_001012333	TSS1500;TSS1500;TSS1500	N_Shore
cg05506446	11	46409501	-0.0296561	3.76e-06	CHRM4	NM_000741	TSS1500	N_Shore
cg23283474	11	46450417	0.0155081	0.0113997	AMBRA1	NM_017749	Body
cg19784401	11	46457992	0.0698371	1.96e-05	AMBRA1	NM_017749	Body
cg27137887	11	46513635	0.0880787	1.91e-09	AMBRA1	NM_017749	Body
cg24886295	11	46526683	-0.0110912	0.0229026	AMBRA1	NM_017749	Body
cg20090290	11	46543695	0.0516562	0.000236998	AMBRA1	NM_017749	Body
cg01968525	11	46575582	-0.0463034	1.12e-05	AMBRA1	NM_017749	5'UTR
cg16660220	11	46576948	0.0835801	2.17e-08	AMBRA1	NM_017749	5'UTR
cg24374161	11	46582058	0.0210149	0.014516	AMBRA1	NM_017749	5'UTR
cg19244380	11	46612744	0.0875631	2.93e-07	AMBRA1;AMBRA1	NM_017749;NM_017749	5'UTR;1stExon	N_Shelf
cg15304308	11	46612932	0.0308506	0.00195219	AMBRA1	NM_017749	TSS200	N_Shelf
cg12699151	11	46639454	-0.0221596	0.00504366	KIAA0652;KIAA0652;KIAA0652;KIAA0652;HARBI1;KIAA0652	NR_024589;NR_024588;NR_024587;NM_014741;NM_173811;NM_001142673	Body;Body;Body;5'UTR;TSS1500;5'UTR	Island
cg26200378	11	46643408	0.0181503	0.00234607	KIAA0652;KIAA0652;KIAA0652;KIAA0652;KIAA0652	NR_024589;NR_024588;NR_024587;NM_014741;NM_001142673	Body;Body;Body;5'UTR;5'UTR	S_Shelf
cg24047711	11	46653059	0.042639	0.000183041	KIAA0652;KIAA0652;KIAA0652;KIAA0652;KIAA0652	NR_024589;NR_024588;NR_024587;NM_014741;NM_001142673	Body;Body;Body;5'UTR;5'UTR
cg20541870	11	46671034	0.0572867	0.00249836	KIAA0652;KIAA0652;KIAA0652;KIAA0652;KIAA0652	NR_024589;NR_024588;NR_024587;NM_014741;NM_001142673	Body;Body;Body;Body;Body
cg16389345	11	46697382	0.0618087	8.66e-07
cg15637527	11	46700234	0.0292942	0.00217606	ARHGAP1	NM_004308	3'UTR
cg27075419	11	46702601	0.015466	0.0392038	ARHGAP1	NM_004308	Body
cg27652459	11	46709238	0.057978	5.2e-06	ARHGAP1	NM_004308	Body
cg16676292	11	46718049	0.0743839	1.57e-07	ARHGAP1	NM_004308	5'UTR	N_Shelf
cg05433460	11	46720913	0.0533676	7.98e-08	ARHGAP1;ZNF408	NM_004308;NM_024741	5'UTR;TSS1500	N_Shore
cg25993851	11	46722334	-0.0127945	0.0240986	ARHGAP1;ZNF408	NM_004308;NM_024741	TSS1500;TSS200	Island
cg26184522	11	46722772	-0.0117692	0.00782313	ZNF408;ARHGAP1	NM_024741;NM_004308	Body;TSS1500	S_Shore
cg14716172	11	46724544	0.0837642	7.59e-08	ZNF408	NM_024741	Body	N_Shelf
cg05450701	11	46740703	0.0241799	0.00263076	F2	NM_000506	TSS200
cg00135888	11	57407543	-0.0205344	0.00571866	MIR130A	NR_029673	TSS1500
cg16520038	11	57408660	0.0235302	0.0141316	MIR130A	NR_029673	TSS200
cg14734340	11	57412660	-0.026451	0.000116604	YPEL4	NM_145008	3'UTR	N_Shore
cg27368025	11	57414401	-0.0562016	3.58e-06	YPEL4	NM_145008	Body	Island
cg10366093	11	57414457	-0.0659577	5.86e-07	YPEL4	NM_145008	Body	Island
cg15363887	11	57414557	-0.0438388	4.71e-05	YPEL4	NM_145008	Body	Island
cg03631561	11	57414626	-0.0413112	0.000361542	YPEL4	NM_145008	5'UTR	Island
cg11324116	11	57414908	-0.0399248	2.82e-05	YPEL4	NM_145008	5'UTR	S_Shore
cg03773647	11	57417949	0.0244363	0.00343716	YPEL4	NM_145008	TSS1500	S_Shelf
cg13473383	11	57434378	0.0141432	0.0390905	ZDHHC5	NM_015457	TSS1500	N_Shore
cg14814018	11	57482501	-0.0208756	0.0362331	TMX2;TMX2;TMX2	NM_015959;NM_001144012;NR_026593	Body;Body;Body	S_Shelf
cg19210276	11	57529465	0.0260537	0.0403003	CTNND1;CTNND1;CTNND1;CTNND1;CTNND1;CTNND1;CTNND1;CTNND1;CTNND1;CTNND1;CTNND1;CTNND1;CTNND1;CTNND1;CTNND1;CTNND1;CTNND1;CTNND1;CTNND1;CTNND1;CTNND1;CTNND1;CTNND1;CTNND1;CTNND1;CTNND1	NM_001085459;NM_001085462;NM_001085462;NM_001085463;NM_001085458;NM_001085461;NM_001085464;NM_001085467;NM_001085460;NM_001085469;NM_001085468;NM_001085465;NM_001085465;NM_001085468;NM_001085460;NM_001085466;NM_001085459;NM_001331;NM_001085467;NM_001331;NM_001085463;NM_001085464;NM_001085469;NM_001085458;NM_001085466;NM_001085461	5'UTR;1stExon;5'UTR;1stExon;1stExon;1stExon;1stExon;1stExon;5'UTR;1stExon;5'UTR;1stExon;5'UTR;1stExon;1stExon;5'UTR;1stExon;1stExon;5'UTR;5'UTR;5'UTR;5'UTR;5'UTR;5'UTR;1stExon;5'UTR
cg16127573	11	57532299	-0.0285537	0.00303471	CTNND1;CTNND1;CTNND1;CTNND1;CTNND1;CTNND1;CTNND1;CTNND1;CTNND1;CTNND1;CTNND1;CTNND1;CTNND1	NM_001085459;NM_001085467;NM_001085462;NM_001331;NM_001085460;NM_001085463;NM_001085468;NM_001085464;NM_001085465;NM_001085469;NM_001085458;NM_001085466;NM_001085461	5'UTR;5'UTR;5'UTR;5'UTR;5'UTR;5'UTR;5'UTR;5'UTR;5'UTR;5'UTR;5'UTR;5'UTR;5'UTR
cg00830817	11	109293614	0.0309244	0.0248836	C11orf87	NM_207645	5'UTR	Island
cg09059880	11	109295290	-0.0130702	0.0170183	C11orf87	NM_207645	3'UTR	S_Shore
cg11649795	11	109295491	-0.0330692	0.0463894	C11orf87	NM_207645	3'UTR	S_Shore
cg18248586	11	113329026	-0.0102757	0.0213645	DRD2;DRD2	NM_000795;NM_016574	5'UTR;5'UTR
cg22842860	11	113348189	0.0576317	2.91e-07				S_Shore
cg20424531	11	113348237	0.0306207	0.0306596				S_Shore
cg24868960	11	113403184	0.0988438	2.64e-08
cg04387924	11	113417579	0.0383538	4.59e-06
cg19182986	11	124613500	0.021516	0.0102916	NRGN;NRGN	NM_006176;NM_001126181	Body;Body	N_Shore
cg13812731	11	124615143	0.0250494	0.00433232	NRGN;NRGN	NM_006176;NM_001126181	Body;Body	N_Shore
cg26710209	11	124617409	0.0331641	0.0169419	VSIG2	NM_014312	3'UTR	S_Shore
cg14101442	11	130742236	0.0480061	0.000206739
cg22821947	11	133837401	-0.0296892	0.0153316
cg20042908	11	133852938	0.0364439	0.00025887
cg09436713	12	2323135	-0.0388958	3.93e-05	CACNA1C;CACNA1C;CACNA1C;CACNA1C;CACNA1C;CACNA1C;CACNA1C;CACNA1C;CACNA1C;CACNA1C;CACNA1C;CACNA1C;CACNA1C;CACNA1C;CACNA1C;CACNA1C;CACNA1C;CACNA1C;CACNA1C;CACNA1C;CACNA1C;CACNA1C;CACNA1C	NM_001129844;NM_001129827;NM_001129839;NM_001129834;NM_001129841;NM_000719;NM_001129830;NM_001167625;NM_001129843;NM_001167624;NM_001129835;NM_001129837;NM_001167623;NM_001129840;NM_199460;NM_001129833;NM_001129832;NM_001129829;NM_001129846;NM_001129836;NM_001129838;NM_001129831;NM_001129842	Body;Body;Body;Body;Body;Body;Body;Body;Body;Body;Body;Body;Body;Body;Body;Body;Body;Body;Body;Body;Body;Body;Body
cg27431037	12	2330387	-0.0447964	0.000114923	CACNA1C;CACNA1C;CACNA1C;CACNA1C;CACNA1C;CACNA1C;CACNA1C;CACNA1C;CACNA1C;CACNA1C;CACNA1C;CACNA1C;CACNA1C;CACNA1C;CACNA1C;CACNA1C;CACNA1C;CACNA1C;CACNA1C;CACNA1C;CACNA1C;CACNA1C;CACNA1C	NM_001129844;NM_001129827;NM_001129839;NM_001129834;NM_001129841;NM_000719;NM_001129830;NM_001167625;NM_001129843;NM_001167624;NM_001129835;NM_001129837;NM_001167623;NM_001129840;NM_199460;NM_001129833;NM_001129832;NM_001129829;NM_001129846;NM_001129836;NM_001129838;NM_001129831;NM_001129842	Body;Body;Body;Body;Body;Body;Body;Body;Body;Body;Body;Body;Body;Body;Body;Body;Body;Body;Body;Body;Body;Body;Body
cg20495738	12	2338399	-0.060526	1.4e-07	CACNA1C;CACNA1C;CACNA1C;CACNA1C;CACNA1C;CACNA1C;CACNA1C;CACNA1C;CACNA1C;CACNA1C;CACNA1C;CACNA1C;CACNA1C;CACNA1C;CACNA1C;CACNA1C;CACNA1C;CACNA1C;CACNA1C;CACNA1C;CACNA1C;CACNA1C;CACNA1C	NM_001129844;NM_001129827;NM_001129839;NM_001129834;NM_001129841;NM_000719;NM_001129830;NM_001167625;NM_001129843;NM_001167624;NM_001129835;NM_001129837;NM_001167623;NM_001129840;NM_199460;NM_001129833;NM_001129832;NM_001129829;NM_001129846;NM_001129836;NM_001129838;NM_001129831;NM_001129842	Body;Body;Body;Body;Body;Body;Body;Body;Body;Body;Body;Body;Body;Body;Body;Body;Body;Body;Body;Body;Body;Body;Body	N_Shore
cg26999577	12	2340831	0.0575419	2.98e-05	CACNA1C;CACNA1C;CACNA1C;CACNA1C;CACNA1C;CACNA1C;CACNA1C;CACNA1C;CACNA1C;CACNA1C;CACNA1C;CACNA1C;CACNA1C;CACNA1C;CACNA1C;CACNA1C;CACNA1C;CACNA1C;CACNA1C;CACNA1C;CACNA1C;CACNA1C;CACNA1C	NM_001129844;NM_001129827;NM_001129839;NM_001129834;NM_001129841;NM_000719;NM_001129830;NM_001167625;NM_001129843;NM_001167624;NM_001129835;NM_001129837;NM_001167623;NM_001129840;NM_199460;NM_001129833;NM_001129832;NM_001129829;NM_001129846;NM_001129836;NM_001129838;NM_001129831;NM_001129842	Body;Body;Body;Body;Body;Body;Body;Body;Body;Body;Body;Body;Body;Body;Body;Body;Body;Body;Body;Body;Body;Body;Body	S_Shore
cg11046772	12	2353479	-0.0434682	1.71e-06	CACNA1C;CACNA1C;CACNA1C;CACNA1C;CACNA1C;CACNA1C;CACNA1C;CACNA1C;CACNA1C;CACNA1C;CACNA1C;CACNA1C;CACNA1C;CACNA1C;CACNA1C;CACNA1C;CACNA1C;CACNA1C;CACNA1C;CACNA1C;CACNA1C;CACNA1C;CACNA1C	NM_001129844;NM_001129827;NM_001129839;NM_001129834;NM_001129841;NM_000719;NM_001129830;NM_001167625;NM_001129843;NM_001167624;NM_001129835;NM_001129837;NM_001167623;NM_001129840;NM_199460;NM_001129833;NM_001129832;NM_001129829;NM_001129846;NM_001129836;NM_001129838;NM_001129831;NM_001129842	Body;Body;Body;Body;Body;Body;Body;Body;Body;Body;Body;Body;Body;Body;Body;Body;Body;Body;Body;Body;Body;Body;Body
cg21269738	12	2356703	-0.0105076	0.00416819	CACNA1C;CACNA1C;CACNA1C;CACNA1C;CACNA1C;CACNA1C;CACNA1C;CACNA1C;CACNA1C;CACNA1C;CACNA1C;CACNA1C;CACNA1C;CACNA1C;CACNA1C;CACNA1C;CACNA1C;CACNA1C;CACNA1C;CACNA1C;CACNA1C;CACNA1C;CACNA1C	NM_001129844;NM_001129827;NM_001129839;NM_001129834;NM_001129841;NM_000719;NM_001129830;NM_001167625;NM_001129843;NM_001167624;NM_001129835;NM_001129837;NM_001167623;NM_001129840;NM_199460;NM_001129833;NM_001129832;NM_001129829;NM_001129846;NM_001129836;NM_001129838;NM_001129831;NM_001129842	Body;Body;Body;Body;Body;Body;Body;Body;Body;Body;Body;Body;Body;Body;Body;Body;Body;Body;Body;Body;Body;Body;Body
cg03923850	12	2372169	-0.0097185	0.00640865	CACNA1C;CACNA1C;CACNA1C;CACNA1C;CACNA1C;CACNA1C;CACNA1C;CACNA1C;CACNA1C;CACNA1C;CACNA1C;CACNA1C;CACNA1C;CACNA1C;CACNA1C;CACNA1C;CACNA1C;CACNA1C;CACNA1C;CACNA1C;CACNA1C;CACNA1C;CACNA1C	NM_001129844;NM_001129827;NM_001129839;NM_001129834;NM_001129841;NM_000719;NM_001129830;NM_001167625;NM_001129843;NM_001167624;NM_001129835;NM_001129837;NM_001167623;NM_001129840;NM_199460;NM_001129833;NM_001129832;NM_001129829;NM_001129846;NM_001129836;NM_001129838;NM_001129831;NM_001129842	Body;Body;Body;Body;Body;Body;Body;Body;Body;Body;Body;Body;Body;Body;Body;Body;Body;Body;Body;Body;Body;Body;Body
cg26794883	12	2376330	-0.0202742	0.00499858	CACNA1C;CACNA1C;CACNA1C;CACNA1C;CACNA1C;CACNA1C;CACNA1C;CACNA1C;CACNA1C;CACNA1C;CACNA1C;CACNA1C;CACNA1C;CACNA1C;CACNA1C;CACNA1C;CACNA1C;CACNA1C;CACNA1C;CACNA1C;CACNA1C;CACNA1C;CACNA1C	NM_001129844;NM_001129827;NM_001129839;NM_001129834;NM_001129841;NM_000719;NM_001129830;NM_001167625;NM_001129843;NM_001167624;NM_001129835;NM_001129837;NM_001167623;NM_001129840;NM_199460;NM_001129833;NM_001129832;NM_001129829;NM_001129846;NM_001129836;NM_001129838;NM_001129831;NM_001129842	Body;Body;Body;Body;Body;Body;Body;Body;Body;Body;Body;Body;Body;Body;Body;Body;Body;Body;Body;Body;Body;Body;Body
cg16303353	12	2393684	-0.05068	1.24e-06	CACNA1C;CACNA1C;CACNA1C;CACNA1C;CACNA1C;CACNA1C;CACNA1C;CACNA1C;CACNA1C;CACNA1C;CACNA1C;CACNA1C;CACNA1C;CACNA1C;CACNA1C;CACNA1C;CACNA1C;CACNA1C;CACNA1C;CACNA1C;CACNA1C;CACNA1C;CACNA1C	NM_001129844;NM_001129827;NM_001129839;NM_001129834;NM_001129841;NM_000719;NM_001129830;NM_001167625;NM_001129843;NM_001167624;NM_001129835;NM_001129837;NM_001167623;NM_001129840;NM_199460;NM_001129833;NM_001129832;NM_001129829;NM_001129846;NM_001129836;NM_001129838;NM_001129831;NM_001129842	Body;Body;Body;Body;Body;Body;Body;Body;Body;Body;Body;Body;Body;Body;Body;Body;Body;Body;Body;Body;Body;Body;Body
cg02468320	12	2404134	-0.0278212	0.00048775	CACNA1C;CACNA1C;CACNA1C;CACNA1C;CACNA1C;CACNA1C;CACNA1C;CACNA1C;CACNA1C;CACNA1C;CACNA1C;CACNA1C;CACNA1C;CACNA1C;CACNA1C;CACNA1C;CACNA1C;CACNA1C;CACNA1C;CACNA1C;CACNA1C;CACNA1C;CACNA1C	NM_001129844;NM_001129827;NM_001129839;NM_001129834;NM_001129841;NM_000719;NM_001129830;NM_001167625;NM_001129843;NM_001167624;NM_001129835;NM_001129837;NM_001167623;NM_001129840;NM_199460;NM_001129833;NM_001129832;NM_001129829;NM_001129846;NM_001129836;NM_001129838;NM_001129831;NM_001129842	Body;Body;Body;Body;Body;Body;Body;Body;Body;Body;Body;Body;Body;Body;Body;Body;Body;Body;Body;Body;Body;Body;Body
cg14637685	12	2411116	-0.0290958	0.000166448	CACNA1C;CACNA1C;CACNA1C;CACNA1C;CACNA1C;CACNA1C;CACNA1C;CACNA1C;CACNA1C;CACNA1C;CACNA1C;CACNA1C;CACNA1C;CACNA1C;CACNA1C;CACNA1C;CACNA1C;CACNA1C;CACNA1C;CACNA1C;CACNA1C;CACNA1C;CACNA1C	NM_001129844;NM_001129827;NM_001129839;NM_001129834;NM_001129841;NM_000719;NM_001129830;NM_001167625;NM_001129843;NM_001167624;NM_001129835;NM_001129837;NM_001167623;NM_001129840;NM_199460;NM_001129833;NM_001129832;NM_001129829;NM_001129846;NM_001129836;NM_001129838;NM_001129831;NM_001129842	Body;Body;Body;Body;Body;Body;Body;Body;Body;Body;Body;Body;Body;Body;Body;Body;Body;Body;Body;Body;Body;Body;Body
cg17574877	12	2505548	-0.0308171	1.02e-05	CACNA1C;CACNA1C;CACNA1C;CACNA1C;CACNA1C;CACNA1C;CACNA1C;CACNA1C;CACNA1C;CACNA1C;CACNA1C;CACNA1C;CACNA1C;CACNA1C;CACNA1C;CACNA1C;CACNA1C;CACNA1C;CACNA1C;CACNA1C;CACNA1C;CACNA1C;CACNA1C	NM_001129844;NM_001129827;NM_001129839;NM_001129834;NM_001129841;NM_000719;NM_001129830;NM_001167625;NM_001129843;NM_001167624;NM_001129835;NM_001129837;NM_001167623;NM_001129840;NM_199460;NM_001129833;NM_001129832;NM_001129829;NM_001129846;NM_001129836;NM_001129838;NM_001129831;NM_001129842	Body;Body;Body;Body;Body;Body;Body;Body;Body;Body;Body;Body;Body;Body;Body;Body;Body;Body;Body;Body;Body;Body;Body
cg23369234	12	2511478	-0.0207978	0.0466888	CACNA1C;CACNA1C;CACNA1C;CACNA1C;CACNA1C;CACNA1C;CACNA1C;CACNA1C;CACNA1C;CACNA1C;CACNA1C;CACNA1C;CACNA1C;CACNA1C;CACNA1C;CACNA1C;CACNA1C;CACNA1C;CACNA1C;CACNA1C;CACNA1C;CACNA1C;CACNA1C	NM_001129844;NM_001129827;NM_001129839;NM_001129834;NM_001129841;NM_000719;NM_001129830;NM_001167625;NM_001129843;NM_001167624;NM_001129835;NM_001129837;NM_001167623;NM_001129840;NM_199460;NM_001129833;NM_001129832;NM_001129829;NM_001129846;NM_001129836;NM_001129838;NM_001129831;NM_001129842	Body;Body;Body;Body;Body;Body;Body;Body;Body;Body;Body;Body;Body;Body;Body;Body;Body;Body;Body;Body;Body;Body;Body
cg26479868	12	29916194	0.0771325	5.24e-06	TMTC1	NM_175861	Body
cg13318543	12	29932047	-0.0175348	0.000968783	TMTC1	NM_175861	5'UTR	N_Shelf
cg09526236	12	29937733	-0.0240359	0.0248411	TMTC1	NM_175861	TSS200	S_Shore
cg24947456	12	57441432	-0.0221457	0.00220415	MYO1A	NM_005379	Body
cg14777342	12	57480090	-0.0280152	0.0288122				N_Shore
cg01756730	12	57483513	-0.0218514	0.00512809	NAB2	NM_005967	Body	S_Shore
cg14574369	12	57483631	-0.0302064	0.000225369	NAB2	NM_005967	Body	S_Shore
cg19311889	12	57483793	-0.0961399	0.000327175	NAB2	NM_005967	Body	S_Shore
cg23550060	12	57484316	-0.0334661	0.00104589	NAB2	NM_005967	Body	S_Shore
cg02138198	12	57485116	0.0336939	5.26e-05	NAB2	NM_005967	Body	S_Shelf
cg01276169	12	57569898	0.0231917	0.0239209	LRP1	NM_002332	Body	Island
cg11813198	12	57572413	0.0530901	5.37e-07	LRP1	NM_002332	Body	S_Shelf
cg12385849	12	57580442	-0.00965665	0.0113997	LRP1	NM_002332	Body	S_Shore
cg04688889	12	57581972	-0.0124414	0.0298078	LRP1	NM_002332	Body	S_Shelf
cg16521032	12	57587714	-0.00799991	0.00622135	MIR1228;LRP1	NR_031597;NM_002332	TSS1500;Body
cg05776138	12	57587773	-0.0202524	0.0117761	MIR1228;LRP1	NR_031597;NM_002332	TSS1500;Body
cg09686672	12	57589253	0.0816877	3.66e-09	LRP1	NM_002332	Body
cg19504001	12	57589740	0.0212038	0.00961668	LRP1	NM_002332	Body
cg25664021	12	57595357	0.0197324	0.0115948	LRP1	NM_002332	Body	N_Shore
cg05225089	12	57595554	-0.0443582	5.48e-07	LRP1	NM_002332	Body	N_Shore
cg13477548	12	57595592	-0.0226788	1.21e-05	LRP1	NM_002332	Body	N_Shore
cg05584118	12	57595605	-0.0357599	7.33e-05	LRP1	NM_002332	Body	N_Shore
cg06269919	12	57597136	-0.0754626	6e-09	LRP1	NM_002332	Body	Island
cg02770683	12	57597238	-0.0322549	8.66e-07	LRP1	NM_002332	Body	Island
cg16612926	12	57601671	-0.0428308	1.9e-05	LRP1	NM_002332	Body
cg07281948	12	57601935	-0.0166082	0.012658	LRP1	NM_002332	Body
cg11468462	12	57610686	-0.015268	0.0495376	NXPH4;NXPH4	NM_007224;NM_007224	5'UTR;1stExon	Island
cg03921149	12	57614100	0.0291967	0.00267214	NXPH4	NM_007224	Body	S_Shelf
cg12502577	12	57615581	0.0348443	0.0171468	NXPH4	NM_007224	Body	N_Shelf
cg11505661	12	57618965	0.0219216	0.0188876	NXPH4	NM_007224	Body	Island
cg26396455	12	57619290	0.0481779	0.0201203	NXPH4	NM_007224	Body	Island
cg05835276	12	57619364	0.0357874	0.0077788	NXPH4	NM_007224	Body	Island
cg17651972	12	57620054	-0.0199853	0.00274843	NXPH4	NM_007224	3'UTR	S_Shore
cg03052162	12	57622963	-0.0309517	0.00422421	SHMT2;SHMT2;SHMT2;SHMT2;SHMT2;SHMT2;SHMT2;SHMT2	NM_005412;NR_029416;NR_029415;NM_001166358;NM_001166357;NM_001166356;NM_001166359;NR_029417	TSS1500;TSS1500;TSS1500;TSS1500;TSS1500;TSS1500;TSS1500;TSS1500	N_Shore
cg25110782	12	57624371	-0.0198944	0.013508	SHMT2;SHMT2;SHMT2;SHMT2;SHMT2;SHMT2;SHMT2;SHMT2;SHMT2	NM_001166357;NM_001166358;NM_001166357;NR_029415;NM_001166356;NM_001166359;NM_005412;NR_029417;NR_029416	1stExon;5'UTR;5'UTR;Body;Body;5'UTR;Body;Body;Body	S_Shore
cg11851129	12	57624530	-0.0229396	0.00719159	SHMT2;SHMT2;SHMT2;SHMT2;SHMT2;SHMT2;SHMT2;SHMT2	NM_005412;NM_001166359;NR_029417;NM_001166358;NM_001166357;NR_029415;NM_001166356;NR_029416	Body;5'UTR;Body;5'UTR;5'UTR;Body;Body;Body	S_Shore
cg19535267	12	57625610	-0.0281624	4.28e-05	SHMT2;SHMT2;SHMT2;SHMT2;SHMT2;SHMT2;SHMT2;SHMT2	NM_001166358;NM_005412;NM_001166357;NR_029417;NR_029415;NM_001166359;NM_001166356;NR_029416	Body;Body;Body;Body;Body;Body;Body;Body	S_Shore
cg08163918	12	57628654	-0.00880556	0.0294195	SHMT2;SHMT2;SHMT2;SHMT2;SHMT2;SHMT2;SHMT2;SHMT2	NM_001166359;NR_029415;NM_001166356;NM_001166358;NM_005412;NR_029417;NM_001166357;NR_029416	3'UTR;Body;3'UTR;3'UTR;3'UTR;Body;3'UTR;Body	N_Shore
cg01754267	12	57629240	-0.0120793	0.0434238	NDUFA4L2	NM_020142	3'UTR	N_Shore
cg10625931	12	57632417	0.0219895	0.00068431	NDUFA4L2	NM_020142	5'UTR	Island
cg12643378	12	57634855	0.021732	0.0277689	NDUFA4L2	NM_020142	TSS1500	N_Shore
cg11100309	12	57637268	-0.0155985	0.0436479	STAC3	NM_145064	3'UTR	Island
cg21045306	12	57637925	-0.0255941	0.00517382	STAC3	NM_145064	Body	S_Shore
cg10430362	12	57647700	-0.0242034	0.0373605	R3HDM2	NM_014925	3'UTR
cg18473642	12	123449186	-0.0148804	0.0290719	ABCB9;ABCB9;ABCB9	NM_203444;NM_019624;NM_019625	5'UTR;5'UTR;5'UTR	N_Shore
cg07949141	12	123451874	-0.0142261	0.00862839	ABCB9;ABCB9;ABCB9	NM_203444;NM_019625;NM_019624	5'UTR;TSS1500;TSS1500	S_Shore
cg16427983	12	123453858	0.110611	1.74e-10	ABCB9	NM_203444	5'UTR	S_Shelf
cg21745287	12	123464511	0.0250119	0.00978575	ARL6IP4;ARL6IP4;OGFOD2;ARL6IP4;ARL6IP4	NM_018694;NM_001002251;NM_024623;NM_016638;NM_001002252	TSS1500;TSS1500;3'UTR;TSS1500;TSS1500	N_Shore
cg15243578	12	123469284	0.0298879	0.029622	PITPNM2	NM_020845	3'UTR	N_Shore
cg09931783	12	123469669	-0.0446309	3.7e-05	PITPNM2	NM_020845	3'UTR	N_Shore
cg01311567	12	123470623	-0.0176321	5.62e-06	PITPNM2	NM_020845	Body	Island
cg12812394	12	123473974	-0.0103366	0.0344993	PITPNM2	NM_020845	Body	S_Shelf
cg13037550	12	123477107	0.0190195	0.00267922	PITPNM2	NM_020845	Body
cg17811874	12	123485314	-0.00699183	0.0317503	PITPNM2	NM_020845	Body	S_Shelf
cg14644204	12	123518833	-0.0375617	0.000361513	PITPNM2	NM_020845	Body
cg01816936	12	123518888	-0.0233477	0.00295461	PITPNM2	NM_020845	Body
cg08176694	12	123519157	-0.037942	4.2e-05	PITPNM2	NM_020845	5'UTR
cg00989258	12	123527156	-0.0129038	0.0123013	PITPNM2	NM_020845	5'UTR
cg08464009	12	123535067	-0.0192886	0.0146041	PITPNM2	NM_020845	5'UTR
cg05384139	12	123548027	-0.033936	1.34e-06	PITPNM2	NM_020845	5'UTR
cg05399718	12	123555535	-0.0375175	1.81e-05	PITPNM2	NM_020845	5'UTR
cg05132828	12	123560479	-0.0394839	6.93e-06	PITPNM2	NM_020845	5'UTR
cg16085171	12	123569118	-0.0145045	5.94e-06	PITPNM2	NM_020845	5'UTR
cg14858784	12	123579358	0.0250033	0.000694829	PITPNM2	NM_020845	5'UTR
cg05915139	12	123582277	0.0495207	1.57e-07	PITPNM2	NM_020845	5'UTR
cg01973483	12	123591123	-0.0319012	4.17e-08	PITPNM2	NM_020845	5'UTR
cg19120225	12	123595024	-0.0133746	0.0102409	PITPNM2	NM_020845	TSS200
cg06742321	12	123595122	-0.0122588	0.0178546	PITPNM2	NM_020845	TSS200
cg25801622	12	123596413	-0.0498895	2.64e-08	PITPNM2	NM_020845	TSS1500
cg19515108	12	123599873	-0.035343	0.00012413
cg21249708	12	123601893	-0.0091722	0.0323102
cg27422311	12	123626132	-0.0405549	0.000116604
cg24619895	12	123633728	0.0466566	1.96e-05				N_Shore
cg12598211	12	123634384	-0.0206638	0.00126151				N_Shore
cg27473871	12	123636279	-0.026591	0.017802				S_Shore
cg02948656	12	123636505	-0.0129103	0.00591369				S_Shore
cg15175608	12	123636717	-0.0152292	4.58e-05				S_Shore
cg18014789	12	123717788	0.0377331	0.000671812	C12orf65;C12orf65	NM_152269;NM_001143905	TSS200;TSS1500	Island
cg10672416	12	123718706	-0.0572159	1.18e-05	C12orf65;C12orf65	NM_001143905;NM_152269	5'UTR;5'UTR	S_Shore
cg16138158	12	123727023	-0.0596946	0.00490754	C12orf65;C12orf65	NM_001143905;NM_152269	5'UTR;5'UTR
cg14790739	12	123750827	-0.0490675	1.14e-08	CDK2AP1	NM_004642	Body	N_Shelf
cg25630910	12	123753186	0.0263736	6.22e-05	CDK2AP1	NM_004642	Body	N_Shore
cg14844236	12	123753212	0.0307907	0.00304775	CDK2AP1	NM_004642	Body	N_Shore
cg20181887	12	123753272	0.0595571	0.000371959	CDK2AP1	NM_004642	Body	N_Shore
cg04844995	12	123757413	0.0174922	0.0316465	CDK2AP1	NM_004642	TSS1500	S_Shore
cg26804387	12	123758006	-0.0304766	0.00141901	CDK2AP1	NM_004642	TSS1500	S_Shore
cg14017077	12	123758062	-0.0716476	2.86e-06	CDK2AP1	NM_004642	TSS1500	S_Shore
cg23749536	12	123775040	0.0570381	7.97e-08	SBNO1;SBNO1	NM_018183;NM_001167856	3'UTR;3'UTR
cg05677062	12	123874707	-0.0293344	0.00102906	SETD8	NM_020382	Body	S_Shore
cg18603577	12	123900102	-0.0402381	0.000128411	RILPL2	NM_145058	3'UTR
cg05266474	14	99708736	-0.035501	0.00425347	BCL11B;BCL11B	NM_022898;NM_138576	Body;Body	N_Shelf
cg16126665	14	99711752	-0.0270906	0.0024183	BCL11B;BCL11B	NM_022898;NM_138576	Body;Body	N_Shore
cg07675477	14	99711840	-0.0393556	0.000427092	BCL11B;BCL11B	NM_022898;NM_138576	Body;Body	Island
cg05100282	14	99713430	-0.0458468	6.63e-06	BCL11B;BCL11B	NM_022898;NM_138576	Body;Body	Island
cg14204600	14	104000460	0.02382	0.0091301	TRMT61A	NM_152307	Body	N_Shore
cg10395934	14	104002654	-0.0173992	0.00196437	TRMT61A	NM_152307	3'UTR	S_Shore
cg09975044	14	104007538	0.047981	0.00358303
cg23335576	14	104009727	0.0549017	7.12e-06
cg10040530	14	104010839	0.0278187	0.00725079
cg04561727	14	104010865	0.0404848	0.000117094
cg25939020	14	104012008	0.013154	0.00819434
cg20485781	14	104018735	-0.0296044	0.00117994
cg24682159	14	104026912	0.0176519	0.00504366	BAG5;BAG5;BAG5	NM_001015049;NM_001015048;NM_004873	Body;Body;Body	N_Shore
cg00889356	14	104026955	0.00832201	0.0142785	BAG5;BAG5;BAG5	NM_001015049;NM_001015048;NM_004873	Body;Body;Body	N_Shore
cg12944183	14	104073931	0.0342366	0.00012413
cg07495704	14	104091483	-0.0350429	1.83e-05				N_Shelf
cg23090046	14	104094619	-0.0224839	0.00896819	KLC1;KLC1;KLC1	NM_005552;NM_182923;NM_001130107	TSS1500;TSS1500;TSS1500	Island
cg08241321	14	104129064	-0.00915986	0.0202523	KLC1;KLC1;KLC1	NM_005552;NM_182923;NM_001130107	Body;Body;Body
cg07140250	14	104151427	0.0239599	0.000283643	KLC1;KLC1;KLC1	NM_182923;NM_001130107;NM_005552	Body;Body;3'UTR
cg07502782	14	104152058	-0.0104992	0.0118735	KLC1;KLC1;KLC1	NM_182923;NM_001130107;NM_005552	Body;Body;3'UTR
cg26318872	14	104158729	-0.0164724	0.00269153	KLC1;KLC1	NM_182923;NM_001130107	Body;Body
cg23470598	14	104161211	-0.0494646	1.04e-07	KLC1;KLC1	NM_182923;NM_001130107	Body;Body	N_Shelf
cg15374515	14	104161248	-0.0430708	1.28e-07	KLC1;KLC1	NM_182923;NM_001130107	Body;Body	N_Shelf
cg07110232	14	104164402	0.0229641	0.0145024	XRCC3;XRCC3;XRCC3;KLC1;KLC1	NM_001100119;NM_005432;NM_001100118;NM_182923;NM_001130107	3'UTR;3'UTR;3'UTR;Body;Body	N_Shore
cg01181105	14	104165277	-0.0234842	6.23e-05	XRCC3;XRCC3;XRCC3;KLC1;KLC1	NM_001100119;NM_005432;NM_001100118;NM_182923;NM_001130107	Body;Body;Body;Body;Body	Island
cg14172849	14	104171259	-0.0339408	2.77e-06	XRCC3;XRCC3;XRCC3	NM_001100119;NM_005432;NM_001100118	Body;Body;Body
cg02194129	14	104171313	-0.0190812	0.000461629	XRCC3;XRCC3;XRCC3	NM_001100119;NM_005432;NM_001100118	Body;Body;Body
cg27170268	14	104171695	-0.0326886	0.00141901	XRCC3;XRCC3;XRCC3	NM_001100119;NM_005432;NM_001100118	Body;Body;Body
cg12798040	14	104171840	-0.0329312	4.19e-06	XRCC3;XRCC3;XRCC3	NM_001100119;NM_005432;NM_001100118	Body;Body;Body
cg23369670	14	104171944	-0.0246856	0.000742483	XRCC3;XRCC3;XRCC3	NM_001100119;NM_005432;NM_001100118	Body;Body;Body
cg23702848	14	104172109	-0.0242232	0.00728828	XRCC3;XRCC3;XRCC3	NM_001100119;NM_005432;NM_001100118	Body;Body;Body
cg00995807	14	104172224	-0.0178603	0.00125716	XRCC3;XRCC3;XRCC3	NM_001100119;NM_005432;NM_001100118	Body;Body;Body
cg00845775	14	104172974	-0.0235719	5.94e-05	XRCC3;XRCC3;XRCC3	NM_001100119;NM_005432;NM_001100118	Body;Body;Body
cg23861457	14	104173299	-0.0214394	0.000149506	XRCC3;XRCC3;XRCC3	NM_001100119;NM_005432;NM_001100118	Body;Body;Body
cg02259047	14	104175555	0.0220782	0.0323102	XRCC3;XRCC3;XRCC3	NM_001100119;NM_005432;NM_001100118	Body;Body;Body
cg10347949	14	104175748	0.0230933	0.020974	XRCC3;XRCC3;XRCC3	NM_001100119;NM_005432;NM_001100118	Body;Body;Body
cg09922085	14	104175768	0.0294024	0.00703194	XRCC3;XRCC3;XRCC3	NM_001100119;NM_005432;NM_001100118	Body;Body;Body
cg19828748	14	104175847	0.0416383	0.000101478	XRCC3;XRCC3;XRCC3	NM_001100119;NM_005432;NM_001100118	Body;Body;Body
cg05182418	14	104176381	-0.0108386	0.0333193	XRCC3;XRCC3;XRCC3	NM_001100119;NM_005432;NM_001100118	Body;Body;Body
cg18597188	14	104178670	0.0243808	0.00762527	XRCC3;XRCC3;XRCC3	NM_001100118;NM_001100119;NM_005432	5'UTR;5'UTR;5'UTR	N_Shelf
cg21787568	14	104182951	-0.0230726	0.00725569	ZFYVE21;XRCC3;XRCC3;XRCC3	NM_024071;NM_001100118;NM_001100119;NM_005432	Body;TSS1500;TSS1500;TSS1500	Island
cg02943420	14	104183509	-0.0202193	0.000190291	ZFYVE21	NM_024071	Body	S_Shore
cg10316525	15	40572137	-0.0321538	2.04e-06				Island
cg20079298	15	40572326	-0.0700162	2.77e-06				Island
cg19143959	15	40572794	-0.0392506	9.07e-06				N_Shore
cg05777052	15	40573419	-0.0134641	0.0186104				N_Shore
cg10849092	15	40574697	0.0162168	0.0109351				Island
cg06020164	15	40577325	0.0601063	7.97e-08				S_Shore
cg08779207	15	40586496	-0.0156764	0.0146375	PLCB2	NM_004573	Body	S_Shelf
cg16543027	15	40599680	-0.0343043	0.000274159	PLCB2	NM_004573	Body
cg16567056	15	40599985	-0.0417329	9.64e-06	PLCB2;PLCB2	NM_004573;NM_004573	1stExon;5'UTR
cg05884705	15	40600099	-0.0309661	0.000379796	PLCB2;PLCB2	NM_004573;NM_004573	1stExon;5'UTR
cg25210134	15	40600265	-0.0384256	6.26e-06	PLCB2	NM_004573	TSS200
cg05547778	15	40600279	-0.0274551	5.19e-05	PLCB2	NM_004573	TSS200
cg14076977	15	40600284	-0.0251697	0.000129877	PLCB2	NM_004573	TSS200
cg21931938	15	40600493	-0.0276984	0.00097972	PLCB2	NM_004573	TSS1500
cg26232412	15	40600635	-0.0151251	0.0498121	PLCB2	NM_004573	TSS1500
cg02240622	15	40601467	-0.0165657	0.0267013	PLCB2	NM_004573	TSS1500
ch.15.59620222F	15	61832930	0.0371375	0.00115485
cg19696491	15	78857124	-0.0126447	0.0104848	CHRNA5	NM_000745	TSS1500	N_Shore
cg26678012	15	78857577	-0.0152657	0.023415	CHRNA5	NM_000745	TSS1500	N_Shore
cg08701566	15	78911099	-0.0287913	0.00783628	CHRNA3;CHRNA3	NM_000743;NM_001166694	Body;Body	N_Shore
cg19993258	15	78914264	-0.00866145	0.0369766	CHRNA3;CHRNA3	NM_000743;NM_001166694	TSS1500;TSS1500	S_Shore
cg12057576	15	78918529	-0.0247385	0.00290675	CHRNB4	NM_000750	Body
cg01631454	15	84748333	0.0278145	0.0496224				N_Shore
cg06813100	15	84974881	0.0376133	0.000918466				N_Shore
cg01173291	15	85144040	0.00797826	0.0370538	ZSCAN2;ZSCAN2;ZSCAN2	NM_181877;NM_017894;NM_001007072	TSS1500;TSS1500;TSS1500	N_Shore
cg21380294	15	85144807	-0.0205666	0.0186104	ZSCAN2;ZSCAN2;ZSCAN2	NM_001007072;NM_181877;NM_017894	5'UTR;5'UTR;5'UTR	S_Shore
cg22145651	15	91419540	-0.0093003	0.0226684	FURIN	NM_002569	Body	N_Shelf
cg24888049	15	91426667	-0.0255205	0.00294885	FES;FURIN;FES	NM_002005;NM_002569;NM_001143785	TSS1500;3'UTR;TSS1500	N_Shore
cg25647583	15	91427184	-0.0558592	2.64e-08	FES;FES;FES;FES	NM_002005;NM_001143783;NM_001143784;NM_001143785	TSS1500;TSS1500;TSS1500;TSS1500	N_Shore
cg09397246	15	91427361	-0.0440636	6.51e-06	FES;FES;FES;FES	NM_002005;NM_001143783;NM_001143784;NM_001143785	TSS1500;TSS1500;TSS1500;TSS1500	N_Shore
cg26405020	15	91427363	-0.044952	5.14e-06	FES;FES;FES;FES	NM_002005;NM_001143783;NM_001143784;NM_001143785	TSS1500;TSS1500;TSS1500;TSS1500	N_Shore
cg03209642	15	91427605	0.0504829	0.00792184	FES;FES;FES;FES	NM_002005;NM_001143783;NM_001143784;NM_001143785	TSS200;TSS1500;TSS1500;TSS200	Island
cg05211768	15	91427848	-0.0488305	0.0400619	FES;FES;FES;FES	NM_002005;NM_001143783;NM_001143785;NM_001143784	5'UTR;TSS1500;5'UTR;TSS1500	Island
cg04510874	15	91427884	-0.0330524	0.00385162	FES;FES;FES;FES	NM_002005;NM_001143783;NM_001143785;NM_001143784	5'UTR;TSS1500;5'UTR;TSS1500	Island
cg18661868	15	91427965	-0.0312846	0.000671812	FES;FES;FES;FES	NM_002005;NM_001143783;NM_001143785;NM_001143784	5'UTR;TSS1500;5'UTR;TSS1500	S_Shore
cg05180856	15	91428056	-0.0420787	8.74e-05	FES;FES;FES;FES	NM_002005;NM_001143783;NM_001143785;NM_001143784	5'UTR;TSS1500;5'UTR;TSS1500	S_Shore
cg06330618	15	91428456	-0.025291	0.000379524	FES;FES;FES;FES	NM_001143783;NM_001143784;NM_001143785;NM_002005	1stExon;1stExon;Body;Body	S_Shore
cg03616148	16	9911529	0.0260387	0.00234607	GRIN2A;GRIN2A;GRIN2A	NM_001134407;NM_000833;NM_001134408	Body;Body;Body
cg16783478	16	9943657	-0.0135894	0.00674224	GRIN2A;GRIN2A;GRIN2A	NM_001134407;NM_000833;NM_001134408	Body;Body;Body
cg16568360	16	29987261	0.0228997	0.0177047	TAOK2;TAOK2	NM_004783;NM_016151	5'UTR;5'UTR	S_Shore
cg08514304	16	29994437	-0.0191858	0.00253189	TAOK2;TAOK2	NM_016151;NM_004783	Body;Body	N_Shelf
cg07745929	16	30002448	0.00890251	0.00232964	TAOK2	NM_004783	Body	S_Shelf
cg02492205	16	30016775	0.0136067	0.0122523	INO80E	NM_173618	3'UTR
cg06797385	16	30018105	-0.0174048	0.00028726	DOC2A	NM_003586	Body
cg01283141	16	30020506	-0.0145346	0.00517252	DOC2A	NM_003586	Body	N_Shelf
cg04502620	16	30020843	-0.0163164	0.0144367	DOC2A	NM_003586	Body	N_Shore
cg07598755	16	30023028	-0.0237189	0.00834852	DOC2A	NM_003586	TSS1500	S_Shore
cg27151362	16	30023515	-0.0473653	2.4e-07	DOC2A	NM_003586	TSS1500	S_Shore
cg03890691	16	30023615	-0.0296756	5.58e-06	DOC2A	NM_003586	TSS1500	S_Shore
cg27238547	16	30029918	-0.0117524	0.0218841				N_Shelf
cg06985993	16	30040055	0.0292039	0.0151567	FAM57B	NM_031478	Body	N_Shelf
cg03303433	16	30061433	0.0397545	5.19e-05				N_Shelf
cg07742718	16	30064149	0.013997	0.0335899	ALDOA	NM_000034	TSS1500	N_Shore
cg00713275	16	30074702	0.0211373	0.00200611	ALDOA;ALDOA;ALDOA	NM_001127617;NM_184043;NM_000034	TSS1500;TSS1500;5'UTR	N_Shore
cg00583733	16	30075102	0.0250569	0.0211265	ALDOA;ALDOA;ALDOA	NM_001127617;NM_184043;NM_000034	TSS1500;TSS1500;5'UTR	N_Shore
cg02077558	16	30092402	0.0170309	0.000616905	PPP4C	NM_002720	Body
cg05806717	16	30102542	-0.0172721	0.0129112	TBX6	NM_004608	5'UTR	N_Shore
cg05417332	16	30104025	0.0239996	0.0375056	YPEL3;TBX6;YPEL3	NM_031477;NM_004608;NM_001145524	3'UTR;TSS1500;3'UTR	S_Shore
cg26709300	16	30106682	0.0427959	4.48e-05	YPEL3;YPEL3	NM_031477;NM_001145524	1stExon;Body	N_Shore
cg27087781	16	30108404	-0.0187026	0.0155629	YPEL3;YPEL3	NM_031477;NM_001145524	TSS1500;TSS1500	S_Shore
cg03297731	16	30124293	-0.021643	0.016027	GDPD3;LOC100271831	NM_024307;NR_027081	Body;TSS1500
cg04833731	16	30124803	-0.0295719	4.89e-07	GDPD3;GDPD3;LOC100271831	NM_024307;NM_024307;NR_027081	1stExon;5'UTR;TSS1500
cg02335376	16	30124880	-0.0210239	0.0317503	GDPD3;LOC100271831	NM_024307;NR_027081	TSS200;TSS1500
cg07824081	16	30124904	-0.0393081	2.43e-07	GDPD3;LOC100271831	NM_024307;NR_027081	TSS200;TSS1500
cg08047629	16	30125047	-0.0115387	0.0491312	GDPD3;LOC100271831	NM_024307;NR_027081	TSS200;TSS1500
cg05902503	16	30133175	-0.0191287	0.000100252	MAPK3;MAPK3;MAPK3	NM_001109891;NM_002746;NM_001040056	Body;Body;Body	N_Shore
cg02286008	16	30133247	-0.0214252	4.35e-06	MAPK3;MAPK3;MAPK3	NM_001109891;NM_002746;NM_001040056	Body;Body;Body	N_Shore
cg01951491	16	67709440	-0.0149026	0.00076624	GFOD2;GFOD2	NM_030819;NR_027398	Body;Body
cg03957687	16	67864024	0.023451	0.0124102	CENPT	NM_025082	Body	N_Shelf
cg02057239	16	67868085	0.0282703	0.00154051	CENPT	NM_025082	5'UTR	S_Shore
cg13798289	16	67875619	0.0378259	7.84e-05	THAP11;CENPT	NM_020457;NM_025082	TSS1500;5'UTR	N_Shore
cg04979435	16	67875655	0.0259262	0.0237404	THAP11;CENPT	NM_020457;NM_025082	TSS1500;5'UTR	N_Shore
cg09869811	16	67897346	-0.0242925	0.000530632	NUTF2	NM_005796	5'UTR
cg07171780	16	67915238	0.0332635	0.000133743	EDC4	NM_014329	Body	N_Shelf
cg01756421	16	67918484	0.0314631	0.000427092	NRN1L	NM_198443	TSS1500	N_Shore
cg09756419	16	67918680	0.0367367	4.37e-05	NRN1L	NM_198443	TSS200	Island
cg02308079	16	67918686	0.0429342	2.04e-06	NRN1L	NM_198443	TSS200	Island
cg01068601	16	67918699	0.0317026	0.000200031	NRN1L	NM_198443	TSS200	Island
cg10574499	16	67918754	0.0323828	0.00153973	NRN1L	NM_198443	TSS200	Island
cg03294833	16	67918813	0.0445909	1.42e-05	NRN1L	NM_198443	1stExon	Island
cg00511334	16	67918840	0.0324486	0.000193171	NRN1L	NM_198443	1stExon	Island
cg02215611	16	67918965	0.0668684	4.37e-05	NRN1L	NM_198443	Body	S_Shore
cg09890374	16	67928026	0.0387674	0.017802	PSKH1	NM_006742	5'UTR	S_Shore
cg00925950	16	67946188	0.0797899	1.08e-05	PSKH1	NM_006742	Body	S_Shelf
cg03052099	16	67951373	0.0427768	0.000327357	PSKH1	NM_006742	Body
cg04205655	16	67965756	0.0104884	0.0171909	CTRL;CTRL	NM_001907;NM_001907	5'UTR;1stExon	N_Shelf
cg27038101	16	67965804	0.0344682	8.73e-05	CTRL	NM_001907	TSS200	N_Shelf
cg01281038	16	67966256	0.011708	0.0485683	CTRL	NM_001907	TSS1500	N_Shelf
cg07117311	16	67966314	0.0247186	0.00102545	CTRL	NM_001907	TSS1500	N_Shelf
cg26675485	16	67968879	0.0361849	0.000414847	PSMB10	NM_002801	Body	N_Shore
cg27506889	16	67970774	-0.0136718	0.0290719	PSMB10	NM_002801	TSS200	S_Shore
cg26924825	16	67977865	0.0643041	5e-05	SLC12A4;SLC12A4;SLC12A4;LCAT;SLC12A4;SLC12A4	NM_001145962;NM_005072;NM_001145963;NM_000229;NM_001145961;NM_001145964	3'UTR;3'UTR;3'UTR;1stExon;3'UTR;3'UTR
cg06134860	16	67977992	0.0486429	2.91e-05	SLC12A4;SLC12A4;SLC12A4;LCAT;SLC12A4;SLC12A4	NM_001145962;NM_005072;NM_001145963;NM_000229;NM_001145961;NM_001145964	3'UTR;3'UTR;3'UTR;1stExon;3'UTR;3'UTR
cg09581611	16	67978158	0.039095	0.000301678	SLC12A4;SLC12A4;SLC12A4;LCAT;SLC12A4;SLC12A4	NM_001145962;NM_005072;NM_001145963;NM_000229;NM_001145961;NM_001145964	3'UTR;3'UTR;3'UTR;TSS200;3'UTR;3'UTR
cg01817009	16	67978182	0.0550149	2.64e-06	SLC12A4;SLC12A4;SLC12A4;LCAT;SLC12A4;SLC12A4	NM_001145962;NM_005072;NM_001145963;NM_000229;NM_001145961;NM_001145964	3'UTR;3'UTR;3'UTR;TSS200;3'UTR;3'UTR
cg07207367	16	67978216	0.0417364	0.000642859	SLC12A4;SLC12A4;SLC12A4;SLC12A4;SLC12A4;LCAT	NM_001145962;NM_005072;NM_001145963;NM_001145961;NM_001145964;NM_000229	3'UTR;3'UTR;3'UTR;3'UTR;3'UTR;TSS1500
cg02564259	16	67978429	0.0793734	3.8e-06	SLC12A4;SLC12A4;SLC12A4;SLC12A4;SLC12A4;LCAT	NM_001145962;NM_005072;NM_001145963;NM_001145961;NM_001145964;NM_000229	3'UTR;3'UTR;3'UTR;3'UTR;3'UTR;TSS1500
cg09495207	16	67978445	0.051619	0.00018248	SLC12A4;SLC12A4;SLC12A4;SLC12A4;SLC12A4;LCAT	NM_001145962;NM_005072;NM_001145963;NM_001145961;NM_001145964;NM_000229	3'UTR;3'UTR;3'UTR;3'UTR;3'UTR;TSS1500
cg06839111	16	67978450	0.0451635	0.00014981	SLC12A4;SLC12A4;SLC12A4;SLC12A4;SLC12A4;LCAT	NM_001145962;NM_005072;NM_001145963;NM_001145961;NM_001145964;NM_000229	3'UTR;3'UTR;3'UTR;3'UTR;3'UTR;TSS1500
cg01489608	16	67979063	0.0212528	0.00125052	SLC12A4;SLC12A4;SLC12A4;SLC12A4;SLC12A4;LCAT	NM_001145963;NM_001145961;NM_001145962;NM_005072;NM_001145964;NM_000229	Body;Body;Body;Body;Body;TSS1500
cg07599484	16	67979106	0.0322663	0.000201568	SLC12A4;SLC12A4;SLC12A4;SLC12A4;SLC12A4;LCAT	NM_001145963;NM_001145961;NM_001145962;NM_005072;NM_001145964;NM_000229	Body;Body;Body;Body;Body;TSS1500
cg08944929	16	67979129	0.0516087	9.41e-08	SLC12A4;SLC12A4;SLC12A4;SLC12A4;SLC12A4;LCAT	NM_001145963;NM_001145961;NM_001145962;NM_005072;NM_001145964;NM_000229	Body;Body;Body;Body;Body;TSS1500
cg06378129	16	67998246	-0.0175583	0.0292042	SLC12A4;SLC12A4;SLC12A4;SLC12A4;SLC12A4	NM_001145961;NM_001145962;NM_001145963;NM_005072;NM_001145964	Body;Body;TSS1500;Body;Body	N_Shelf
cg00420526	16	67999966	-0.0263501	0.000379959	SLC12A4;SLC12A4;SLC12A4;SLC12A4	NM_001145961;NM_001145962;NM_005072;NM_001145964	Body;Body;Body;Body	N_Shore
cg09086087	16	68000763	-0.0657547	1.14e-08	SLC12A4;SLC12A4;SLC12A4;SLC12A4;SLC12A4	NM_001145964;NM_001145961;NM_001145962;NM_005072;NM_001145964	1stExon;Body;Body;Body;5'UTR	N_Shore
cg26912222	16	68000829	-0.0156712	0.0130158	SLC12A4;SLC12A4;SLC12A4;SLC12A4	NM_001145961;NM_001145962;NM_001145964;NM_005072	Body;Body;TSS200;Body	N_Shore
cg08958168	16	68001415	-0.0339651	3.01e-05	SLC12A4;SLC12A4;SLC12A4;SLC12A4	NM_001145961;NM_001145962;NM_005072;NM_001145964	Body;Body;Body;TSS1500	N_Shore
cg23656386	16	68003240	-0.0349503	6.23e-05	SLC12A4;SLC12A4;SLC12A4	NM_001145961;NM_001145962;NM_005072	TSS1500;TSS1500;TSS1500	N_Shore
cg06774893	16	68011109	0.034657	4.2e-05	DPEP3;DPEP3	NM_001129758;NM_022357	Body;Body	N_Shelf
cg10512278	16	68027839	-0.0243887	0.000372266	DPEP2	NM_022355	5'UTR	S_Shore
cg10922280	16	68034227	-0.0191609	0.00688073	DPEP2	NM_022355	TSS1500
cg03079559	16	68057026	-0.00892685	0.0041166	DUS2L;DDX28	NM_017803;NM_018380	TSS200;1stExon	Island
cg08864037	16	68074806	0.0178469	0.00896819	DUS2L	NM_017803	Body
cg04202511	16	68117991	-0.0263458	0.00772212	NFATC3;NFATC3;NFATC3;NFATC3	NM_173164;NM_173163;NM_173165;NM_004555	TSS1500;TSS1500;TSS1500;TSS1500	N_Shore
cg08208505	16	68119244	0.00998193	0.0461228	NFATC3;NFATC3;NFATC3;NFATC3	NM_173164;NM_173163;NM_173165;NM_004555	TSS200;TSS200;TSS200;TSS200	Island
cg02506867	16	68121045	0.0337206	0.00516873	NFATC3;NFATC3;NFATC3;NFATC3	NM_173163;NM_173164;NM_004555;NM_173165	Body;Body;Body;Body	S_Shore
cg10120555	16	68263340	0.0406393	0.00101387	ESRP2	NM_024939	3'UTR
cg05510337	16	68268252	-0.0271677	0.000941164	ESRP2	NM_024939	Body	N_Shore
cg22190721	16	68269295	-0.04404	0.000894833	ESRP2	NM_024939	Body	Island
cg00944421	16	68269483	-0.0300101	0.00140991	ESRP2	NM_024939	Body	Island
cg20264732	16	68269763	-0.0295266	0.00457293	ESRP2	NM_024939	1stExon	Island
cg06723863	16	68270129	-0.0704846	0.0106459	ESRP2;ESRP2	NM_024939;NM_024939	1stExon;5'UTR	Island
cg04513006	16	68270252	-0.0422952	0.000167422	ESRP2	NM_024939	TSS200	Island
cg04328477	16	68270258	-0.0254506	0.0155629	ESRP2	NM_024939	TSS200	Island
cg08694699	16	68270282	-0.04776	8.68e-06	ESRP2	NM_024939	TSS200	Island
cg01177854	16	68270387	-0.023936	0.00725569	ESRP2	NM_024939	TSS1500	Island
cg00268744	16	68281186	-0.0214798	0.00131757	PLA2G15	NM_012320	Body	S_Shore
cg04023204	16	68281979	-0.0190228	0.029265	PLA2G15	NM_012320	Body	S_Shelf
cg10049535	16	68299128	0.0253959	0.044207	SLC7A6;SLC7A6	NM_001076785;NM_003983	5'UTR;5'UTR	S_Shore
cg17648080	17	2141841	0.0545137	0.00018248	SMG6;SMG6	NM_017575;NM_001170957	Body;Body
cg27407935	17	17723235	0.0503069	9.04e-05	SREBF1;SREBF1	NM_004176;NM_001005291	Body;Body	N_Shelf
cg25999891	17	17724687	0.0590219	1e-06	SREBF1;SREBF1	NM_004176;NM_001005291	Body;Body	N_Shelf
cg10415767	17	17726759	0.0450033	0.00620404	SREBF1;SREBF1	NM_004176;NM_001005291	Body;Body	N_Shore
cg11024682	17	17730094	-0.0175902	0.0192079	SREBF1;SREBF1	NM_004176;NM_001005291	Body;Body	S_Shelf
cg00341606	17	17740405	0.0133727	0.016206	SREBF1;SREBF1	NM_001005291;NM_004176	TSS200;TSS200	Island
cg14442061	17	17740468	0.0820281	0.000105055	SREBF1;SREBF1	NM_001005291;NM_004176	TSS200;TSS200	Island
cg14808739	17	17741098	-0.0121114	0.0465604	SREBF1;SREBF1	NM_001005291;NM_004176	TSS1500;TSS1500	S_Shore
cg16460860	17	17744282	0.0458175	1.08e-05				S_Shore
cg00757262	17	17747898	0.0677668	9.91e-08	TOM1L2;TOM1L2	NM_001033551;NM_001082968	3'UTR;3'UTR	S_Shelf
cg03845363	17	17753516	0.0534345	4.21e-05	TOM1L2;TOM1L2	NM_001033551;NM_001082968	Body;Body
cg20900103	17	17764262	0.0961623	5.6e-10	TOM1L2;TOM1L2	NM_001033551;NM_001082968	Body;Body
cg00849854	17	17780937	0.0365749	0.00207007	TOM1L2;TOM1L2	NM_001033551;NM_001082968	Body;Body
cg11293112	17	17809020	0.0154061	0.0491312	TOM1L2;TOM1L2	NM_001033551;NM_001082968	Body;Body
cg24834599	17	17815477	0.00900888	0.0226224	TOM1L2;TOM1L2	NM_001033551;NM_001082968	Body;Body
cg08315130	17	17816383	-0.0211692	0.000426761	TOM1L2;TOM1L2	NM_001033551;NM_001082968	Body;Body
cg04324276	17	17817462	0.0497787	5.68e-05	TOM1L2;TOM1L2	NM_001033551;NM_001082968	Body;Body
cg17514485	17	17824756	0.0685407	7.89e-07	TOM1L2;TOM1L2	NM_001033551;NM_001082968	Body;Body
cg27232494	17	17832220	0.0571628	1.2e-05	TOM1L2;TOM1L2	NM_001033551;NM_001082968	Body;Body
cg03376089	17	17839409	0.0534388	1.19e-07	TOM1L2;TOM1L2	NM_001033551;NM_001082968	Body;Body
cg19698340	17	17846718	0.0342285	0.00159698	TOM1L2;TOM1L2	NM_001033551;NM_001082968	Body;Body
cg19142141	17	17855059	-0.0227488	1.11e-06	TOM1L2;TOM1L2	NM_001033551;NM_001082968	Body;Body
cg04273763	17	17862149	-0.0106666	0.0034093	TOM1L2;TOM1L2	NM_001033551;NM_001082968	Body;Body
cg04702509	17	17874183	0.0214739	0.0235158	TOM1L2;TOM1L2	NM_001033551;NM_001082968	Body;Body	N_Shore
cg21187669	17	17929033	0.111254	4.84e-09	ATPAF2	NM_145691	Body
cg14611258	17	17946468	0.0498125	8.57e-07	C17orf39	NM_024052	Body	S_Shelf
cg00005437	17	18010740	0.0314495	0.000136348	DRG2;MYO15A	NM_001388;NM_016239	3'UTR;TSS1500
cg21275283	17	18011513	0.0401072	6.67e-05	MYO15A	NM_016239	TSS1500
cg17793286	17	18011879	0.0935258	6.32e-09	MYO15A	NM_016239	TSS200
cg15890075	17	18011923	0.0245405	0.0104848	MYO15A	NM_016239	TSS200
cg10529796	17	18012011	0.0867114	2.38e-10	MYO15A	NM_016239	TSS200
cg04901053	17	18012014	0.0261865	0.000354173	MYO15A	NM_016239	TSS200
cg22315048	17	18012134	0.0404291	1.91e-06	MYO15A;MYO15A	NM_016239;NM_016239	1stExon;5'UTR
cg17318716	18	53171931	-0.00803013	0.00556083	TCF4;TCF4	NM_001083962;NM_003199	Body;Body
cg02887458	19	19495540	-0.0277023	0.0111711	GATAD2A	NM_017660	TSS1500	N_Shore
cg12488919	19	19515518	0.026707	0.00288237	GATAD2A	NM_017660	5'UTR	N_Shore
cg04775890	19	19586046	0.0309869	0.0022849	GATAD2A	NM_017660	Body
cg04928045	19	19612738	-0.00634902	0.0498121	GATAD2A	NM_017660	Body	Island
cg24791880	19	19616215	-0.0093697	0.0287619	GATAD2A	NM_017660	Body	S_Shelf
cg14188428	19	19625761	-0.0105607	0.0329043	TSSK6;NDUFA13	NM_032037;NM_015965	1stExon;TSS1500	Island
cg17876514	19	19637361	-0.0128744	0.00242531	NDUFA13	NM_015965	Body	N_Shelf
cg11244672	19	19639970	0.0248919	0.0226684	YJEFN3	NM_198537	Body	Island
cg20098710	19	19640075	0.0363159	0.000785297	YJEFN3	NM_198537	Body	Island
cg20038346	19	19641678	-0.0190726	0.0225049	YJEFN3	NM_198537	Body	N_Shore
cg08623644	19	19643011	0.0295508	0.00725079	YJEFN3	NM_198537	Body	N_Shore
cg26732615	19	19648335	-0.044617	0.00072808	CILP2;YJEFN3	NM_153221;NM_198537	TSS1500;3'UTR	Island
cg10669058	19	19648555	-0.0441696	0.000795816	CILP2	NM_153221	TSS1500	Island
cg22306196	19	19648656	-0.016	0.023783	CILP2	NM_153221	TSS1500	Island
cg25627242	19	19652596	-0.059407	1.52e-08	CILP2	NM_153221	Body	S_Shore
cg15215375	19	19654768	-0.0254748	0.00723722	CILP2	NM_153221	Body	Island
cg03186620	19	19657416	-0.0217323	0.00100334	CILP2	NM_153221	3'UTR	S_Shore
cg21913888	19	50084626	0.0297858	0.00425347	PRRG2;NOSIP;PRRG2	NM_000951;NM_015953;NM_000951	1stExon;TSS1500;5'UTR	S_Shore
cg21961766	19	50086378	0.027841	0.00137775	PRRG2	NM_000951	5'UTR	S_Shelf
cg13323866	19	50100052	0.0107722	0.029214	PRR12	NM_020719	Body	Island
cg05639624	19	50101012	-0.0143405	0.0361615	PRR12	NM_020719	Body	Island
cg02630628	19	50116703	0.0477064	0.000368128	PRR12	NM_020719	Body	N_Shelf
cg13691108	20	37433247	0.078685	3.06e-06	PPP1R16B	NM_015568	TSS1500	N_Shore
cg26680502	20	37433765	-0.0363866	1.81e-05	PPP1R16B	NM_015568	TSS1500	N_Shore
cg15821319	20	37434158	0.0583524	3.02e-09	PPP1R16B	NM_015568	TSS200	N_Shore
cg03288217	20	37464179	0.0879312	5.22e-08	PPP1R16B	NM_015568	5'UTR	N_Shore
cg27459437	20	37464594	0.0718279	1.08e-07	PPP1R16B	NM_015568	Body	Island
cg16958860	20	37464846	0.051076	3.63e-06	PPP1R16B	NM_015568	Body	Island
cg13201768	20	37465325	0.0533054	2.27e-06	PPP1R16B	NM_015568	Body	S_Shore
cg25098585	20	37467261	0.0173298	0.0214647	PPP1R16B	NM_015568	Body	S_Shelf
cg21352393	22	41457605	0.0253608	0.0175404				N_Shelf
cg00924855	22	41458255	0.0638817	2.19e-05				N_Shore
cg03427564	22	41489051	0.0109485	0.0375272	EP300	NM_001429	1stExon	Island
cg12968540	22	41572924	-0.040575	3.46e-05	EP300	NM_001429	Body
cg25933091	22	41572960	-0.0278106	0.000974055	EP300	NM_001429	Body
cg26798772	22	41573126	0.0336224	2.58e-05	EP300	NM_001429	Body
cg14455139	22	41573155	0.0366379	0.00235701	EP300	NM_001429	Body
cg05601844	22	41573176	0.0355454	0.00125522	EP300	NM_001429	Body
cg00299943	22	41613692	0.0471094	0.00019304	L3MBTL2	NM_031488	Body
cg16264966	22	41613790	0.0772714	3.37e-07	L3MBTL2	NM_031488	Body
cg18659483	22	41630982	-0.0205539	0.0153316	CHADL	NM_138481	Body	N_Shelf
cg06255037	22	41634447	0.0425586	0.000364526	CHADL	NM_138481	Body	Island
cg22608534	22	41635548	0.0428572	6.2e-06	CHADL	NM_138481	Body	S_Shore
cg19833679	22	41636941	0.036286	0.00129842	CHADL	NM_138481	TSS200	S_Shelf
cg22970173	22	41637080	0.0528815	6.2e-06	CHADL	NM_138481	TSS200	S_Shelf
cg16195245	22	41637354	0.0742655	1.08e-07	CHADL	NM_138481	TSS1500	S_Shelf
cg07746282	22	41637467	0.124876	1.03e-09	CHADL	NM_138481	TSS1500	S_Shelf
cg10576267	22	41641887	0.0131717	0.0321446	RANGAP1	NM_002883	3'UTR
cg00305281	22	42316176	-0.0162554	0.039627				Island
cg27450867	22	42335021	0.0521465	0.000790272	CENPM;CENPM;CENPM	NM_001110215;NM_001002876;NM_024053	3'UTR;3'UTR;3'UTR
cg24414363	22	42336273	-0.03936	1.18e-05	CENPM;CENPM;CENPM	NM_001110215;NM_001002876;NM_024053	TSS200;Body;Body
cg22926842	22	42336869	-0.0372066	2.82e-07	CENPM;CENPM;CENPM	NM_001110215;NM_001002876;NM_024053	TSS1500;Body;Body
cg08840496	22	42342527	0.0129854	0.0411523	CENPM;CENPM	NM_001002876;NM_024053	Body;Body	Island
cg20299105	22	42343697	0.0152254	0.0487783	CENPM;CENPM	NM_024053;NM_001002876	TSS1500;TSS1500	S_Shore
cg02552097	22	42343915	0.0129528	0.0118244	CENPM;CENPM	NM_024053;NM_001002876	TSS1500;TSS1500	S_Shore
cg15031579	22	42347906	0.0217881	0.0186104	LOC339674	NR_024355	TSS1500
cg09471204	22	42347991	0.0684365	3.78e-07	LOC339674	NR_024355	TSS200
cg11601000	22	42348013	0.0433308	4.64e-05	LOC339674	NR_024355	TSS200
cg16887179	22	42348061	0.048475	0.00214557	LOC339674	NR_024355	TSS200
cg10559948	22	42397392	-0.046238	2.96e-05	WBP2NL	NM_152613	Body	S_Shelf
cg16047117	22	42470063	-0.00855396	0.0237282	FAM109B	NM_001002034	TSS200	Island
cg24977886	22	42470101	-0.0233716	0.00129127	FAM109B	NM_001002034	TSS200	Island
cg08650629	22	42470106	-0.0184489	0.0365465	FAM109B	NM_001002034	TSS200	Island
cg07721547	22	42475119	0.018089	0.021566	C22orf32;FAM109B	NM_033318;NM_001002034	TSS1500;3'UTR	N_Shore
cg26799416	22	42611379	0.033152	0.0495376	TCF20;TCF20;TCF20;TCF20	NM_181492;NM_005650;NM_005650;NM_181492	1stExon;1stExon;5'UTR;5'UTR
cg27122132	22	42680319	-0.0214281	0.00981206				S_Shore
cg04019164	22	42685734	0.0205148	0.00862839				N_Shore
cg05150697	22	42685958	0.0250955	0.000795791				Island
cg21131343	22	42686019	0.034887	0.000716681				Island
cg27647370	22	42686055	0.0198772	0.0198347				Island

## Sheet: AnnotatedDMPsCON-CA1vsCA3
TargetID	CHR	MAPINFO	Delta Beta	FDR	UCSC_REFGENE_NAME	UCSC_REFGENE_ACCESSION	UCSC_REFGENE_GROUP	RELATION_TO_UCSC_CPG_ISLAND
cg06736229	1	2373387	0.0819282	0.0344829				N_Shore
cg16904348	1	2377415	0.0835937	0.0344829				S_Shore
cg13556452	1	2391241	0.0855238	0.0344829				S_Shelf
cg08653904	1	8497643	0.0927356	0.0352237	RERE;RERE	NM_012102;NM_001042681	Body;Body
cg17029193	1	8510607	-0.0507323	0.0344829	RERE;RERE	NM_012102;NM_001042681	Body;Body
cg15148088	1	8518145	0.0702941	0.0433935	RERE;RERE	NM_012102;NM_001042681	Body;Body
cg25219246	1	44053380	0.0531787	0.0474251	PTPRF;PTPRF	NM_002840;NM_130440	Body;Body	N_Shelf
cg24808162	1	44067587	0.0749086	0.0344829	PTPRF;PTPRF	NM_002840;NM_130440	Body;Body	N_Shelf
cg20577019	1	150123077	-0.0489423	0.0344829	PLEKHO1	NM_016274	Body	Island
cg20785674	1	150123490	-0.105438	0.028821	PLEKHO1	NM_016274	Body	S_Shore
cg19320294	1	150229871	0.0860287	0.0344829	CA14	NM_012113	TSS1500
cg09872278	1	150231727	0.106702	0.0190902	CA14	NM_012113	Body
cg18766795	1	177251261	0.0674833	0.0352237	FAM5B	NM_021165	3'UTR
cg05956608	1	207999258	-0.0583481	0.0274237
cg23270529	1	243584668	0.105287	0.0344829	SDCCAG8	NM_006642	Body
cg21526778	1	243584861	0.173173	0.00957512	SDCCAG8	NM_006642	Body
cg17133045	1	243877447	0.0984631	0.0352237	AKT3;AKT3	NM_005465;NM_181690	Body;Body
cg07227049	2	58335008	0.121459	0.0274237	VRK2;VRK2;VRK2;VRK2;VRK2;VRK2	NM_001130483;NM_001136027;NM_006296;NM_001130482;NM_001130480;NM_001130481	Body;Body;Body;Body;Body;Body
cg15160709	2	72357937	-0.0815809	0.0201217	CYP26B1	NM_019885	3'UTR
cg11656382	2	149406282	0.0708272	0.0493276	EPC2	NM_015630	Body	S_Shelf
cg18854872	2	198292151	0.100877	0.0141886	SF3B1;SF3B1	NM_001005526;NM_012433	Body;Body
cg12600692	2	198809390	0.110401	0.0141886	PLCL1	NM_006226	Body
cg08188368	2	233680285	0.0819005	0.0439753	GIGYF2;GIGYF2;GIGYF2;GIGYF2	NM_015575;NM_001103147;NM_001103146;NM_001103148	Body;Body;Body;Body
cg21120063	2	233734910	0.0686277	0.0452929	C2orf82	NM_206895	TSS200
cg05923681	3	52580707	0.106305	0.0228405	PBRM1;PBRM1;PBRM1	NM_181042;NM_018313;NM_018165	3'UTR;3'UTR;3'UTR
cg27125504	3	52865637	0.0874573	0.0352237	ITIH4;ITIH4	NM_001166449;NM_002218	TSS1500;TSS1500
cg00475787	3	180641553	0.12247	0.00957512	FXR1;FXR1;FXR1	NM_001013438;NM_001013439;NM_005087	Body;5'UTR;Body
cg09030852	4	170629768	0.0798595	0.0464163	CLCN3;CLCN3	NM_173872;NM_001829	Body;Body
cg23337845	4	170641374	0.0942283	0.0328743	CLCN3;CLCN3	NM_173872;NM_001829	3'UTR;3'UTR
cg18259253	5	60745986	-0.0213235	0.0464163	ZSWIM6	NM_020928	Body
cg00749118	7	1938791	-0.0289357	0.0464163	MAD1L1;MAD1L1;MAD1L1	NM_003550;NM_001013837;NM_001013836	Body;Body;Body	S_Shore
cg07610468	7	1949632	0.0696128	0.0344829	MAD1L1;MAD1L1;MAD1L1	NM_003550;NM_001013837;NM_001013836	Body;Body;Body	N_Shore
cg11797898	7	1983375	0.109219	0.0344829	MAD1L1;MAD1L1;MAD1L1	NM_003550;NM_001013837;NM_001013836	Body;Body;Body
cg05342467	7	2029732	-0.0136193	0.041707	MAD1L1;MAD1L1;MAD1L1	NM_003550;NM_001013837;NM_001013836	Body;Body;Body	S_Shore
cg26462130	7	2052961	0.0986554	0.0344829	MAD1L1;MAD1L1;MAD1L1	NM_003550;NM_001013837;NM_001013836	Body;Body;Body	N_Shore
cg14108894	7	2094628	0.0351722	0.0344829	MAD1L1;MAD1L1;MAD1L1	NM_003550;NM_001013837;NM_001013836	Body;Body;Body
cg15686782	7	2143886	-0.0440932	0.0474251	MAD1L1;MAD1L1;MAD1L1	NM_003550;NM_001013837;NM_001013836	Body;Body;Body
cg17618327	7	2143942	-0.0881131	0.0141886	MAD1L1;MAD1L1;MAD1L1	NM_003550;NM_001013837;NM_001013836	Body;Body;Body
cg24655669	7	2151788	0.0616666	0.0344829	MAD1L1;MAD1L1;MAD1L1	NM_003550;NM_001013837;NM_001013836	Body;Body;Body	N_Shelf
cg10074347	7	2182153	-0.0385522	0.0352321	MAD1L1;MAD1L1;MAD1L1	NM_003550;NM_001013837;NM_001013836	Body;Body;Body	N_Shelf
cg02568153	7	2184201	0.0581978	0.0435673	MAD1L1;MAD1L1;MAD1L1	NM_003550;NM_001013837;NM_001013836	Body;Body;Body	N_Shore
cg27436603	7	24772300	-0.0586319	0.0264348	DFNA5;DFNA5;DFNA5	NM_001127454;NM_004403;NM_001127453	5'UTR;Body;Body
cg04062190	7	86413438	0.117794	0.0474251	GRM3	NM_000840	Body	N_Shelf
cg05816398	7	104623427	0.114853	0.00957512				N_Shore
cg15857470	7	104945248	0.0755738	0.0344829	SRPK2	NM_182692	Body	S_Shelf
cg02729030	7	110879415	0.0891078	0.0344829	IMMP2L	NM_032549	Body
cg11019771	7	137085181	-0.0463465	0.0307267	DGKI	NM_004717	Body
cg15475851	10	105037349	0.0846969	0.0344829	INA	NM_032727	1stExon	Island
cg09802018	11	46357562	-0.0768873	0.0344829	DGKZ	NM_201532	Body	S_Shelf
cg27137887	11	46513635	0.0906511	0.0344829	AMBRA1	NM_017749	Body
cg24886295	11	46526683	-0.0245846	0.0253446	AMBRA1	NM_017749	Body
cg01968525	11	46575582	-0.0518863	0.0344829	AMBRA1	NM_017749	5'UTR
cg16660220	11	46576948	0.069829	0.0414374	AMBRA1	NM_017749	5'UTR
cg19244380	11	46612744	0.0917108	0.0344829	AMBRA1;AMBRA1	NM_017749;NM_017749	5'UTR;1stExon	N_Shelf
cg16676292	11	46718049	0.0784497	0.0344829	ARHGAP1	NM_004308	5'UTR	N_Shelf
cg10366093	11	57414457	-0.0692535	0.0452929	YPEL4	NM_145008	Body	Island
cg22842860	11	113348189	0.0644513	0.0474251				S_Shore
cg24868960	11	113403184	0.10244	0.0454212
cg26479868	12	29916194	0.0945133	0.0344829	TMTC1	NM_175861	Body
cg19311889	12	57483793	-0.102347	0.0253446	NAB2	NM_005967	Body	S_Shore
cg09686672	12	57589253	0.0742785	0.0384643	LRP1	NM_002332	Body
cg05225089	12	57595554	-0.0557091	0.0454212	LRP1	NM_002332	Body	N_Shore
cg06269919	12	57597136	-0.068968	0.0344829	LRP1	NM_002332	Body	Island
cg02770683	12	57597238	-0.0389486	0.028711	LRP1	NM_002332	Body	Island
cg10625931	12	57632417	0.0298236	0.0406883	NDUFA4L2	NM_020142	5'UTR	Island
cg16427983	12	123453858	0.0990719	0.0213031	ABCB9	NM_203444	5'UTR	S_Shelf
cg01973483	12	123591123	-0.0317016	0.0464163	PITPNM2	NM_020845	5'UTR
cg14790739	12	123750827	-0.0523784	0.0344829	CDK2AP1	NM_004642	Body	N_Shelf
cg23470598	14	104161211	-0.0516252	0.0141886	KLC1;KLC1	NM_182923;NM_001130107	Body;Body	N_Shelf
cg15374515	14	104161248	-0.0396828	0.0454212	KLC1;KLC1	NM_182923;NM_001130107	Body;Body	N_Shelf
cg20079298	15	40572326	-0.0742749	0.0344829				Island
cg00925950	16	67946188	0.0706804	0.0452929	PSKH1	NM_006742	Body	S_Shelf
cg01489608	16	67979063	0.033077	0.0474251	SLC12A4;SLC12A4;SLC12A4;SLC12A4;SLC12A4;LCAT	NM_001145963;NM_001145961;NM_001145962;NM_005072;NM_001145964;NM_000229	Body;Body;Body;Body;Body;TSS1500
cg00757262	17	17747898	0.0693674	0.0464163	TOM1L2;TOM1L2	NM_001033551;NM_001082968	3'UTR;3'UTR	S_Shelf
cg20900103	17	17764262	0.0904223	0.0297392	TOM1L2;TOM1L2	NM_001033551;NM_001082968	Body;Body
cg19142141	17	17855059	-0.0296363	0.0344829	TOM1L2;TOM1L2	NM_001033551;NM_001082968	Body;Body
cg21187669	17	17929033	0.116352	0.0213031	ATPAF2	NM_145691	Body
cg14611258	17	17946468	0.0423162	0.0380345	C17orf39	NM_024052	Body	S_Shelf
cg17793286	17	18011879	0.0863432	0.0380345	MYO15A	NM_016239	TSS200
cg10529796	17	18012011	0.0690377	0.0344829	MYO15A	NM_016239	TSS200
cg25627242	19	19652596	-0.060684	0.0344829	CILP2	NM_153221	Body	S_Shore
cg15215375	19	19654768	-0.0462926	0.0344829	CILP2	NM_153221	Body	Island
cg15821319	20	37434158	0.0586371	0.0253446	PPP1R16B	NM_015568	TSS200	N_Shore
cg03288217	20	37464179	0.100156	0.0380345	PPP1R16B	NM_015568	5'UTR	N_Shore
cg16195245	22	41637354	0.0753024	0.0344829	CHADL	NM_138481	TSS1500	S_Shelf
cg07746282	22	41637467	0.118351	0.0213031	CHADL	NM_138481	TSS1500	S_Shelf

## Sheet: AnnotatedDMPsSZ-CA1vsCA3
TargetID	CHR	MAPINFO	Delta Beta	FDR	UCSC_REFGENE_NAME	UCSC_REFGENE_ACCESSION	UCSC_REFGENE_GROUP	RELATION_TO_UCSC_CPG_ISLAND
cg16904348	1	2377415	0.0696988	0.0288799				S_Shore
cg15548859	1	2381299	0.0864998	0.0189057
cg14032998	1	2381623	0.0682554	0.0409282
cg12610239	1	2382748	0.0369085	0.0450114
cg05045335	1	8457417	0.0470305	0.0338786	RERE;RERE;RERE	NM_001042682;NM_012102;NM_001042681	5'UTR;Body;Body
cg25001161	1	8484338	-0.0414365	0.0189057	RERE;RERE;RERE	NM_012102;NM_001042682;NM_001042681	Body;TSS1500;Body	Island
cg00120948	1	8484417	-0.0773019	0.0120547	RERE;RERE;RERE	NM_012102;NM_001042682;NM_001042681	Body;TSS1500;Body	S_Shore
cg08653904	1	8497643	0.0998812	0.0137714	RERE;RERE	NM_012102;NM_001042681	Body;Body
cg15148088	1	8518145	0.0993456	0.0136229	RERE;RERE	NM_012102;NM_001042681	Body;Body
cg11080552	1	8556722	0.0544694	0.0298283	RERE;RERE	NM_012102;NM_001042681	Body;Body
cg14286456	1	8570225	0.0682364	0.0264311	RERE;RERE	NM_012102;NM_001042681	Body;Body
cg25722041	1	8623473	0.0466925	0.0217748	RERE;RERE	NM_012102;NM_001042681	Body;Body
cg04025127	1	44030580	0.0617856	0.0259041	PTPRF;PTPRF	NM_002840;NM_130440	Body;Body	N_Shore
cg25219246	1	44053380	0.0460902	0.0477143	PTPRF;PTPRF	NM_002840;NM_130440	Body;Body	N_Shelf
cg24808162	1	44067587	0.080152	0.0120547	PTPRF;PTPRF	NM_002840;NM_130440	Body;Body	N_Shelf
cg18269457	1	98383686	-0.0291146	0.0241465	DPYD;DPYD	NM_000110;NM_001160301	Body;Body	N_Shelf
cg23258881	1	150123037	-0.110883	0.0137714	PLEKHO1	NM_016274	Body	Island
cg20785674	1	150123490	-0.0810427	0.0145573	PLEKHO1	NM_016274	Body	S_Shore
cg23369564	1	150123734	-0.043741	0.0414719	PLEKHO1	NM_016274	Body	S_Shore
cg20791007	1	150229443	0.0505962	0.0255163	CA14	NM_012113	TSS1500
cg25727477	1	207967739	0.0883949	0.0295466	CD46;CD46;CD46;CD46;CD46;CD46;CD46;CD46;CD46;CD46;CD46;CD46;CD46;CD46	NM_172357;NM_172354;NM_172361;NM_002389;NM_153826;NM_172360;NM_172359;NM_172356;NM_172358;NM_172350;NM_172353;NM_172355;NM_172352;NM_172351	3'UTR;3'UTR;3'UTR;3'UTR;3'UTR;3'UTR;3'UTR;3'UTR;3'UTR;3'UTR;3'UTR;3'UTR;3'UTR;3'UTR
cg05956608	1	207999258	-0.0651776	0.00752846
cg17877600	1	208005598	-0.058799	0.0176238
cg05593162	1	243577377	0.0550812	0.00814394	SDCCAG8	NM_006642	Body
cg23270529	1	243584668	0.132927	0.00592352	SDCCAG8	NM_006642	Body
cg21526778	1	243584861	0.230187	0.000317494	SDCCAG8	NM_006642	Body
cg22699026	1	243646402	-0.0493412	0.0326654	SDCCAG8	NM_006642	Body	Island
cg02528319	1	243651750	0.0700418	0.0188956	SDCCAG8;AKT3	NM_006642;NM_181690	Body;3'UTR	N_Shore
cg22950111	1	243651920	0.0835978	0.00785039	SDCCAG8;AKT3	NM_006642;NM_181690	Body;3'UTR	N_Shore
cg22177451	2	57986550	0.0934435	0.0189057
cg20003050	2	58029503	-0.0228344	0.0189057
cg07227049	2	58335008	0.129986	0.00814394	VRK2;VRK2;VRK2;VRK2;VRK2;VRK2	NM_001130483;NM_001136027;NM_006296;NM_001130482;NM_001130480;NM_001130481	Body;Body;Body;Body;Body;Body
cg15160709	2	72357937	-0.063721	0.0169205	CYP26B1	NM_019885	3'UTR
cg05414442	2	72358024	-0.0800057	0.00814394	CYP26B1	NM_019885	3'UTR
cg06122697	2	72363781	0.0660408	0.0189057	CYP26B1	NM_019885	Body
cg01766396	2	198436483	0.103446	0.0299638	RFTN2	NM_144629	3'UTR
cg09096031	2	198540569	0.0514193	0.0485873	RFTN2;RFTN2	NM_144629;NM_144629	1stExon;5'UTR
cg22387019	2	198541772	0.065579	0.0452955	RFTN2	NM_144629	TSS1500
cg18267436	2	198593201	0.111874	0.0338786	BOLL;BOLL	NM_033030;NM_197970	3'UTR;3'UTR
cg07495363	2	198651076	-0.0733434	0.0188956	BOLL;BOLL	NM_197970;NM_033030	TSS200;TSS1500	Island
cg17379405	2	200716738	-0.0743926	0.00752846				S_Shore
cg08188368	2	233680285	0.0781546	0.0246177	GIGYF2;GIGYF2;GIGYF2;GIGYF2	NM_015575;NM_001103147;NM_001103146;NM_001103148	Body;Body;Body;Body
cg16596103	2	233749413	-0.056816	0.0165522	NGEF;NGEF	NM_019850;NM_001114090	Body;Body
cg07757611	3	52559064	-0.0386678	0.0338786	NT5DC2;NT5DC2	NM_001134231;NM_022908	Body;Body	S_Shore
cg07507251	3	52567010	-0.0496242	0.0323331	NT5DC2;NT5DC2	NM_001134231;NM_022908	Body;Body	Island
cg02231066	3	52567130	-0.0740361	0.0400712	NT5DC2;NT5DC2	NM_001134231;NM_022908	Body;Body	Island
cg18337363	3	52569053	0.0424443	0.0120547	NT5DC2;NT5DC2;NT5DC2	NM_022908;NM_022908;NM_001134231	5'UTR;1stExon;TSS1500	N_Shore
cg05923681	3	52580707	0.138443	0.00752846	PBRM1;PBRM1;PBRM1	NM_181042;NM_018313;NM_018165	3'UTR;3'UTR;3'UTR
cg27125504	3	52865637	0.0934345	0.0199901	ITIH4;ITIH4	NM_001166449;NM_002218	TSS1500;TSS1500
cg13641778	3	52879742	0.0590984	0.0418765	TMEM110	NM_198563	Body
cg02133011	3	63803766	0.0627161	0.0188956	C3orf49	NR_026866	TSS1500
cg20829834	3	63946048	-0.0584875	0.0414719	ATXN7;ATXN7	NM_000333;NM_001128149	Body;Body
cg20519665	3	136497758	0.0554967	0.00752846
cg00475787	3	180641553	0.085451	0.026906	FXR1;FXR1;FXR1	NM_001013438;NM_001013439;NM_005087	Body;5'UTR;Body
cg15475553	3	181101204	0.0370202	0.0253462
cg23337845	4	170641374	0.092322	0.0198176	CLCN3;CLCN3	NM_173872;NM_001829	3'UTR;3'UTR
cg25386954	5	60640139	0.108592	0.0115466	ZSWIM6	NM_020928	Body
cg04840828	5	137611496	-0.0466365	0.0246079	GFRA3	NM_001496	TSS1500	S_Shore
cg12150457	5	140165687	0.0591996	0.0217748	PCDHA1;PCDHA1;PCDHA1	NM_031411;NM_018900;NM_031410	TSS200;TSS200;TSS200	N_Shore
cg04634417	5	140220803	0.0641924	0.0412869	PCDHA6;PCDHA2;PCDHA1;PCDHA8;PCDHA7;PCDHA1;PCDHA6;PCDHA5;PCDHA8;PCDHA3;PCDHA4	NM_031849;NM_018905;NM_031411;NM_018911;NM_018910;NM_018900;NM_018909;NM_018908;NM_031856;NM_018906;NM_018907	Body;Body;Body;TSS200;Body;Body;Body;Body;TSS200;Body;Body	N_Shore
cg21771726	6	28348476	0.133118	0.00386768	ZSCAN12	NR_028077	Body	N_Shelf
cg04314624	6	28458328	-0.0614733	0.0338786				S_Shore
cg18361418	6	28499676	0.0636353	0.0188956	GPX5;GPX5	NM_003996;NM_001509	Body;Body
cg23936402	6	28499703	0.0668443	0.0426962	GPX5;GPX5	NM_003996;NM_001509	Body;Body
cg04405612	6	28499825	0.0389034	0.00752846	GPX5;GPX5	NM_003996;NM_001509	Body;Body
cg14627172	6	28510339	0.0696039	0.0282694
cg27333426	6	28552582	0.0536977	0.0198176	SCAND3	NM_052923	Body	N_Shelf
cg21144120	6	28661199	0.0633074	0.0168559
cg23250574	6	28661310	0.0724119	0.0199901
cg00749118	7	1938791	-0.036815	0.0426962	MAD1L1;MAD1L1;MAD1L1	NM_003550;NM_001013837;NM_001013836	Body;Body;Body	S_Shore
cg23667108	7	1954008	-0.0240666	0.0323331	MAD1L1;MAD1L1;MAD1L1	NM_003550;NM_001013837;NM_001013836	Body;Body;Body	S_Shelf
cg26811313	7	1959989	-0.0542796	0.0431919	MAD1L1;MAD1L1;MAD1L1	NM_003550;NM_001013837;NM_001013836	Body;Body;Body
cg08712631	7	1960676	-0.0730783	0.0399759	MAD1L1;MAD1L1;MAD1L1	NM_003550;NM_001013837;NM_001013836	Body;Body;Body
cg17551891	7	1960795	-0.0674866	0.0169205	MAD1L1;MAD1L1;MAD1L1	NM_003550;NM_001013837;NM_001013836	Body;Body;Body
cg11797898	7	1983375	0.0686858	0.0360268	MAD1L1;MAD1L1;MAD1L1	NM_003550;NM_001013837;NM_001013836	Body;Body;Body
cg21180201	7	1983503	0.0507506	0.0217748	MAD1L1;MAD1L1;MAD1L1	NM_003550;NM_001013837;NM_001013836	Body;Body;Body
cg26462130	7	2052961	0.0942428	0.00752846	MAD1L1;MAD1L1;MAD1L1	NM_003550;NM_001013837;NM_001013836	Body;Body;Body	N_Shore
cg20530835	7	2056550	0.12146	0.0021977	MAD1L1;MAD1L1;MAD1L1	NM_003550;NM_001013837;NM_001013836	Body;Body;Body	N_Shelf
cg01843768	7	2078650	0.0468218	0.0426962	MAD1L1;MAD1L1;MAD1L1	NM_003550;NM_001013837;NM_001013836	Body;Body;Body
cg06555468	7	2094790	0.0443837	0.0426962	MAD1L1;MAD1L1;MAD1L1	NM_003550;NM_001013837;NM_001013836	Body;Body;Body
cg08210507	7	2109244	0.0478801	0.0414719	MAD1L1;MAD1L1;MAD1L1	NM_003550;NM_001013837;NM_001013836	Body;Body;Body	S_Shore
cg18265118	7	2139243	0.0428625	0.0414719	MAD1L1;MAD1L1;MAD1L1	NM_003550;NM_001013837;NM_001013836	Body;Body;Body
cg17618327	7	2143942	-0.097102	0.0198176	MAD1L1;MAD1L1;MAD1L1	NM_003550;NM_001013837;NM_001013836	Body;Body;Body
cg16329842	7	2148642	0.0682266	0.020482	MAD1L1;MAD1L1;MAD1L1	NM_003550;NM_001013837;NM_001013836	Body;Body;Body
cg20689661	7	2148808	0.0960366	0.0253462	MAD1L1;MAD1L1;MAD1L1	NM_003550;NM_001013837;NM_001013836	Body;Body;Body
cg16012294	7	2151681	0.051807	0.03532	MAD1L1;MAD1L1;MAD1L1	NM_003550;NM_001013837;NM_001013836	Body;Body;Body	N_Shelf
cg24655669	7	2151788	0.0673914	0.0189057	MAD1L1;MAD1L1;MAD1L1	NM_003550;NM_001013837;NM_001013836	Body;Body;Body	N_Shelf
cg10074347	7	2182153	-0.0429521	0.0188956	MAD1L1;MAD1L1;MAD1L1	NM_003550;NM_001013837;NM_001013836	Body;Body;Body	N_Shelf
cg27436603	7	24772300	-0.0536862	0.0289123	DFNA5;DFNA5;DFNA5	NM_001127454;NM_004403;NM_001127453	5'UTR;Body;Body
cg01733570	7	24797656	-0.0524663	0.0323547	DFNA5;DFNA5;DFNA5	NM_001127453;NM_001127454;NM_004403	TSS1500;TSS200;TSS200	S_Shore
cg19706795	7	24797839	-0.041735	0.0338786	DFNA5;DFNA5;DFNA5	NM_001127453;NM_004403;NM_001127454	TSS1500;TSS1500;TSS1500	S_Shore
cg20764575	7	24797884	-0.0427522	0.0426962	DFNA5;DFNA5;DFNA5	NM_001127453;NM_004403;NM_001127454	TSS1500;TSS1500;TSS1500	S_Shore
cg04062190	7	86413438	0.109965	0.019447	GRM3	NM_000840	Body	N_Shelf
cg03997145	7	104619961	0.0676878	0.0338786
cg05816398	7	104623427	0.112243	0.0100932				N_Shore
cg25076197	7	104681440	0.0451367	0.0338786	MLL5;MLL5	NM_182931;NM_018682	Body;Body
cg05400200	7	104752143	0.0262168	0.0271298	MLL5;MLL5	NM_182931;NM_018682	Body;Body
cg08746290	7	104829801	0.0557625	0.0202822	SRPK2;SRPK2	NM_182691;NM_182692	Body;Body
cg15951914	7	104863626	0.0627862	0.0169205	SRPK2;SRPK2	NM_182691;NM_182692	Body;Body
cg21261709	7	104887042	0.0926273	0.0268841	SRPK2;SRPK2	NM_182691;NM_182692	Body;Body	S_Shore
cg02747390	7	104939819	-0.0209482	0.0450114	SRPK2	NM_182692	Body	N_Shore
cg15857470	7	104945248	0.0955713	0.0168559	SRPK2	NM_182692	Body	S_Shelf
cg02729030	7	110879415	0.106927	0.00752846	IMMP2L	NM_032549	Body
cg02787120	7	111200944	0.0591192	0.0226616	IMMP2L	NM_032549	5'UTR	N_Shore
cg08579780	8	60609179	-0.0236251	0.0399759
cg13729285	9	84764156	0.0898477	0.0189057
cg07262635	10	18689378	0.0729127	0.0323331	CACNB2;CACNB2;CACNB2;CACNB2;CACNB2;CACNB2;CACNB2;CACNB2;CACNB2	NM_201571;NM_201593;NM_000724;NM_201597;NM_201572;NM_201570;NM_201590;NM_201596;NM_001167945	Body;Body;Body;Body;Body;TSS200;Body;Body;Body
cg25334928	10	18689430	0.0578673	0.0399759	CACNB2;CACNB2;CACNB2;CACNB2;CACNB2;CACNB2;CACNB2;CACNB2;CACNB2	NM_201571;NM_201593;NM_000724;NM_201597;NM_201572;NM_201570;NM_201590;NM_201596;NM_001167945	Body;Body;Body;Body;Body;TSS200;Body;Body;Body
cg04854089	11	46355137	0.0461216	0.0426962	DGKZ	NM_201532	Body	Island
cg09802018	11	46357562	-0.0737778	0.00785039	DGKZ	NM_201532	Body	S_Shelf
cg22948808	11	46360763	-0.0475195	0.0369466	DGKZ	NM_201532	Body
cg05576959	11	46366833	-0.0502563	0.0426962	DGKZ;DGKZ	NM_201533;NM_201532	TSS200;Body	N_Shore
cg02865822	11	46383141	0.0677696	0.0314475	DGKZ;DGKZ;DGKZ;DGKZ	NM_201533;NM_001105540;NM_003646;NM_201532	Body;TSS200;Body;Body
cg26473110	11	46385365	0.0887936	0.0058821	DGKZ;DGKZ;DGKZ;DGKZ	NM_201533;NM_001105540;NM_003646;NM_201532	Body;5'UTR;Body;Body	N_Shelf
cg07052627	11	46401447	-0.043826	0.016391	MDK;DGKZ;DGKZ;DGKZ;DGKZ	NM_001012334;NM_001105540;NM_201533;NM_003646;NM_201532	TSS1500;Body;Body;Body;Body	N_Shore
cg05506446	11	46409501	-0.0302439	0.0376758	CHRM4	NM_000741	TSS1500	N_Shore
cg19784401	11	46457992	0.0814038	0.0153158	AMBRA1	NM_017749	Body
cg27137887	11	46513635	0.0816555	0.00814394	AMBRA1	NM_017749	Body
cg16660220	11	46576948	0.0974158	0.016391	AMBRA1	NM_017749	5'UTR
cg19244380	11	46612744	0.0930292	0.020482	AMBRA1;AMBRA1	NM_017749;NM_017749	5'UTR;1stExon	N_Shelf
cg24047711	11	46653059	0.0485103	0.0414719	KIAA0652;KIAA0652;KIAA0652;KIAA0652;KIAA0652	NR_024589;NR_024588;NR_024587;NM_014741;NM_001142673	Body;Body;Body;5'UTR;5'UTR
cg16389345	11	46697382	0.0582749	0.0338786
cg15637527	11	46700234	0.0491327	0.0287049	ARHGAP1	NM_004308	3'UTR
cg17420619	11	46702510	0.0332318	0.00595611	ARHGAP1	NM_004308	Body
cg16676292	11	46718049	0.0752782	0.0246177	ARHGAP1	NM_004308	5'UTR	N_Shelf
cg05433460	11	46720913	0.0616232	0.00785039	ARHGAP1;ZNF408	NM_004308;NM_024741	5'UTR;TSS1500	N_Shore
cg14716172	11	46724544	0.0996268	0.00752846	ZNF408	NM_024741	Body	N_Shelf
cg27368025	11	57414401	-0.0597636	0.0376758	YPEL4	NM_145008	Body	Island
cg15363887	11	57414557	-0.0449755	0.0350207	YPEL4	NM_145008	Body	Island
cg22842860	11	113348189	0.0640132	0.0198176				S_Shore
cg24868960	11	113403184	0.112691	0.00752846
cg04387924	11	113417579	0.041424	0.0217748
cg14101442	11	130742236	0.0501802	0.0450114
cg27431037	12	2330387	-0.0623523	0.016391	CACNA1C;CACNA1C;CACNA1C;CACNA1C;CACNA1C;CACNA1C;CACNA1C;CACNA1C;CACNA1C;CACNA1C;CACNA1C;CACNA1C;CACNA1C;CACNA1C;CACNA1C;CACNA1C;CACNA1C;CACNA1C;CACNA1C;CACNA1C;CACNA1C;CACNA1C;CACNA1C	NM_001129844;NM_001129827;NM_001129839;NM_001129834;NM_001129841;NM_000719;NM_001129830;NM_001167625;NM_001129843;NM_001167624;NM_001129835;NM_001129837;NM_001167623;NM_001129840;NM_199460;NM_001129833;NM_001129832;NM_001129829;NM_001129846;NM_001129836;NM_001129838;NM_001129831;NM_001129842	Body;Body;Body;Body;Body;Body;Body;Body;Body;Body;Body;Body;Body;Body;Body;Body;Body;Body;Body;Body;Body;Body;Body
cg20495738	12	2338399	-0.0731188	0.0145573	CACNA1C;CACNA1C;CACNA1C;CACNA1C;CACNA1C;CACNA1C;CACNA1C;CACNA1C;CACNA1C;CACNA1C;CACNA1C;CACNA1C;CACNA1C;CACNA1C;CACNA1C;CACNA1C;CACNA1C;CACNA1C;CACNA1C;CACNA1C;CACNA1C;CACNA1C;CACNA1C	NM_001129844;NM_001129827;NM_001129839;NM_001129834;NM_001129841;NM_000719;NM_001129830;NM_001167625;NM_001129843;NM_001167624;NM_001129835;NM_001129837;NM_001167623;NM_001129840;NM_199460;NM_001129833;NM_001129832;NM_001129829;NM_001129846;NM_001129836;NM_001129838;NM_001129831;NM_001129842	Body;Body;Body;Body;Body;Body;Body;Body;Body;Body;Body;Body;Body;Body;Body;Body;Body;Body;Body;Body;Body;Body;Body	N_Shore
cg11046772	12	2353479	-0.0547761	0.0217748	CACNA1C;CACNA1C;CACNA1C;CACNA1C;CACNA1C;CACNA1C;CACNA1C;CACNA1C;CACNA1C;CACNA1C;CACNA1C;CACNA1C;CACNA1C;CACNA1C;CACNA1C;CACNA1C;CACNA1C;CACNA1C;CACNA1C;CACNA1C;CACNA1C;CACNA1C;CACNA1C	NM_001129844;NM_001129827;NM_001129839;NM_001129834;NM_001129841;NM_000719;NM_001129830;NM_001167625;NM_001129843;NM_001167624;NM_001129835;NM_001129837;NM_001167623;NM_001129840;NM_199460;NM_001129833;NM_001129832;NM_001129829;NM_001129846;NM_001129836;NM_001129838;NM_001129831;NM_001129842	Body;Body;Body;Body;Body;Body;Body;Body;Body;Body;Body;Body;Body;Body;Body;Body;Body;Body;Body;Body;Body;Body;Body
cg16303353	12	2393684	-0.0655858	0.0115466	CACNA1C;CACNA1C;CACNA1C;CACNA1C;CACNA1C;CACNA1C;CACNA1C;CACNA1C;CACNA1C;CACNA1C;CACNA1C;CACNA1C;CACNA1C;CACNA1C;CACNA1C;CACNA1C;CACNA1C;CACNA1C;CACNA1C;CACNA1C;CACNA1C;CACNA1C;CACNA1C	NM_001129844;NM_001129827;NM_001129839;NM_001129834;NM_001129841;NM_000719;NM_001129830;NM_001167625;NM_001129843;NM_001167624;NM_001129835;NM_001129837;NM_001167623;NM_001129840;NM_199460;NM_001129833;NM_001129832;NM_001129829;NM_001129846;NM_001129836;NM_001129838;NM_001129831;NM_001129842	Body;Body;Body;Body;Body;Body;Body;Body;Body;Body;Body;Body;Body;Body;Body;Body;Body;Body;Body;Body;Body;Body;Body
cg14637685	12	2411116	-0.0378881	0.0145573	CACNA1C;CACNA1C;CACNA1C;CACNA1C;CACNA1C;CACNA1C;CACNA1C;CACNA1C;CACNA1C;CACNA1C;CACNA1C;CACNA1C;CACNA1C;CACNA1C;CACNA1C;CACNA1C;CACNA1C;CACNA1C;CACNA1C;CACNA1C;CACNA1C;CACNA1C;CACNA1C	NM_001129844;NM_001129827;NM_001129839;NM_001129834;NM_001129841;NM_000719;NM_001129830;NM_001167625;NM_001129843;NM_001167624;NM_001129835;NM_001129837;NM_001167623;NM_001129840;NM_199460;NM_001129833;NM_001129832;NM_001129829;NM_001129846;NM_001129836;NM_001129838;NM_001129831;NM_001129842	Body;Body;Body;Body;Body;Body;Body;Body;Body;Body;Body;Body;Body;Body;Body;Body;Body;Body;Body;Body;Body;Body;Body
cg03929575	12	29909122	0.0319238	0.0253462	TMTC1	NM_175861	Body
cg11813198	12	57572413	0.057773	0.0226644	LRP1	NM_002332	Body	S_Shelf
cg16521032	12	57587714	-0.0117157	0.0188956	MIR1228;LRP1	NR_031597;NM_002332	TSS1500;Body
cg09686672	12	57589253	0.0916326	0.00752846	LRP1	NM_002332	Body
cg06269919	12	57597136	-0.0825002	0.00752846	LRP1	NM_002332	Body	Island
cg02770683	12	57597238	-0.0229505	0.0417057	LRP1	NM_002332	Body	Island
cg16612926	12	57601671	-0.0527126	0.0217748	LRP1	NM_002332	Body
cg19535267	12	57625610	-0.0304266	0.045739	SHMT2;SHMT2;SHMT2;SHMT2;SHMT2;SHMT2;SHMT2;SHMT2	NM_001166358;NM_005412;NM_001166357;NR_029417;NR_029415;NM_001166359;NM_001166356;NR_029416	Body;Body;Body;Body;Body;Body;Body;Body	S_Shore
cg16427983	12	123453858	0.112288	0.00752846	ABCB9	NM_203444	5'UTR	S_Shelf
cg09931783	12	123469669	-0.0560477	0.0200188	PITPNM2	NM_020845	3'UTR	N_Shore
cg01311567	12	123470623	-0.0221772	0.0323331	PITPNM2	NM_020845	Body	Island
cg14644204	12	123518833	-0.0491005	0.0188956	PITPNM2	NM_020845	Body
cg01816936	12	123518888	-0.0303724	0.0369466	PITPNM2	NM_020845	Body
cg05384139	12	123548027	-0.0373614	0.0255163	PITPNM2	NM_020845	5'UTR
cg05399718	12	123555535	-0.0427619	0.0254351	PITPNM2	NM_020845	5'UTR
cg05915139	12	123582277	0.0555106	0.0217748	PITPNM2	NM_020845	5'UTR
cg01973483	12	123591123	-0.0298064	0.0188956	PITPNM2	NM_020845	5'UTR
cg25801622	12	123596413	-0.0598616	0.009995	PITPNM2	NM_020845	TSS1500
cg24619895	12	123633728	0.0578329	0.0338182				N_Shore
cg15175608	12	123636717	-0.0197269	0.0253462				S_Shore
cg16138158	12	123727023	-0.0968668	0.0495327	C12orf65;C12orf65	NM_001143905;NM_152269	5'UTR;5'UTR
cg14790739	12	123750827	-0.0385667	0.0188956	CDK2AP1	NM_004642	Body	N_Shelf
cg14017077	12	123758062	-0.0807275	0.0189057	CDK2AP1	NM_004642	TSS1500	S_Shore
cg23749536	12	123775040	0.0615584	0.009995	SBNO1;SBNO1	NM_018183;NM_001167856	3'UTR;3'UTR
cg05100282	14	99713430	-0.0540837	0.0386457	BCL11B;BCL11B	NM_022898;NM_138576	Body;Body	Island
cg09975044	14	104007538	0.0502811	0.0477143
cg23470598	14	104161211	-0.0509015	0.0390152	KLC1;KLC1	NM_182923;NM_001130107	Body;Body	N_Shelf
cg15374515	14	104161248	-0.0473882	0.00979804	KLC1;KLC1	NM_182923;NM_001130107	Body;Body	N_Shelf
cg23861457	14	104173299	-0.0281525	0.0426962	XRCC3;XRCC3;XRCC3	NM_001100119;NM_005432;NM_001100118	Body;Body;Body
cg06020164	15	40577325	0.06089	0.0248517				S_Shore
cg14076977	15	40600284	-0.0336252	0.0288302	PLCB2	NM_004573	TSS200
cg11832990	15	78832690	0.0307599	0.0223449	PSMA4;PSMA4;PSMA4	NM_001102667;NM_001102668;NM_002789	TSS200;TSS200;TSS200	Island
cg06813100	15	84974881	0.0576336	0.0418765				N_Shore
cg25647583	15	91427184	-0.0555471	0.0168559	FES;FES;FES;FES	NM_002005;NM_001143783;NM_001143784;NM_001143785	TSS1500;TSS1500;TSS1500;TSS1500	N_Shore
cg05180856	15	91428056	-0.044596	0.0477143	FES;FES;FES;FES	NM_002005;NM_001143783;NM_001143785;NM_001143784	5'UTR;TSS1500;5'UTR;TSS1500	S_Shore
cg02492205	16	30016775	0.0272706	0.0167719	INO80E	NM_173618	3'UTR
cg27151362	16	30023515	-0.0553507	0.0220129	DOC2A	NM_003586	TSS1500	S_Shore
cg04833731	16	30124803	-0.0283227	0.0294388	GDPD3;GDPD3;LOC100271831	NM_024307;NM_024307;NR_027081	1stExon;5'UTR;TSS1500
cg07824081	16	30124904	-0.037908	0.0485873	GDPD3;LOC100271831	NM_024307;NR_027081	TSS200;TSS1500
cg02286008	16	30133247	-0.0214586	0.0443939	MAPK3;MAPK3;MAPK3	NM_001109891;NM_002746;NM_001040056	Body;Body;Body	N_Shore
cg26434278	16	67876203	-0.0195255	0.0421903	CENPT;THAP11	NM_025082;NM_020457	5'UTR;TSS200	Island
cg03052099	16	67951373	0.0543361	0.0188956	PSKH1	NM_006742	Body
cg01817009	16	67978182	0.0563314	0.0188956	SLC12A4;SLC12A4;SLC12A4;LCAT;SLC12A4;SLC12A4	NM_001145962;NM_005072;NM_001145963;NM_000229;NM_001145961;NM_001145964	3'UTR;3'UTR;3'UTR;TSS200;3'UTR;3'UTR
cg09086087	16	68000763	-0.0789067	0.00752846	SLC12A4;SLC12A4;SLC12A4;SLC12A4;SLC12A4	NM_001145964;NM_001145961;NM_001145962;NM_005072;NM_001145964	1stExon;Body;Body;Body;5'UTR	N_Shore
cg17648080	17	2141841	0.0666816	0.0169205	SMG6;SMG6	NM_017575;NM_001170957	Body;Body
cg00757262	17	17747898	0.0611827	0.0376758	TOM1L2;TOM1L2	NM_001033551;NM_001082968	3'UTR;3'UTR	S_Shelf
cg20900103	17	17764262	0.0982343	0.00814394	TOM1L2;TOM1L2	NM_001033551;NM_001082968	Body;Body
cg08315130	17	17816383	-0.0291754	0.0424928	TOM1L2;TOM1L2	NM_001033551;NM_001082968	Body;Body
cg17514485	17	17824756	0.074377	0.0217748	TOM1L2;TOM1L2	NM_001033551;NM_001082968	Body;Body
cg27232494	17	17832220	0.0586168	0.0433632	TOM1L2;TOM1L2	NM_001033551;NM_001082968	Body;Body
cg03376089	17	17839409	0.0506417	0.0399759	TOM1L2;TOM1L2	NM_001033551;NM_001082968	Body;Body
cg21187669	17	17929033	0.11316	0.00752846	ATPAF2	NM_145691	Body
cg14611258	17	17946468	0.0568958	0.020482	C17orf39	NM_024052	Body	S_Shelf
cg17793286	17	18011879	0.0876084	0.0116334	MYO15A	NM_016239	TSS200
cg10529796	17	18012011	0.0839442	0.00592352	MYO15A	NM_016239	TSS200
cg25627242	19	19652596	-0.0522636	0.0399759	CILP2	NM_153221	Body	S_Shore
cg13691108	20	37433247	0.0823187	0.0399759	PPP1R16B	NM_015568	TSS1500	N_Shore
cg15821319	20	37434158	0.0627653	0.0058821	PPP1R16B	NM_015568	TSS200	N_Shore
cg03288217	20	37464179	0.0831477	0.0115466	PPP1R16B	NM_015568	5'UTR	N_Shore
cg27459437	20	37464594	0.062819	0.0246079	PPP1R16B	NM_015568	Body	Island
cg16958860	20	37464846	0.0520906	0.0306115	PPP1R16B	NM_015568	Body	Island
cg13201768	20	37465325	0.0602391	0.0189057	PPP1R16B	NM_015568	Body	S_Shore
cg00299943	22	41613692	0.0580726	0.0283979	L3MBTL2	NM_031488	Body
cg16264966	22	41613790	0.0781074	0.0226644	L3MBTL2	NM_031488	Body
cg16195245	22	41637354	0.0833693	0.0275942	CHADL	NM_138481	TSS1500	S_Shelf
cg07746282	22	41637467	0.123225	0.00752846	CHADL	NM_138481	TSS1500	S_Shelf
cg24414363	22	42336273	-0.042638	0.0432164	CENPM;CENPM;CENPM	NM_001110215;NM_001002876;NM_024053	TSS200;Body;Body
cg22926842	22	42336869	-0.0338744	0.0414719	CENPM;CENPM;CENPM	NM_001110215;NM_001002876;NM_024053	TSS1500;Body;Body
cg09471204	22	42347991	0.0609248	0.0188956	LOC339674	NR_024355	TSS200
cg11601000	22	42348013	0.0504851	0.016391	LOC339674	NR_024355	TSS200
cg16887179	22	42348061	0.0642092	0.0392985	LOC339674	NR_024355	TSS200
cg10559948	22	42397392	-0.0592416	0.045739	WBP2NL	NM_152613	Body	S_Shelf

## Sheet: AnnotatedDMPsBD-CA1vsCA3
TargetID	CHR	MAPINFO	Delta Beta	FDR	UCSC_REFGENE_NAME	UCSC_REFGENE_ACCESSION	UCSC_REFGENE_GROUP	RELATION_TO_UCSC_CPG_ISLAND
cg15548859	1	2381299	0.0942694	0.00478736
cg07700843	1	2391317	0.0520669	0.0341705				S_Shelf
cg02850689	1	2391347	0.0534567	0.0201381				S_Shelf
cg12067736	1	8412849	-0.0385514	0.0458496	RERE;RERE;RERE	NM_012102;NM_001042681;NM_001042682	3'UTR;3'UTR;3'UTR
cg09868496	1	8454006	-0.0384425	0.0304693	RERE;RERE;RERE	NM_001042682;NM_012102;NM_001042681	5'UTR;Body;Body
cg19679865	1	8467904	-0.043699	0.0109481	RERE;RERE;RERE	NM_001042682;NM_012102;NM_001042681	5'UTR;Body;Body
cg00120948	1	8484417	-0.0814494	0.0111954	RERE;RERE;RERE	NM_012102;NM_001042682;NM_001042681	Body;TSS1500;Body	S_Shore
cg08653904	1	8497643	0.087576	0.0098771	RERE;RERE	NM_012102;NM_001042681	Body;Body
cg17029193	1	8510607	-0.0407141	0.00934969	RERE;RERE	NM_012102;NM_001042681	Body;Body
cg15148088	1	8518145	0.0803004	0.0298093	RERE;RERE	NM_012102;NM_001042681	Body;Body
cg15701149	1	8536454	0.0728114	0.014257	RERE;RERE	NM_012102;NM_001042681	Body;Body
cg11080552	1	8556722	0.0572587	0.027118	RERE;RERE	NM_012102;NM_001042681	Body;Body
cg24808162	1	44067587	0.0872312	0.0045412	PTPRF;PTPRF	NM_002840;NM_130440	Body;Body	N_Shelf
cg18269457	1	98383686	0.0267006	0.0272593	DPYD;DPYD	NM_000110;NM_001160301	Body;Body	N_Shelf
cg23258881	1	150123037	-0.0973638	0.0100157	PLEKHO1	NM_016274	Body	Island
cg20577019	1	150123077	-0.0498086	0.0305459	PLEKHO1	NM_016274	Body	Island
cg11199810	1	150123146	-0.071351	0.027118	PLEKHO1	NM_016274	Body	S_Shore
cg20785674	1	150123490	-0.0809609	0.00606711	PLEKHO1	NM_016274	Body	S_Shore
cg20791007	1	150229443	0.051406	0.0298093	CA14	NM_012113	TSS1500
cg19320294	1	150229871	0.0807785	0.0220928	CA14	NM_012113	TSS1500
cg00561287	1	150230177	0.0455243	0.0205131	CA14	NM_012113	TSS200
cg00102955	1	150230345	0.0310579	0.0416128	CA14;CA14	NM_012113;NM_012113	1stExon;5'UTR
cg09872278	1	150231727	0.0844147	0.026967	CA14	NM_012113	Body
cg11109027	1	207991720	-0.0169709	0.0496188	LOC148696	NR_026817	TSS200
cg05956608	1	207999258	-0.0614416	0.00690022
cg23270529	1	243584668	0.145196	0.0045412	SDCCAG8	NM_006642	Body
cg21526778	1	243584861	0.197852	0.00426271	SDCCAG8	NM_006642	Body
cg22177451	2	57986550	0.0654852	0.0477851
cg26093711	2	58273654	0.0546792	0.014257	VRK2;VRK2;VRK2;VRK2;VRK2;VRK2	NM_001130483;NM_001130481;NM_001130480;NM_001136027;NM_001130482;NM_006296	TSS200;TSS200;TSS200;TSS200;TSS200;TSS200	Island
cg07227049	2	58335008	0.105085	0.0113623	VRK2;VRK2;VRK2;VRK2;VRK2;VRK2	NM_001130483;NM_001136027;NM_006296;NM_001130482;NM_001130480;NM_001130481	Body;Body;Body;Body;Body;Body
cg15160709	2	72357937	-0.0789395	0.0045412	CYP26B1	NM_019885	3'UTR
cg05414442	2	72358024	-0.0727942	0.00752107	CYP26B1	NM_019885	3'UTR
cg06122697	2	72363781	0.0794276	0.0129291	CYP26B1	NM_019885	Body
cg18854872	2	198292151	0.10032	0.0129291	SF3B1;SF3B1	NM_001005526;NM_012433	Body;Body
cg01766396	2	198436483	0.110821	0.02526	RFTN2	NM_144629	3'UTR
cg18267436	2	198593201	0.0835508	0.0463823	BOLL;BOLL	NM_033030;NM_197970	3'UTR;3'UTR
cg12600692	2	198809390	0.121541	0.00606711	PLCL1	NM_006226	Body
cg13982505	2	233642094	0.0744125	0.0098771	GIGYF2;GIGYF2;GIGYF2;KCNJ13;GIGYF2	NM_015575;NM_001103147;NM_001103146;NM_002242;NM_001103148	Body;Body;Body;TSS1500;Body
cg08188368	2	233680285	0.0906839	0.027118	GIGYF2;GIGYF2;GIGYF2;GIGYF2	NM_015575;NM_001103147;NM_001103146;NM_001103148	Body;Body;Body;Body
cg04276057	2	233736931	0.0489396	0.0298945	C2orf82	NM_206895	Body	N_Shelf
cg17048169	2	233744073	-0.0344561	0.0177446	NGEF;NGEF	NM_001114090;NM_019850	3'UTR;3'UTR	S_Shelf
cg16596103	2	233749413	-0.0374342	0.046632	NGEF;NGEF	NM_019850;NM_001114090	Body;Body
cg12997538	3	2553085	0.0591269	0.044266	CNTN4	NM_175607	5'UTR
cg25512439	3	2553112	0.0527193	0.010809	CNTN4	NM_175607	5'UTR
cg07757611	3	52559064	-0.0329969	0.0264853	NT5DC2;NT5DC2	NM_001134231;NM_022908	Body;Body	S_Shore
cg18337363	3	52569053	0.0411863	0.036484	NT5DC2;NT5DC2;NT5DC2	NM_022908;NM_022908;NM_001134231	5'UTR;1stExon;TSS1500	N_Shore
cg13284614	3	52569169	0.0267108	0.0284589	NT5DC2;NT5DC2;LOC440957	NM_022908;NM_001134231;NM_001124767	TSS200;TSS1500;TSS1500	N_Shore
cg05923681	3	52580707	0.12213	0.00426271	PBRM1;PBRM1;PBRM1	NM_181042;NM_018313;NM_018165	3'UTR;3'UTR;3'UTR
cg22704203	3	52867330	-0.0175801	0.0473291	MUSTN1	NM_205853	3'UTR
cg13641778	3	52879742	0.0709873	0.00491381	TMEM110	NM_198563	Body
cg02133011	3	63803766	0.0932311	0.00710342	C3orf49	NR_026866	TSS1500
cg13320202	3	63899097	-0.0596894	0.0159569	ATXN7;ATXN7	NM_000333;NM_001128149	Body;Body	S_Shore
cg08992499	3	63956514	0.107052	0.0197735	ATXN7;ATXN7	NM_000333;NM_001128149	Body;Body
cg20519665	3	136497758	0.0681875	0.0202025
cg00475787	3	180641553	0.104199	0.0206782	FXR1;FXR1;FXR1	NM_001013438;NM_001013439;NM_005087	Body;5'UTR;Body
cg25386954	5	60640139	0.0905373	0.01777	ZSWIM6	NM_020928	Body
cg06503255	5	140053350	-0.0124404	0.0405847	DND1	NM_194249	TSS200	Island
cg04634417	5	140220803	0.0543447	0.0242623	PCDHA6;PCDHA2;PCDHA1;PCDHA8;PCDHA7;PCDHA1;PCDHA6;PCDHA5;PCDHA8;PCDHA3;PCDHA4	NM_031849;NM_018905;NM_031411;NM_018911;NM_018910;NM_018900;NM_018909;NM_018908;NM_031856;NM_018906;NM_018907	Body;Body;Body;TSS200;Body;Body;Body;Body;TSS200;Body;Body	N_Shore
cg18361418	6	28499676	0.0519279	0.0404864	GPX5;GPX5	NM_003996;NM_001509	Body;Body
cg23936402	6	28499703	0.0833621	0.00679483	GPX5;GPX5	NM_003996;NM_001509	Body;Body
cg04405612	6	28499825	0.0299041	0.0392319	GPX5;GPX5	NM_003996;NM_001509	Body;Body
cg21144120	6	28661199	0.0551299	0.02526
cg23250574	6	28661310	0.0629564	0.0244484
cg01530154	6	28661712	0.033948	0.0420524
cg02421172	7	1938701	-0.0454555	0.0138973	MAD1L1;MAD1L1;MAD1L1	NM_003550;NM_001013837;NM_001013836	Body;Body;Body	S_Shore
cg16393715	7	1948819	-0.0515313	0.0449365	MAD1L1;MAD1L1;MAD1L1	NM_003550;NM_001013837;NM_001013836	Body;Body;Body	N_Shore
cg17329602	7	1948947	-0.0304297	0.0285544	MAD1L1;MAD1L1;MAD1L1	NM_003550;NM_001013837;NM_001013836	Body;Body;Body	N_Shore
cg07610468	7	1949632	0.0486667	0.026967	MAD1L1;MAD1L1;MAD1L1	NM_003550;NM_001013837;NM_001013836	Body;Body;Body	N_Shore
cg26811313	7	1959989	-0.0644897	0.0285544	MAD1L1;MAD1L1;MAD1L1	NM_003550;NM_001013837;NM_001013836	Body;Body;Body
cg08712631	7	1960676	-0.070364	0.0220928	MAD1L1;MAD1L1;MAD1L1	NM_003550;NM_001013837;NM_001013836	Body;Body;Body
cg17551891	7	1960795	-0.0722576	0.0098771	MAD1L1;MAD1L1;MAD1L1	NM_003550;NM_001013837;NM_001013836	Body;Body;Body
cg11797898	7	1983375	0.0733706	0.014257	MAD1L1;MAD1L1;MAD1L1	NM_003550;NM_001013837;NM_001013836	Body;Body;Body
cg23997168	7	1984831	-0.060799	0.00491381	MAD1L1;MAD1L1;MAD1L1	NM_003550;NM_001013837;NM_001013836	Body;Body;Body
cg07147130	7	1984938	-0.0458882	0.00346976	MAD1L1;MAD1L1;MAD1L1	NM_003550;NM_001013837;NM_001013836	Body;Body;Body
cg24858207	7	1989993	-0.0174615	0.0291894	MAD1L1;MAD1L1;MAD1L1	NM_003550;NM_001013837;NM_001013836	Body;Body;Body	N_Shore
cg23729427	7	2025799	0.0218789	0.0454666	MAD1L1;MAD1L1;MAD1L1	NM_003550;NM_001013837;NM_001013836	Body;Body;Body	N_Shore
cg21155852	7	2048760	-0.0214642	0.036484	MAD1L1;MAD1L1;MAD1L1	NM_003550;NM_001013837;NM_001013836	Body;Body;Body	S_Shelf
cg26462130	7	2052961	0.0899925	0.00761527	MAD1L1;MAD1L1;MAD1L1	NM_003550;NM_001013837;NM_001013836	Body;Body;Body	N_Shore
cg20530835	7	2056550	0.0841926	0.0288794	MAD1L1;MAD1L1;MAD1L1	NM_003550;NM_001013837;NM_001013836	Body;Body;Body	N_Shelf
cg03723481	7	2071723	0.041312	0.0304693	MAD1L1;MAD1L1;MAD1L1	NM_003550;NM_001013837;NM_001013836	Body;Body;Body
cg14108894	7	2094628	0.0271859	0.0490932	MAD1L1;MAD1L1;MAD1L1	NM_003550;NM_001013837;NM_001013836	Body;Body;Body
cg27299047	7	2103248	-0.0397723	0.029583	MAD1L1;MAD1L1;MAD1L1	NM_003550;NM_001013837;NM_001013836	Body;Body;Body	N_Shelf
cg17618327	7	2143942	-0.138797	0.00184605	MAD1L1;MAD1L1;MAD1L1	NM_003550;NM_001013837;NM_001013836	Body;Body;Body
cg10074347	7	2182153	-0.037398	0.0128066	MAD1L1;MAD1L1;MAD1L1	NM_003550;NM_001013837;NM_001013836	Body;Body;Body	N_Shelf
cg25709790	7	24742552	-0.0373087	0.0457495	DFNA5;DFNA5;DFNA5	NM_001127454;NM_004403;NM_001127453	Body;Body;Body
cg04317854	7	24762562	-0.0563462	0.0191701	DFNA5;DFNA5;DFNA5	NM_001127454;NM_004403;NM_001127453	5'UTR;Body;Body
cg27436603	7	24772300	-0.0616112	0.00606711	DFNA5;DFNA5;DFNA5	NM_001127454;NM_004403;NM_001127453	5'UTR;Body;Body
cg04062190	7	86413438	0.105881	0.00426271	GRM3	NM_000840	Body	N_Shelf
cg05816398	7	104623427	0.0958828	0.00882464				N_Shore
cg11316146	7	104624178	0.0383599	0.0392737				N_Shore
cg08746290	7	104829801	0.0540424	0.0305459	SRPK2;SRPK2	NM_182691;NM_182692	Body;Body
cg15951914	7	104863626	0.051606	0.029583	SRPK2;SRPK2	NM_182691;NM_182692	Body;Body
cg21261709	7	104887042	0.0809758	0.014687	SRPK2;SRPK2	NM_182691;NM_182692	Body;Body	S_Shore
cg15044010	7	104897205	0.0482533	0.0420524	SRPK2;SRPK2	NM_182691;NM_182692	Body;Body
cg01580934	7	104909815	0.0762033	0.0141082	SRPK2;SRPK2	NM_182691;NM_182692	TSS1500;Body
cg15857470	7	104945248	0.0967765	0.00314168	SRPK2	NM_182692	Body	S_Shelf
cg02729030	7	110879415	0.0778482	0.0111954	IMMP2L	NM_032549	Body
cg13729285	9	84764156	0.0826554	0.0098771
cg07262635	10	18689378	0.0564036	0.0129291	CACNB2;CACNB2;CACNB2;CACNB2;CACNB2;CACNB2;CACNB2;CACNB2;CACNB2	NM_201571;NM_201593;NM_000724;NM_201597;NM_201572;NM_201570;NM_201590;NM_201596;NM_001167945	Body;Body;Body;Body;Body;TSS200;Body;Body;Body
cg25334928	10	18689430	0.0571272	0.0461347	CACNB2;CACNB2;CACNB2;CACNB2;CACNB2;CACNB2;CACNB2;CACNB2;CACNB2	NM_201571;NM_201593;NM_000724;NM_201597;NM_201572;NM_201570;NM_201590;NM_201596;NM_001167945	Body;Body;Body;Body;Body;TSS200;Body;Body;Body
cg24128066	10	18689503	0.0391752	0.0260583	CACNB2;CACNB2;CACNB2;CACNB2;CACNB2;CACNB2;CACNB2;CACNB2;CACNB2	NM_201571;NM_201593;NM_000724;NM_201597;NM_201572;NM_201570;NM_201590;NM_201596;NM_001167945	Body;Body;Body;Body;Body;TSS200;Body;Body;Body
cg17255062	10	104614001	0.0308011	0.0416512	C10orf32;C10orf32;C10orf32;C10orf32	NM_144591;NM_144591;NM_001136200;NM_001136200	5'UTR;1stExon;1stExon;5'UTR	Island
cg00035347	10	104953608	-0.052725	0.0308875	NT5C2;NT5C2	NM_012229;NM_001134373	TSS1500;TSS1500	S_Shore
cg09802018	11	46357562	-0.095298	0.00303572	DGKZ	NM_201532	Body	S_Shelf
cg20091215	11	46366419	-0.0151114	0.0392319	DGKZ;DGKZ	NM_201533;NM_201532	TSS1500;Body	N_Shore
cg06061966	11	46366643	-0.0392063	0.0298093	DGKZ;DGKZ	NM_201533;NM_201532	TSS1500;Body	N_Shore
cg21663341	11	46366884	-0.0354653	0.0402985	DGKZ;DGKZ	NM_201533;NM_201532	TSS200;Body	Island
cg02865822	11	46383141	0.0718788	0.0159423	DGKZ;DGKZ;DGKZ;DGKZ	NM_201533;NM_001105540;NM_003646;NM_201532	Body;TSS200;Body;Body
cg26473110	11	46385365	0.07404	0.014257	DGKZ;DGKZ;DGKZ;DGKZ	NM_201533;NM_001105540;NM_003646;NM_201532	Body;5'UTR;Body;Body	N_Shelf
cg07052627	11	46401447	-0.0340052	0.02526	MDK;DGKZ;DGKZ;DGKZ;DGKZ	NM_001012334;NM_001105540;NM_201533;NM_003646;NM_201532	TSS1500;Body;Body;Body;Body	N_Shore
cg05506446	11	46409501	-0.0344179	0.0220928	CHRM4	NM_000741	TSS1500	N_Shore
cg27137887	11	46513635	0.0919296	0.00491381	AMBRA1	NM_017749	Body
cg16660220	11	46576948	0.0834956	0.00679483	AMBRA1	NM_017749	5'UTR
cg19244380	11	46612744	0.0779493	0.0308875	AMBRA1;AMBRA1	NM_017749;NM_017749	5'UTR;1stExon	N_Shelf
cg16389345	11	46697382	0.0687456	0.0138369
cg27652459	11	46709238	0.0764201	0.00606711	ARHGAP1	NM_004308	Body
cg16676292	11	46718049	0.0694238	0.0220928	ARHGAP1	NM_004308	5'UTR	N_Shelf
cg05433460	11	46720913	0.0512618	0.0141082	ARHGAP1;ZNF408	NM_004308;NM_024741	5'UTR;TSS1500	N_Shore
cg14716172	11	46724544	0.0877276	0.00426271	ZNF408	NM_024741	Body	N_Shelf
cg27368025	11	57414401	-0.0538174	0.0461347	YPEL4	NM_145008	Body	Island
cg10366093	11	57414457	-0.0699457	0.027118	YPEL4	NM_145008	Body	Island
cg09264906	11	57424981	0.0745582	0.0422906	CLP1;CLP1	NM_001142597;NM_006831	TSS1500;TSS1500	Island
cg22842860	11	113348189	0.0444307	0.0473537				S_Shore
cg24868960	11	113403184	0.0814009	0.00491381
cg14101442	11	130742236	0.0611751	0.0474358
cg20042908	11	133852938	0.0576649	0.0142829
cg20495738	12	2338399	-0.0593979	0.00894408	CACNA1C;CACNA1C;CACNA1C;CACNA1C;CACNA1C;CACNA1C;CACNA1C;CACNA1C;CACNA1C;CACNA1C;CACNA1C;CACNA1C;CACNA1C;CACNA1C;CACNA1C;CACNA1C;CACNA1C;CACNA1C;CACNA1C;CACNA1C;CACNA1C;CACNA1C;CACNA1C	NM_001129844;NM_001129827;NM_001129839;NM_001129834;NM_001129841;NM_000719;NM_001129830;NM_001167625;NM_001129843;NM_001167624;NM_001129835;NM_001129837;NM_001167623;NM_001129840;NM_199460;NM_001129833;NM_001129832;NM_001129829;NM_001129846;NM_001129836;NM_001129838;NM_001129831;NM_001129842	Body;Body;Body;Body;Body;Body;Body;Body;Body;Body;Body;Body;Body;Body;Body;Body;Body;Body;Body;Body;Body;Body;Body	N_Shore
cg26999577	12	2340831	0.0600408	0.0420524	CACNA1C;CACNA1C;CACNA1C;CACNA1C;CACNA1C;CACNA1C;CACNA1C;CACNA1C;CACNA1C;CACNA1C;CACNA1C;CACNA1C;CACNA1C;CACNA1C;CACNA1C;CACNA1C;CACNA1C;CACNA1C;CACNA1C;CACNA1C;CACNA1C;CACNA1C;CACNA1C	NM_001129844;NM_001129827;NM_001129839;NM_001129834;NM_001129841;NM_000719;NM_001129830;NM_001167625;NM_001129843;NM_001167624;NM_001129835;NM_001129837;NM_001167623;NM_001129840;NM_199460;NM_001129833;NM_001129832;NM_001129829;NM_001129846;NM_001129836;NM_001129838;NM_001129831;NM_001129842	Body;Body;Body;Body;Body;Body;Body;Body;Body;Body;Body;Body;Body;Body;Body;Body;Body;Body;Body;Body;Body;Body;Body	S_Shore
cg16303353	12	2393684	-0.0464395	0.0392319	CACNA1C;CACNA1C;CACNA1C;CACNA1C;CACNA1C;CACNA1C;CACNA1C;CACNA1C;CACNA1C;CACNA1C;CACNA1C;CACNA1C;CACNA1C;CACNA1C;CACNA1C;CACNA1C;CACNA1C;CACNA1C;CACNA1C;CACNA1C;CACNA1C;CACNA1C;CACNA1C	NM_001129844;NM_001129827;NM_001129839;NM_001129834;NM_001129841;NM_000719;NM_001129830;NM_001167625;NM_001129843;NM_001167624;NM_001129835;NM_001129837;NM_001167623;NM_001129840;NM_199460;NM_001129833;NM_001129832;NM_001129829;NM_001129846;NM_001129836;NM_001129838;NM_001129831;NM_001129842	Body;Body;Body;Body;Body;Body;Body;Body;Body;Body;Body;Body;Body;Body;Body;Body;Body;Body;Body;Body;Body;Body;Body
cg14637685	12	2411116	-0.038464	0.0119568	CACNA1C;CACNA1C;CACNA1C;CACNA1C;CACNA1C;CACNA1C;CACNA1C;CACNA1C;CACNA1C;CACNA1C;CACNA1C;CACNA1C;CACNA1C;CACNA1C;CACNA1C;CACNA1C;CACNA1C;CACNA1C;CACNA1C;CACNA1C;CACNA1C;CACNA1C;CACNA1C	NM_001129844;NM_001129827;NM_001129839;NM_001129834;NM_001129841;NM_000719;NM_001129830;NM_001167625;NM_001129843;NM_001167624;NM_001129835;NM_001129837;NM_001167623;NM_001129840;NM_199460;NM_001129833;NM_001129832;NM_001129829;NM_001129846;NM_001129836;NM_001129838;NM_001129831;NM_001129842	Body;Body;Body;Body;Body;Body;Body;Body;Body;Body;Body;Body;Body;Body;Body;Body;Body;Body;Body;Body;Body;Body;Body
cg17574877	12	2505548	-0.0373523	0.0206782	CACNA1C;CACNA1C;CACNA1C;CACNA1C;CACNA1C;CACNA1C;CACNA1C;CACNA1C;CACNA1C;CACNA1C;CACNA1C;CACNA1C;CACNA1C;CACNA1C;CACNA1C;CACNA1C;CACNA1C;CACNA1C;CACNA1C;CACNA1C;CACNA1C;CACNA1C;CACNA1C	NM_001129844;NM_001129827;NM_001129839;NM_001129834;NM_001129841;NM_000719;NM_001129830;NM_001167625;NM_001129843;NM_001167624;NM_001129835;NM_001129837;NM_001167623;NM_001129840;NM_199460;NM_001129833;NM_001129832;NM_001129829;NM_001129846;NM_001129836;NM_001129838;NM_001129831;NM_001129842	Body;Body;Body;Body;Body;Body;Body;Body;Body;Body;Body;Body;Body;Body;Body;Body;Body;Body;Body;Body;Body;Body;Body
cg09686672	12	57589253	0.0791521	0.00916265	LRP1	NM_002332	Body
cg05225089	12	57595554	-0.0455429	0.0129291	LRP1	NM_002332	Body	N_Shore
cg05584118	12	57595605	-0.03834	0.0206782	LRP1	NM_002332	Body	N_Shore
cg06269919	12	57597136	-0.0749196	0.0159569	LRP1	NM_002332	Body	Island
cg02770683	12	57597238	-0.0348655	0.0416128	LRP1	NM_002332	Body	Island
cg16427983	12	123453858	0.120472	0.00184605	ABCB9	NM_203444	5'UTR	S_Shelf
cg08176694	12	123519157	-0.0390215	0.0473537	PITPNM2	NM_020845	5'UTR
cg05399718	12	123555535	-0.039429	0.046632	PITPNM2	NM_020845	5'UTR
cg01973483	12	123591123	-0.0341957	0.0129689	PITPNM2	NM_020845	5'UTR
cg25801622	12	123596413	-0.0459346	0.0147945	PITPNM2	NM_020845	TSS1500
cg10672416	12	123718706	-0.082463	0.0138973	C12orf65;C12orf65	NM_001143905;NM_152269	5'UTR;5'UTR	S_Shore
cg14790739	12	123750827	-0.0562574	0.00500053	CDK2AP1	NM_004642	Body	N_Shelf
cg25630910	12	123753186	0.0357846	0.0206782	CDK2AP1	NM_004642	Body	N_Shore
cg14017077	12	123758062	-0.0594167	0.0420524	CDK2AP1	NM_004642	TSS1500	S_Shore
cg23749536	12	123775040	0.0533093	0.0392319	SBNO1;SBNO1	NM_018183;NM_001167856	3'UTR;3'UTR
cg18603577	12	123900102	-0.0452316	0.0366455	RILPL2	NM_145058	3'UTR
cg23335576	14	104009727	0.0595509	0.027235
cg20485781	14	104018735	-0.0499225	0.0261634
cg07495704	14	104091483	-0.0433885	0.0272593				N_Shelf
cg23470598	14	104161211	-0.045867	0.0098771	KLC1;KLC1	NM_182923;NM_001130107	Body;Body	N_Shelf
cg15374515	14	104161248	-0.0421413	0.0404864	KLC1;KLC1	NM_182923;NM_001130107	Body;Body	N_Shelf
cg14172849	14	104171259	-0.0335005	0.0473537	XRCC3;XRCC3;XRCC3	NM_001100119;NM_005432;NM_001100118	Body;Body;Body
cg27170268	14	104171695	-0.0528825	0.0243698	XRCC3;XRCC3;XRCC3	NM_001100119;NM_005432;NM_001100118	Body;Body;Body
cg12798040	14	104171840	-0.0356948	0.0100157	XRCC3;XRCC3;XRCC3	NM_001100119;NM_005432;NM_001100118	Body;Body;Body
cg02943420	14	104183509	-0.0289826	0.0177851	ZFYVE21	NM_024071	Body	S_Shore
cg10316525	15	40572137	-0.0399433	0.0243698				Island
cg20079298	15	40572326	-0.0777577	0.0202214				Island
cg19143959	15	40572794	-0.0452264	0.0264574				N_Shore
cg06020164	15	40577325	0.068852	0.00730454				S_Shore
cg16567056	15	40599985	-0.046017	0.0343544	PLCB2;PLCB2	NM_004573;NM_004573	1stExon;5'UTR
ch.15.59620222F	15	61832930	0.0516199	0.0418543
cg25647583	15	91427184	-0.0645587	0.00446528	FES;FES;FES;FES	NM_002005;NM_001143783;NM_001143784;NM_001143785	TSS1500;TSS1500;TSS1500;TSS1500	N_Shore
cg26405020	15	91427363	-0.0487843	0.0387377	FES;FES;FES;FES	NM_002005;NM_001143783;NM_001143784;NM_001143785	TSS1500;TSS1500;TSS1500;TSS1500	N_Shore
cg27151362	16	30023515	-0.0486838	0.0375944	DOC2A	NM_003586	TSS1500	S_Shore
cg03890691	16	30023615	-0.0374941	0.0244484	DOC2A	NM_003586	TSS1500	S_Shore
cg03303433	16	30061433	0.0462908	0.0409272				N_Shelf
cg04833731	16	30124803	-0.0328602	0.0298093	GDPD3;GDPD3;LOC100271831	NM_024307;NM_024307;NR_027081	1stExon;5'UTR;TSS1500
cg00925950	16	67946188	0.0957234	0.0129291	PSKH1	NM_006742	Body	S_Shelf
cg02564259	16	67978429	0.0799133	0.0392319	SLC12A4;SLC12A4;SLC12A4;SLC12A4;SLC12A4;LCAT	NM_001145962;NM_005072;NM_001145963;NM_001145961;NM_001145964;NM_000229	3'UTR;3'UTR;3'UTR;3'UTR;3'UTR;TSS1500
cg06839111	16	67978450	0.0600158	0.0496188	SLC12A4;SLC12A4;SLC12A4;SLC12A4;SLC12A4;LCAT	NM_001145962;NM_005072;NM_001145963;NM_001145961;NM_001145964;NM_000229	3'UTR;3'UTR;3'UTR;3'UTR;3'UTR;TSS1500
cg08944929	16	67979129	0.0591363	0.0157265	SLC12A4;SLC12A4;SLC12A4;SLC12A4;SLC12A4;LCAT	NM_001145963;NM_001145961;NM_001145962;NM_005072;NM_001145964;NM_000229	Body;Body;Body;Body;Body;TSS1500
cg09086087	16	68000763	-0.0608847	0.0206782	SLC12A4;SLC12A4;SLC12A4;SLC12A4;SLC12A4	NM_001145964;NM_001145961;NM_001145962;NM_005072;NM_001145964	1stExon;Body;Body;Body;5'UTR	N_Shore
cg22190721	16	68269295	-0.0563842	0.0496188	ESRP2	NM_024939	Body	Island
cg27407935	17	17723235	0.065702	0.00916265	SREBF1;SREBF1	NM_004176;NM_001005291	Body;Body	N_Shelf
cg25999891	17	17724687	0.0588259	0.0098771	SREBF1;SREBF1	NM_004176;NM_001005291	Body;Body	N_Shelf
cg14442061	17	17740468	0.119923	0.00426271	SREBF1;SREBF1	NM_001005291;NM_004176	TSS200;TSS200	Island
cg16460860	17	17744282	0.0584265	0.0220928				S_Shore
cg00757262	17	17747898	0.0727502	0.0159423	TOM1L2;TOM1L2	NM_001033551;NM_001082968	3'UTR;3'UTR	S_Shelf
cg20900103	17	17764262	0.0998302	0.00346976	TOM1L2;TOM1L2	NM_001033551;NM_001082968	Body;Body
cg17514485	17	17824756	0.0596544	0.0125679	TOM1L2;TOM1L2	NM_001033551;NM_001082968	Body;Body
cg27232494	17	17832220	0.0607357	0.0392319	TOM1L2;TOM1L2	NM_001033551;NM_001082968	Body;Body
cg03376089	17	17839409	0.051848	0.0248416	TOM1L2;TOM1L2	NM_001033551;NM_001082968	Body;Body
cg19142141	17	17855059	-0.0193668	0.02526	TOM1L2;TOM1L2	NM_001033551;NM_001082968	Body;Body
cg21187669	17	17929033	0.104249	0.0136467	ATPAF2	NM_145691	Body
cg17793286	17	18011879	0.106626	0.00478736	MYO15A	NM_016239	TSS200
cg10529796	17	18012011	0.107152	0.00319434	MYO15A	NM_016239	TSS200
cg22315048	17	18012134	0.0506089	0.027118	MYO15A;MYO15A	NM_016239;NM_016239	1stExon;5'UTR
cg25627242	19	19652596	-0.0652733	0.00500053	CILP2	NM_153221	Body	S_Shore
cg15821319	20	37434158	0.0536548	0.0165885	PPP1R16B	NM_015568	TSS200	N_Shore
cg03288217	20	37464179	0.0804896	0.0142829	PPP1R16B	NM_015568	5'UTR	N_Shore
cg27459437	20	37464594	0.0838245	0.0128066	PPP1R16B	NM_015568	Body	Island
cg00924855	22	41458255	0.0805796	0.00922458				N_Shore
cg25933091	22	41572960	-0.0382208	0.0310826	EP300	NM_001429	Body
cg26798772	22	41573126	0.0459134	0.0418543	EP300	NM_001429	Body
cg16264966	22	41613790	0.0908157	0.00776373	L3MBTL2	NM_031488	Body
cg22970173	22	41637080	0.0582762	0.0298945	CHADL	NM_138481	TSS200	S_Shelf
cg16195245	22	41637354	0.0641247	0.0109982	CHADL	NM_138481	TSS1500	S_Shelf
cg07746282	22	41637467	0.133052	0.00426271	CHADL	NM_138481	TSS1500	S_Shelf
cg27450867	22	42335021	0.0709127	0.0485194	CENPM;CENPM;CENPM	NM_001110215;NM_001002876;NM_024053	3'UTR;3'UTR;3'UTR
cg09471204	22	42347991	0.0657715	0.034979	LOC339674	NR_024355	TSS200
